# Supplementary material
Source: PubMed Central journal article supplement (PMC3816344)
Supplement: supp_kws473_kws473_Web_Material.pdf [file supp_kws473_kws473_Web_Material.pdf]

## WEB APPENDIX

**AGES:** The Reykjavik Study cohort comprises a random sample of the individuals born 1907-1935 and living in Reykjavik during 1967 (71% recruitment rate). Between 2002-2006 survivors of the original cohort were invited to be re-examined and 1,849 women participated in the AGES-Reykjavik Study for genotyping. This study was approved by the National Bioethics Committee, the Data Protection Authority, and the MedStar Institutional Review Board. Written informed consent was obtained from all participating subjects.

**AMISH:** The Old Order Amish cohort is drawn from a founder population in Lancaster County, PA, which can be defined by one 14-generation pedigree. The characteristics of the women in this study have been described previously (1-5). Institutional Review Board (IRB) approval was obtained from the University of Maryland, Baltimore and all participants gave informed consent. Age at menarche was self-reported, and women pregnant or 6 months postpartum were excluded. Genotyping was conducted on either the Affymetrix 500k or 6.0 genotyping chip at the UMB Genomics Core Facility (Baltimore MD 21201). A (n-1)-degree-of-freedom t test was used to assess the significance of the measured genotype. The polygenic component was modeled using the relationship matrix derived from the complete 14-generation pedigree structure, to properly control for the relatedness of all subjects in the study.

**ARIC:** The Atherosclerosis Risk in Communities (ARIC) Study is a predominantly bi-racial population-based cohort recruited from four U.S. communities: Forsyth County, North Carolina; Jackson, Mississippi; suburban areas of Minneapolis, Minnesota; and Washington County, Maryland, USA (50). The 15,792 men and women in ARIC were between 45-64 years of age at baseline and were then followed up through time (<http://www.csc.unc.edu/aric/>). Caucasian women with genotype information and a self-reported age at menarche at baseline (between 9

and 17 years of age) were included in this meta-analysis (n=4,775). This study was approved by each IRB at each field site, and by the Public Health and Nursing IRB of the University of North Carolina. Written and informed consent was provided by all participants.

Genotyping was performed using an Affymetrix 6.0 Array. Genetic variants with a call rate  $\leq 95$ , minor allele frequency  $\leq 0.01$ , or Hardy-Weinberg Equilibrium p-value  $\leq 1 \times 10^{-6}$  were excluded. Imputation and analysis were performed with MACH and ProbABEL software. Adjustments were also made for study site and population stratification using principal components.

**B58C-T1DGC and -WTCCC:** The 1958 British Birth Cohort (B58C, also known as the National Child Development Study) is a population based sample of births in England, Wales, and Scotland during one week in 1,958 and followed until 44-55 years of age. Age at menarche was derived from an examination at age 16 (6).

Genotyping was performed as part of the Type 1 Diabetes Genetics Consortium (T1DGC) and the Wellcome Trust Case Control Consortium (WTCCC) (7-9). In sum, 1,584 women passed quality controls and had information on menarche.

**COLAUS:** The Cohorte LAUSannoise (CoLaus) is a random sample of Swiss adults, aged 35-75 years old living in Lausanne, Switzerland in 2003-2006 (10). Individuals without two prior generations of European origin were excluded. Baseline questionnaire ascertained age at menarche within the nearest year. All participants gave informed consent and the study was approved the Local Ethics committees.

After applying quality controls and missing data, 2,874 women were available for genome-wide analysis for menarche before excluding any women with menarche before 9 years or after 17 years of age.

**DECODE:** The deCODE Genetics Study is study of 39,728 Icelanders as part of a nationwide cancer screening program since 1964 through the Cancer Detection Clinic, Icelandic Cancer Society. Age at menarche was self-reported was assessed through a questionnaire and items

about the age at previous birthday before menarche, and ranged between 8-20 years of age. This study was approved by the Data Protection Commission as well as the National Bioethics Committee of Iceland. Written and informed consent was obtained from all participants and personal identifiers were encrypted.

Genetic information was available for 15,864 men and women in the study (Illumina 317K/370K SNP chip) after excluding extreme menarcheal ages (<9, >17 years). As part of quality control, only individuals with a genotype yield greater than 98% were included.

**DNBC:** The Danish National Birth Cohort (DNBC) is a population-based sample of 101,042 pregnancies recruited between 1996 and 2002 (11). Participating women retrospectively reported menarche by computer-assisted telephone interviews. DNBC was approved by the Danish Scientific Ethical Committee as well as the Danish Data Protection Agency. Genome-wide data was available for 3,840 mothers and children (Illumina Human660w-Quadv1\_A chip) as part of the Gene Environment Association Studies (GENEVA) Consortium. 1,748 women had both genetic data (genotype yield  $\geq 95\%$ ) and information on menarche (9-17 years). Prior to imputation genetic variants with a call rate  $\leq 98\%$ , minor allele frequency  $\leq 0.01$ , or Hardy-Weinberg Equilibrium p-value  $\leq 0.001$  were excluded. Imputation was conducted using the MACH software package and the HapMap Phase II CEU sample as the reference panel. Age at menarche was regressed on imputed allele dosages with adjustment for birth year using MACH2QTL.

**EGCUT:** The Estonian cohort from the Estonian Genome Center, University of Tartu (EGCUT) is a population-based biobank. EGCUT methods can be found elsewhere (12). All participants signed the biobank consent form and the project was conducted in accordance to the Estonian Gene Research Act. The EGCUT samples used in this analysis are a random subset of the total cohort with genotyped information, which is over 43,000 Estonians >18 years of age. Self-reported age at menarche between 9-17 years was available for 983 females in this subset.

Genotyping was performed according to the Illumina protocol ([www.illumina.com](http://www.illumina.com)) for the Illumina HumanHap 370K CNV array. Genetic variants with a call rate  $\leq 98\%$ , minor allele frequency  $\leq 0.01$ , or Hardy-Weinberg Equilibrium p-value  $\leq 1 \times 10^{-6}$  were excluded. Imputation and analysis were performed with IMPUTEv1.0 and SNPTEST software.

**EPIC-Cohort:** The European Prospective Investigation into Cancer and Nutrition (EPIC-Norfolk) is the parent cohort of the EPID Obesity case-cohort study, and was conducted in 1993-1997 in Norfolk, United Kingdom among men and women 39-79 years of age (13). Age at menarche in years was ascertained at baseline by questionnaire. This study was approved by the Norwich Local Research Ethics Committee, and all subjects gave their written and informed consent.

The EPIC Obesity case-cohort study comprises 625 obese and 1,215 control women with menarche and genome-wide information; although only the controls are used in this analysis.

**ERF:** The Erasmus Rucphen Family (ERF) is a family-based cohort and is based on one extended family and its descents in a population isolate in the Netherlands. Detailed information about ERF can be found elsewhere (14). The Medical Ethics Committee of the Erasmus Medical Center in Rotterdam approved the study. All participants gave informed consent. Self-reported age at menarche between 9-17 years and imputed data were available for 1103 women in ERF.

Genotyping was performed using Illumina 6K, 318K, 370K, and Affymetrix 250K arrays. Genetic variants with a call rate  $\leq 98\%$ , minor allele frequency  $\leq 0.01$ , or Hardy-Weinberg Equilibrium p-value  $\leq 1 \times 10^{-6}$  were excluded. Imputation and analysis were performed with MACH and ProbABEL software.

**FHS:** The Framingham Heart Study (FHS) has been described previously and consists of several multi-generational population-based cohorts (15, 16). Women were asked to report their age at menarche at the second Offspring examination (1979-1982), at the first Third Generation examination, or at an Osteoporosis Study examination (if previous report was unavailable from

the Offspring examination, n=214). There were 3801 women with self-reported age at menarche between 9-17 years from these sources.

Genotyping was performed using Affymetrix 500K + 50K arrays. Genetic variants with a call rate  $\leq 97\%$ , minor allele frequency  $\leq 0.01$ , or Hardy-Weinberg Equilibrium p-value  $\leq 1 \times 10^{-6}$  were excluded. Imputation and analysis were performed with MACH and R-packages. Birth decade was adjusted for instead of birth year.

**HBCS:** The Helsinki Birth Cohort Study (HBCS) is a birth cohort that consists of 8760 subjects born in Helsinki between 1934 and 1944. Age at menarche was collected on the 1075 women who participated in a clinical trial between 2000 and 2002. Genotype information from Illumina 670 Wuad arrays (modified from the Illumina Infinium 610K array) was only available for 976 women. Genetic variants with a call rate  $\leq 95\%$ , minor allele frequency  $\leq 0.01$ , or Hardy-Weinberg Equilibrium p-value  $\leq 1 \times 10^{-6}$  were excluded. Imputation and analysis were performed with MACH and ProbABEL.

All subjects gave informed consent and the study was approved by the local Ethical Committee and the National Data Protection Board (when relevant).

**Health 2000 controls:** The Health 2000 Cohort-Control Subsample (GENMETS controls) is a population-based survey that was conducted by the National Institute for Health and Welfare in Finland from 2000-2001. Information on age at menarche was collected by reproductive health survey. From a sub-cohort of 6,000 individuals greater than 30 years old, a case-control study was created for genetic analysis. Controls were matched to metabolic syndrome subjects by sex, age and residence. All subjects gave informed consent and the study was approved by the local Ethical Committee and the National Data Protection Board (when relevant).

Similar to HBCS and NFBC, genotyping was performed on an Illumina 670 Quad array (modified from Illumina Infinium 610K arrays). Genetic variants with a call rate  $\leq 95\%$ , minor allele frequency  $\leq 0.01$ , or Hardy-Weinberg Equilibrium p-value  $\leq 1 \times 10^{-6}$  were excluded.

Imputation and analysis were performed with MACH and ProbABEL.

**InCHIANTI:** The InCHIANTI study is a population-based study of older populations in the Chianti region of Tuscany, Italy (17). The study consisted of individuals in the population registries of Greve in Chianti and Bagno a Ripoli 21-102 years of age, and included some related individuals. The study was approved by the Italian National Institute of Research as well as the Care of Aging Institutional Review Board.

Corrections for family structure based on the genetic data were applied all analyses.

**INDIANA:** The Indiana University premenopausal Caucasian women peak BMD study (Indiana) began in 1988 with twin pairs. Over time it has expanded to include sister pairs at least 20 years of age from Indiana, USA. Exclusion criteria included irregular menses, pregnancy or lactation 3 months prior to enrollment, history of chronic disease, current medication to affect bone density, or inability to measure bone density. Age at menarche was self-reported at study visit (n=1,497).

Genotyping was performed using Illumina HumanHap 610 Quad version 1B array. Genetic variants with a call rate  $\leq 95\%$ , minor allele frequency  $\leq 0.01$ , or Hardy-Weinberg Equilibrium p-value  $\leq 1 \times 10^{-4}$  were excluded. Imputation and analysis were performed with MACH and ProbABEL software.

**INGI-VB:** The Italian Network of Isolated Populations (INGI)-Val Borbera (VB) is a population-based cohort from population isolate from the Val Borbera Valley in the Appennine Mountains in Northwest Italy (18). Healthy participants were between 8 and 102 years old and had at least one grandfather from the valley. 910 women reported their age at menarche as being between 9 and 17 years (no exclusions). The study, including the overall plan and the informed consent form was reviewed and approved by the institutional review boards of San Raffaele Hospital in Milan and by the Regione Piemonte Ethical committee.

Genotyping was performed using Illumina 370k Quad v3 array. Genetic variants with a call rate  $\leq 95\%$ , minor allele frequency  $\leq 0.01$ , or Hardy-Weinberg Equilibrium p-value  $\leq 1 \times 10^{-4}$  were excluded. Imputation and analysis were performed with MACH and ProbABEL software.

**KORA F3 and S4:** Cooperative Health Research in the Region of Augsburg (KORA) contains a series of independent population-based cross-sectional cohorts from Southern Germany (19). This study contains data from the follow-up examination of the KORA S3 study, the KORA F3 study (10-year follow up after recruitment from 1994 to 1995) and from the KORA S4 study (1999-2001). The study was approved by the local ethics committee. All participants gave informed consent. Age at menarche between 9-17 years was self-reported by 809 women in KORA F3 and 898 women in KORA S4.

Genotyping for KORA F3 was performed using the Affymetrix 500K array (Sty I and Nsp I). Genotyping for KORA S4 was performed with the Affymetrix 6.0 array. Imputation and analysis were performed with MACH and R software.

**KORCULA:** CROATIA-Korcula (KORCULA) is a family-based cohort from the isolated island of Korcula, which includes 508 female participants with age at menarche 9-17 years and available genetic data.

Genotyping was performed using Illumina HAP 370K CNV array. Genetic variants with a call rate  $\leq 95\%$ , minor allele frequency  $\leq 0.01$ , or Hardy-Weinberg Equilibrium p-value  $\leq 1 \times 10^{-4}$  were excluded. Imputation and analysis were performed with MACH and R-packages/ProbABEL software.

**NFBC:** The Northern Finland Birth Cohort 1966 (NFBC) is a population-based cohort from the two northernmost provinces of Finland: Oulu and Lapland. Mothers who delivered babies in the areas in the year of 1966 were enrolled (<http://kelo.oulu.fi/NFBC/pub/>). At the age of 31 participants self-reported their age at menarche and a sub-sample of the full cohort was invited for a clinical visit that included genotyping. 2,648 women reported their age at menarche

between 9 and 17 years and had available genotype information. The study has been described in detail previously (20-22).

Genotyping was performed using Illumina HAP 370K CNV Duo array. Genetic variants with a call rate  $\leq 95\%$ , minor allele frequency  $\leq 0.01$ , or Hardy-Weinberg Equilibrium p-value  $\leq 1 \times 10^{-6}$  were excluded. Imputation and analysis were performed with MACH and ProbABEL software.

**NHS-BrCa and -T2D:** The Nurses' Health Study cohorts have been described previously in detail (23). Participants were between 30-55 years old and reported their ages at menarche in the initial questionnaire in 1976. The study was approved by the IRB of Brigham and Women's Hospital in Boston, MA. Informed consent was obtained from all participants.

NHS-BrCa is a nested case-control study of breast cancer derived from the 32,826 women in the blood subcohort who were free of diagnosed breast cancer at blood collection and followed for incidence disease until June 1, 2004. The 2,287 NHS participants included in the present analysis were from this nested breast cancer case-control study and were self-described Caucasians with genotype data available from the National Cancer Institute's Cancer Genetic Marker of Susceptibility (CGEMS) project (24). Genotyping was performed using Illumina HumanHap 550K array. Genetic variants with a call rate  $\leq 90\%$ , or minor allele frequency  $\leq 0.01$  were excluded. Imputation and analysis were performed with MACH and ProbABEL software.

NHS-T2D is a nested case-control study of type 2 diabetes (25). The 3,098 women included in this analysis reported an age at menarche (9-17 years) and had available genetic information. The study is a component of the Gene Environment-Association Studies, and genotyping was performed using Affymetrix 6.0 array. Genetic variants with a call rate  $\leq 98\%$ , minor allele frequency  $\leq 0.01$ , or Hardy-Weinberg Equilibrium p-value  $\leq 1 \times 10^{-4}$  were excluded. Imputation and analysis were performed with MACH and ProbABEL software.

**NTR:** The Netherlands Twin Register (NTR) is part of a longitudinal study of health assessed every 2-3 years (26). Genotype information was collected on 1,940 NTR participants as part of a



case-control study on major depression disorder (27). Females retrospectively reported their age at menarche, as was available on 1,051 female participants.

**ORCADES:** The Orkney Complex Disease Study (ORCADES) is a family-based study of the isolated Scottish archipelago of Orkney. Participants come from one of ten islands in the area, and gave their informed consent. Pregnant women were excluded from the study. Age at menarche was reported between 9 to 17 years for 348 women with available genetic information. The study was approved by the Research Ethics Committee in Orkney and Aberdeen.

Genotyping was performed using Illumina HumanHap 300 Beadchip. Genetic variants with a call rate  $\leq 97\%$ , minor allele frequency  $\leq 0.01$ , or Hardy-Weinberg Equilibrium p-value  $\leq 1 \times 10^{-5}$  were excluded. Imputation and analysis were performed with MACH and R-packages/ProbABEL software.

**QIMR:** This study is composed of two separate cohorts: the Adult and Adolescent cohorts. Recruitment for the Adult cohorts occurred in 1980-1982 as part of the Canberra Study of twins aged 17-88 at the time, and in 1989 of twins born in 1964-1971 and their first degree relatives. In sum, the Adult cohorts provided 2,256 women with menarche data to the analysis. The adolescents of the Adolescent cohort were recruited as part of studies on melanoma and cognition, and menarche was obtained using a set protocol (28). The young age of assessment resulted in a larger amount of censored data for individuals younger than the mean age of menarche in their last interview. After quality control, missing data, and excluding extreme menarche values ( $< 9$ ,  $> 17$  years), 1,272 individuals were available for analysis in the Adolescent cohort.

Informed consent was obtained from the participants and their parents prior to data collection. Genotyping and imputation details have been presented elsewhere (29).

SNPs were removed if they had a call rate  $< 95\%$ , minor allele frequency  $< 0.01$ , or Hardy-

Weinberg Equilibrium  $p$ -value  $< 1 \times 10^{-5}$ . Imputation was performed using MACH and association analysis was performed using MERLIN.

**RAINE:** The Recruitment of Western Australian Pregnancy (RAINE) cohort has been described in detail (30). Between 1989 and 1991, 2900 women were enrolled into a randomized controlled trial. Their 2,868 babies have been followed as prospective population-based cohort. Month and year of first period was recorded for each girl. A one-page questionnaire was given to the parent(s) of girls at the 10-year assessment. If the girls lived outside the Perth metropolitan area, or were not physically attending the 10-year follow-up, the questionnaire was posted along with other study material for the 10-year follow-up. The puberty questionnaire, information and consent forms given to the parents asked to prospectively record details of date of menarche and subsequent two menstrual periods, and return the questionnaire to the RAINE Study management in a supplied postage paid envelope. If the puberty questionnaire had not been returned by the time of the 14-year follow-up, mothers and the female participants were telephoned with a reminder to complete the questionnaire. Information was either collected over the phone or a copy of the questionnaire was posted. Telephone follow up allowed clarification of the recall of the date of menarche, whether date of menarche was a recent event or whether the information was retrieved from a diary, calendar or recalled from the memory of a coinciding event (such as Christmas day, school day, party). In sum, 614 participants reported an age at menarche between 9 and 17 years old between 2000-2006, were of European descent, and had available genetic information.

Genotyping was performed using Illumina 660w Quad array. Genetic variants with a call rate  $\leq 95\%$ , minor allele frequency  $\leq 0.01$ , or Hardy-Weinberg Equilibrium  $p$ -value  $\leq 5.7 \times 10^{-7}$  were excluded. Imputation and analysis were performed with MACH and R software.

**RS I-III:** The Rotterdam Studies I, II, and III (RSI-III) are population-based cohorts of men and women aged 55 years old and older living in Ommoord, Netherlands (31, 32). Participants

reported their age at menarche by questionnaire. In RS I, II, and III there were 3,175, 1,119, and 1,112 women with menarche ages between 9 and 17 years and available genetic information.

Genotyping was performed using Illumina HumanHap 550K array. Genetic variants with a call rate  $\leq 98\%$ , minor allele frequency  $\leq 0.01$ , or Hardy-Weinberg Equilibrium p-value  $\leq 1 \times 10^{-6}$  were excluded. Imputation and analysis were performed with MACH and MACH2QTL software.

**SAGE:** The Study of Addiction: Genetics and Environment (SAGE) is based on three complementary population-based studies: the Collaborative Study on the Genetics of Alcoholism (COGA), the Family Study of Cocaine Dependence (FSCD), and the Collaborative Genetic Study of Nicotine Dependence (COGENE). The three substudies were reviewed and approved by institutional review boards at all data collection sites. All subjects gave informed consent. Women were asked to report their age at menarche. Data were available for 1,291 subjects for this analysis (passed quality control and reported menarche 9-17 years). Additional information can be found here: [http://www.ncbi.nlm.nih.gov/projects/gap/cgi-bin/study.cgi?study\\_id=phs000092.v1.p1](http://www.ncbi.nlm.nih.gov/projects/gap/cgi-bin/study.cgi?study_id=phs000092.v1.p1).

Genotyping was performed using Illumina Human 1Mv1\_C array. Genetic variants with a call rate  $\leq 98\%$ , minor allele frequency  $\leq 0.01$ , or Hardy-Weinberg Equilibrium p-value  $\leq 1 \times 10^{-4}$  were excluded. Imputation and analysis were performed with IMPUTE and SNPTEST software.

**SARDINIA:** The SardiNIA genome-wide association study consists of 4,305 individuals participating in the longitudinal study of aging-related traits in the Ogliastra region of Sardinia, Italy and has been described previously (33, 34). 2,158 women had information on age at menarche and genetic data. Protocol and informed consent from each participant, has been approved by both the US-IRB and Italian Ethical Committee.

Participants need to have at least two prior generations of Sardinians in their families to be randomly selected for genotyping (n=1,412 using the Affymetrix Mapping 500K Array Set;

n=2,893 using the Affymetrix Mapping 10K Array). MACH software was used for imputation and took advantage of the relatedness of individuals in the imputation of stretches of missing genetic information.

**SPLIT:** The Croatia-Split (SPLIT) is a population-based cohort from the Dalmatian City of Split, which includes 283 female participants with age at menarche 9-17 years and available genetic data.

Genotyping was performed using Illumina HAP 370K CNV array. Genetic variants with a call rate  $\leq 95\%$ , minor allele frequency  $\leq 0.01$ , or Hardy-Weinberg Equilibrium p-value  $\leq 1 \times 10^{-4}$  were excluded. Imputation and analysis were performed with MACH and R-packages/ProbABEL software.

**TWINSUK I-III:** The TwinsUK I cohort consists of groups of twins recruited from the general population through national media, with similar disease-related and lifestyle characteristics as singletons of similar ages (35, 36). TwinsUK II and III cohorts come from the adult twin British registry (also known to be representative of the general population (37)). Age at menarche was retrospectively reported by questionnaire. All studies were approved by the Guy's and St. Thomas' Hospital Ethics Committee. Written informed consent was obtained from all participants.

Genotyping was obtained for 2,276, 671, and 1,016 women with menarche information in the three studies (I-III, respectively). Of note, the TwinsUK I sample were genotyped with the Infinium 610k assay at two centers. SNPs with call rates  $\leq 90\%$ , Hardy-Weinberg p-values  $< 10^{-4}$  and minor allele frequencies  $< 1\%$  were excluded. Subjects with genotyping errors more frequent than 2% were also removed. Imputation was done using the IMPUTE software.

**VIS:** The CROATIA-Vis (VIS) is a family-based cohort from the isolated island of Vis, which includes 502 female participants with age at menarche 9-17 years and available genetic data.

Genotyping was performed using Illumina HAP 300v1 array. Genetic variants with a call rate  $\leq 95\%$ , minor allele frequency  $\leq 0.01$ , or Hardy-Weinberg Equilibrium p-value  $\leq 1 \times 10^{-4}$  were excluded. Imputation and analysis were performed with MACH and R-packages/ProbABEL software.

**WGHS:** The Women's Genome Health Study (WGHS) is a population-based cohort of female healthcare professionals  $\geq 45$  years old who participated in the Women's Health Study, a placebo-controlled randomized trial. WGHS has been described previously (38). Self-reported age at menarche was collected at baseline by questionnaire. 22028 women with available menarche and genotyped data, and of European descent were included in this analysis.

Genotyping was performed using Illumina HumanHap300 Duo "+" array. Genetic variants with a call rate  $\leq 98\%$ , minor allele frequency  $\leq 0.01$ , or Hardy-Weinberg Equilibrium p-value  $\leq 1 \times 10^{-6}$  were excluded. Imputation and analysis were performed with MACH and MACHQ2TL software.

## MULTIPLE TESTING

In Genome-Wide Association Studies (GWAS) studies, almost all SNPs are null, and the risk of committing a false positive is huge, so it is appropriate to control the Family Wise Error Rate (FWER). Bonferroni correction is the most common way to control FWER. The Bonferroni adjusted  $P$  value is simply the nominal  $P$  value multiplied by the total number of tests. It's popular because it is so easy to perform and can control the FWER for all possible data structure. However, Bonferroni correction is very conservative, and Holm (39) proposed a step-down procedure which is always more powerful than Bonferroni correction. Let  $m$  be the number of tests and  $p_{(1)}, \dots, p_{(m)}$  be the ordered  $P$  values. The Holm's adjusted  $P$  values are

$$P_{(j)}^{\text{Holm}} = \min\{p_j, (m - j + 1), 1\}, \quad j = 1, \dots, m$$

Note that when  $m$  is large, there will be little difference between Holm's procedure and Bonferroni correction.

An alternative criterion to adjust multiple testing is to control False Discovery Rate (FDR) (40), especially when there is a large portion of truly significant hypotheses, and thus FWER is too conservative.

**Web Appendix Table 1.** Frequency distribution for the hypotheses

|                  | Not Rejected | Rejected | Total     |
|------------------|--------------|----------|-----------|
| True Hypotheses  | $T$          | $V$      | $m_0$     |
| False Hypotheses | $F$          | $S$      | $m - m_0$ |
| Total            | $m - R$      | $R$      | $m$       |

Web Appendix Table 1 is a two-by-two cross-tabulation of true status of the hypotheses and the testing results. Benjamini and Hochberg defined FDR to be  $E[V/R]$ , i.e. the expected proportion of false positives among all rejected hypotheses (40). When  $R = 0$ , set  $V/R = 0$ . They showed that when all hypotheses are truly null, i.e.  $m_0 = m$ , controlling FDR is equivalent to controlling FWER. While  $m_0 < m$ , controlling FDR is more liberal than controlling FWER, which indicates a potential gain in power. They proposed a simple step-down procedure, which can control FDR when the tests are independent. The procedure is to determine

$$k = \operatorname{argmax}_{1 \leq i \leq m} \{p_i \leq \frac{i}{m} q^*\}$$

and then rejects all  $H_i$ ,  $i = 1, \dots, k$ , where  $q^*$  is the pre-specified FDR level. To mimic the  $P$  value to give a measure of significance to every single test, one can define a “FDR  $P$  value” to be

$$p_j^{FDR} = \min\{q^*; H_j \text{ is rejected at } FDR = q^*\} = \min\left\{\frac{p_j m}{j}, p_{j+1}^{FDR}\right\}$$

Where  $j = m, \dots, 1$  and  $p_{m+1}^{FDR}$  is defined to be 1.

Storey proposed a direct approach to estimate the pFDR (41), which is defined to be

$$pFDR = E\left[\frac{V}{R} \mid R > 0\right]$$

They use the term  $Q$  value, a  $P$  value counterpart to decide the significance level for each single test.

$Q\text{ value}_i = \min \{q^* : H_i \text{ is rejected at } p\text{FDR} = q^*\}$

We applied Bonferroni correction and Holm's step-down procedure to control FWER, as well as FDR and pFDR approaches to adjust multiple testing. We used expressions shown above to calculate adjusted  $P$  values for Bonferroni correction, Holm's step-down procedure and FDR ("FDR p-value"),  $Q$  values for pFDR were calculated by the R package *qvalue* (42).

## CUMULATIVE GENETIC EFFECTS

We estimated a genetic risk scores (GRSs) for overall (BMI) and central adiposity (waist circumference/waist-hip-ratio) variants separately using three approaches. In two separate studies [the Atherosclerosis Risk in Communities Study (ARIC) with  $n=4,775$  and the Women's Genome Health Study (WGHS) with  $n=22,863$ ], we defined each GRS to be the sum of the menarche risk alleles (i.e. menarche decreasing) across all of variants previously described with the given phenotype. Both genotyped and imputed data were included in the GRSs. Waist circumference variant, rs545854, was missing in both studies. We then modeled the effect of each GRS on age at menarche in a linear regression model. First, adjustments were made for birth year and center (appropriate in ARIC) only (Web Figure 4A,D). Second, additional adjustments for population stratification were made using the same measure of population stratification as used for the individual SNP effect estimates (presented in Tables 1 and Web Tables 3-5). The results of this fully analysis are summarized in Figure 3.

Lastly, in order to estimate the association between cumulative genetic risk and age at menarche in the entire sample (up to  $n=92,105$ ) we used the publically available R package Genetics ToolboX (GTX) (43, 44) and the fixed-effect SNP-effects from Tables 1 and Web Tables 3-5. Whereas in the previous two approaches, 69 and 25 variants were included in the BMI and waist circumference/waist-hip-ratio GRSs, respectively, in this approach we included only SNPs that were independent ( $r^2 < 0.2$ ). This yielded a subset of 48 and 25 SNPs for the BMI

and waist circumference/waist-hip-ratio GRSs, respectively.

## PATHWAY AND INTERACTION ANALYSES

In order to explore if loci associated both with AAM and adiposity-related phenotypes cluster in specific biological pathways we did three sets of analyses.

First, we used the Gene Group Functional Profiling (g:Profiler) web tool to look for statistical enrichment using databases of functional evidence (e.g. Gene Ontology and biological pathways) around the chromosomal regions represented by a set of marker SNPs (<http://biit.cs.ut.ee/gprofiler/index.cgi>) (45, 46). To this aim, we investigated four sets of markers based on our study findings: 1-2) published waist circumference and BMI loci significantly associated with age at menarche ( $P < 0.05/95$ , or  $P < 0.05$  if it was previously described) with and without the inclusion of suggestive signals (all additional associations  $P < 0.05$  with inverse effects on BMI and age at menarche), 3) published BMI loci not associated with age at menarche, and 4) published waist circumference, waist-hip-ratio loci not associated with age at menarche. The nearest gene to the tested SNP was entered into g:Profiler. We also entered chromosomal regions ( $\pm 150\text{kb}$  and  $\pm 300\text{kb}$ ) around each SNP, but did not get any significant results.

Second, we used the DAPPLE web tool to search for protein-protein interactions between genes within a defined region around the input SNPs (<http://www.broadinstitute.org/mpg/dapple/dapple.php>) (47). DAPPLE builds direct and indirect interaction networks from proteins encoded for by genes in the specified chromosomal regions and estimates the significance of the identified networks based on permutation. We used three lists of marker SNPs to search a window of 300kb up and downstream of each input SNP with 10,000 permutations and specifying a common interactor binding degree cutoff of 2. These lists were: 1) published waist circumference and BMI loci significantly associated with age at



menarche ( $P < 0.05/95$ , or  $P < 0.05$  if it was previously described), 2) published BMI loci not significantly associated with age at menarche, and 3) published waist circumference and waist-hip-ratio loci not associated with age at menarche. Additionally, we re-ran the analyses entering the closest candidate gene to each signal, but these did not reveal any direct interactions.

Lastly, we examined pathways previously suggested to associate with BMI by GIANT (48). The GIANT-consortium had identified these pathways by utilizing MAGENTA gene-set enrichment analysis of GWAS meta-analysis results for adult BMI. We compared the genes listed in these pathways (all residing within 300kb of genome-wide significant BMI loci) with the loci additionally implicated significantly ( $P < 0.05/95$ ) or suggestively ( $P < 0.05$ ) with age at menarche in the current study.

## **POWER ANALYSIS**

QUANTO 1.2.4 (49) was used to calculate power to detect nominal associations and those below a Bonferroni correction for 95 tests over a range of conditions (<http://hydra.usc.edu/gxe/>). We based our expected effect size on the range of effect sizes of the adiposity variants on age at menarche reported by Elks *et al.* (8.4 to 18.2 days, or 0.02 to 0.05 year change per allele (48)), a common lower bound of sample size (~86,000), and the distribution of continuous age at menarche of the Atherosclerosis Risk in Communities Study (mean=12.9 years, standard deviation=1.5 years). QUANTO 1.2.4 was then used to calculate power within a range of observable effect sizes and common (>1%) minor allele frequencies (Web Figure 6) seen among 13 nominally significant variants after quality controls in this study.

We had over 80% power to detect a true effect at most of these loci given the minor allele frequency (MAF) and a type I error rate of 5% (Web Figure 6A). However, 2 BMI-SNPs with biologically consistent effects for menarche and BMI associations had low MAF (4% for rs13107325 and 7% for rs11847697) and therefore low power. When a Bonferroni multiple

testing correction was applied for 95 tests, only the most common variants and those with strong effects ( $\geq 20\%$  and  $\geq 14$ -day change per allele) would have greater than 80% power (Web Figure 6B).

## **ADDITIONAL STUDY ACKNOWLEDGMENTS**

**AMISH:** The Amish study was supported by NIH research grants U01 HL72515, U01 HL84756 and R01 088119, the University of Maryland General Clinical Research Center, grant M01 RR 16500, the Clinical Nutrition Research Unit of Maryland (P30 DK072488), and the Baltimore Veterans Administration Medical Center Geriatrics Research. The authors also want to acknowledge Alan R. Shuldiner and Elizabeth A. Streeten for their work on this study.

**ARIC:** The Atherosclerosis Risk in Communities Study is carried out as a collaborative study supported by National Heart, Lung, and Blood Institute contracts (HHSN268201100005C, HHSN268201100006C, HHSN268201100007C, HHSN268201100008C, HHSN268201100009C, HHSN268201100010C, HHSN268201100011C, and HHSN268201100012C). The authors would like to thank the staff and participants of the ARIC study for their important contributions.

**B58C:** We acknowledge use of phenotype and genotype data from the British 1958 Birth Cohort DNA collection, funded by the Medical Research Council grant G0000934 and the Wellcome Trust (Grant Number 068545/Z/02; <http://www.b58cgene.sgul.ac.uk/>). Genotyping for the B58C-WTCCC subset was funded by the Wellcome Trust grant 076113/B/04/Z. The B58C-T1DGC genotyping utilized resources provided by the Type 1 Diabetes Genetics Consortium, a collaborative clinical study sponsored by the National Institute of Diabetes and Digestive and Kidney Diseases (NIDDK), National Institute of Allergy and Infectious Diseases (NIAID), National Human Genome Research Institute (NHGRI), National Institute of Child Health and Human Development (NICHD), and Juvenile Diabetes Research Foundation International (JDRF) and supported by U01 DK062418. B58C-T1DGC GWAS data were deposited by the Diabetes and Inflammation Laboratory, Cambridge Institute for Medical Research (CIMR), University of Cambridge, which is funded by Juvenile Diabetes Research Foundation International, the Wellcome Trust and the National Institute for Health Research Cambridge

Biomedical Research Centre; the CIMR is in receipt of a Wellcome Trust Strategic Award (079895).

**COLAUS:** The CoLaus study was supported by research grants from the Swiss National Science Foundation (grant no: 33CSCO-122661) from GlaxoSmithKline and the Faculty of Biology and Medicine of Lausanne, Switzerland. The authors also express their gratitude to the participants in the Lausanne CoLaus study and to the investigators who have contributed to the recruitment, in particular research nurses Yolande Barreau, Anne-Lise Bastian, Binasa Ramic, Martine Moranville, Martine Baumer, Marcy Sagette, Jeanne Ecoffey and Sylvie Mermoud for data collection.

**EGCUT:** EGCUT received financing by (ENGAGE, OPENGENE), targeted financing from Estonian Government SF0180142s08, Estonian Research Roadmap through Estonian Ministry of Education and Research (3.2.0304.11-0312), Center of Excellence in Genomics (EXCEGEN) and Development Fund of University of Tartu (SP1GVARENG). We acknowledge EGCUT personnel, especially Mr V. Soo. Data analyzes were carried out in part in the High Performance Computing Center of University of Tartu.

**ERF:** The study was supported by grants from The Netherlands Organisation for Scientific Research (NWO), Erasmus MC and the Centre for Medical Systems Biology (CMSB). We are grateful to all general practitioners for their contributions, to Petra Veraart for her help in genealogy, Jeannette Vergeer for the supervision of the laboratory work and Peter Snijders for his help in data collection.

**INGI-VB:** The Italian Network of Isolated Populations (INGI)-Val Borbera (VB) study was funded by the Fondazione Compagnia di San Paolo, Cariplo Foundation and Health Ministry grant “Ricerca Finalizzata 2008”. We thank the inhabitants of the Val Borbera that made this study possible, the local administrations, the Tortona and Genova archdiocese and the ASL-AI, Novi Ligure (AI) for support. We particularly thank Clara Camaschella (Vita e Salute University,

Milano) who supervised data collection and phenotype analysis, Federico Caligaris-Cappio (Oncology-Hsr) and the internal medicine MDs of the San Raffaele Hospital, Maria Rosa Biglieri, Diego Sabbi and Silvia Bione (IGM,CNR) for their contribution to clinical data collection. We thank Massimo Ginestri (Asl-AI) for help with laboratory data analysis and Fiammetta Viganò for technical support.

**KORA F3 and S4:** The KORA Augsburg studies were financed by the Helmholtz Zentrum München, German Research Center for Environmental Health, Neuherberg, Germany and supported by grants from the German Federal Ministry of Education and Research (BMBF). Part of this work was financed by the German National Genome Research Network (NGFN). Our research was supported within the Munich Center of Health Sciences (MC Health) as part of LMUinnovativ.

**KORCULA:** The CROATIA-Korcula study was funded by grants from the Medical Research Council (UK), European Commission Framework 6 project EUROSPAN (Contract No. LSHG-CT-2006-018947) and Republic of Croatia Ministry of Science, Education and Sports research grants to I.R. (108-1080315-0302). We would like to acknowledge the staff of several institutions in Croatia that supported the field work, including but not limited to The University of Split and Zagreb Medical Schools, Institute for Anthropological Research in Zagreb and Croatian Institute for Public Health.

The SNP genotyping for the CROATIA-Korcula cohort was performed in Helmholtz Zentrum München, Neuherberg, Germany.

**NHS-BrCa and NHS-T2D:**The NHS BrCa GWA scan was performed as part of the Cancer Genetic Markers of Susceptibility initiative of the NCI. We particularly acknowledge the contributions of R. Hoover, A. Hutchinson, K. Jacobs and G. Thomas. The current research is supported by CA 40356 and U01-CA98233 from the National Cancer Institute.

The NHS/HPFS type 2 diabetes (T2D) GWAS (U01HG004399) is a component of a collaborative project that includes 13 other GWAS funded as part of the Gene Environment-Association Studies (GENEVA) under the NIH Genes, Environment and Health Initiative (GEI) (U01HG004738, U01HG004422, U01HG004402, U01HG004729, U01HG004726, U01HG004735, U01HG004415, U01HG004436, U01HG004423, U01HG004728, RFAHG006033) with additional support from individual NIH Institutes (NIDCR: U01DE018993, U01DE018903; NIAAA: U10AA008401, NIDA: P01CA089392, R01DA013423; NCI: CA63464, CA54281, CA136792, Z01CP010200). Assistance with phenotype harmonization and genotype cleaning, as well as with general study coordination, was provided by the GENEVA Coordinating Center (U01HG004446). Assistance with data cleaning was provided by the National Center for Biotechnology Information. Genotyping was performed at the Broad Institute of MIT and Harvard, with funding support from the NIH GEI (U01HG04424), and Johns Hopkins University Center for Inherited Disease Research, with support from the NIH GEI (U01HG004438) and the NIH contract "High throughput genotyping for studying the genetic contributions to human disease"(HHSN268200782096C). Additional funding for the current research was provided by the National Cancer Institute (NCI, P01CA087969, P01CA055075), and the National Institute of Diabetes and Digestive and Kidney Diseases (NIDDK, R01DK058845).

We acknowledge the study participants in the NHS for their contribution in making this study possible.

**ORCADES:** ORCADES was supported by the Chief Scientist Office of the Scottish Government, the Royal Society, the Medical Research Council Human Genetics Unit and the European Union framework program 6 EUROSPAN project (contract no. LSHG-CT-2006-018947). DNA extractions were performed at the Wellcome Trust Clinical Research Facility in Edinburgh. We would like to acknowledge the invaluable contributions of Lorraine Anderson and the research nurses in Orkney, the administrative team in Edinburgh and the people of Orkney.

**QIMR:** We thank the twins and their families for their participation. We also thank Dixie Statham, Ann Eldridge, Marlene Grace, Kerrie McAloney, Lisa Bowdler, Steven Crooks, Peter Visscher, Allan McRae, Sarah Medland, Dale Nyholt, Scott Gordon, Andrew Heath and Pamela Madden. Funding was provided by the Australian National Health and Medical Research Council (241944, 339462, 389927, 389875, 389891, 389892, 389938, 442915, 442981, 496739, 552485, 552498), the Australian Research Council (A7960034, A79906588, A79801419, DP0770096, DP0212016, DP0343921), the FP-5 GenomEUtwin Project (QLG2-CT-2002-01254), and the U.S. National Institutes of Health (NIH grants AA07535, AA10248, AA13320, AA13321, AA13326, AA14041, MH66206). A portion of the genotyping on which this study was based (Illumina 370K scans on 4300 individuals) was carried out at the Center for Inherited Disease Research, Baltimore (CIDR), through an access award to our late colleague Dr. Richard Todd (Psychiatry, Washington University School of Medicine, St Louis). Statistical analyses were carried out on the Genetic Cluster Computer, which is financially supported by the Netherlands Scientific Organization (NWO 480-05-003). E.M.B is supported by NHMRC grant.

**RAINE:** The authors are grateful to the Raine Foundation, to the Raine Study participants and their families, and to the Raine Study research staff for cohort coordination and data collection. The authors gratefully acknowledge the NH&MRC for their long term contribution to funding the study over the last 20 years and also the following Institutions for providing funding for Core Management of the Raine Study: The University of Western Australia (UWA), Raine Medical Research Foundation, UWA Faculty of Medicine, Dentistry and Health Sciences, The Telethon Institute for Child Health Research, Women and Infants Research Foundation

The authors gratefully acknowledge the assistance of the Western Australian Genetic Epidemiology Resource and the Western Australian DNA Bank (both National Health and Medical Research Council of Australia National Enabling Facilities). The authors also

acknowledge the support of the National Health and Medical Research Council of Australia (Grant ID 572613 and ID 003209) and the Canadian Institutes of Health Research (Grant ID 166067). We gratefully acknowledge the assistance of the Wind Over Water Foundation, the Telethon Institute for Child Health Research, and the Raine Medical Research Foundation of the University of Western Australia.

**SAGE:** Study of Addiction: Genetics and Environment (SAGE) funding was provided through the NIH Genes, Environment and Health Initiative [GEI] (U01 HG004422). SAGE is one of the genome-wide association studies funded as part of the Gene Environment Association Studies (GENEVA) under GEI. Assistance with phenotype harmonization and genotype cleaning, as well as with general study coordination, was provided by the GENEVA Coordinating Center (U01 HG004446). Assistance with data cleaning was provided by the National Center for Biotechnology Information. Support for collection of datasets and samples were provided by the Collaborative Study on the Genetics of Alcoholism (COGA; U10 AA008401), the Collaborative Genetic Study of Nicotine Dependence (COGEND; P01 CA089392), and the Family Study of Cocaine Dependence (FSCD; R01 DA013423, R01 DA019963). Funding support for genotyping, which was performed at the Johns Hopkins University Center for Inherited Disease Research, was provided by the NIH GEI (U01HG004438), the National Institute on Alcohol Abuse and Alcoholism, the National Institute on Drug Abuse, and the NIH contract "High throughput genotyping for studying the genetic contributions to human disease" (HHSN268200782096C).

**SARDINIA:** The SardiNIA team was supported by Contracts NO1-AG-1-2109 and HHSN271201100005C from the NIA, and in part by the Intramural Research Program of the National Institute on Aging (NIA), National Institutes of Health (NIH). The SardiNIA authors are grateful to the many volunteers who generously participate in the study, to Monsignore Piseddu, Bishop of Ogliastro, to the Mayors and administrations of the four towns involved and the Head



of Public Health Unit ASL4 in Ogliastro.

**SPLIT:** The CROATIA-Split study is funded by grants from the Medical Research Council (UK), and Republic of Croatia Ministry of Science, Education and Sports research grants to I.R. (108-1080315-0302). We would like to acknowledge the staff of several institutions in Croatia that supported the field work, including but not limited to The University of Split and Zagreb Medical Schools, Institute for Anthropological Research in Zagreb and Croatian Institute for Public Health. The SNP genotyping for the CROATIA-Split cohort was performed by AROS Applied Biotechnology, Aarhus, Denmark.

**TwinsUK:** The study was funded by the Wellcome Trust; European Community's Seventh Framework Programme (FP7/2007-2013)/grant agreement HEALTH-F2-2008-ENGAGE and the European Union FP-5 GenomEUtwin Project (QLG2-CT-2002-01254) and Framework 6 Project EUroClot. The study also receives support from the National Institute for Health Research (NIHR) comprehensive Biomedical Research Centre award to Guy's & St Thomas' NHS Foundation Trust in partnership with King's College London. We thank the staff from the TwinsUK, the DNA Collections and Genotyping Facilities at the Wellcome Trust Sanger Institute for sample preparation; Quality Control of the Twins UK cohort for genotyping (in particular Amy Chaney, Radhi Ravindrarajah, Douglas Simpkin, Cliff Hinds, and Thomas Dibling); Paul Martin and Simon Potter of the DNA and Genotyping Informatics teams for data handling; Le Centre National de Génotypage, France, led by Mark Lathrop, for genotyping; Duke University, North Carolina, USA, led by David Goldstein, for genotyping; and the Finnish Institute of Molecular Medicine, Finnish Genome Center, University of Helsinki, led by Aarno Palotie.

**VIS:** The CROATIA-Vis study was funded by grants from the Medical Research Council (UK), European Commission Framework 6 project EUROSPAN (Contract No. LSHG-CT-2006-018947) and Republic of Croatia Ministry of Science, Education and Sports research grants to I.R. (108-1080315-0302). We would like to acknowledge the staff of several institutions in

Croatia that supported the field work, including but not limited to The University of Split and Zagreb Medical Schools, Institute for Anthropological Research in Zagreb and Croatian Institute for Public Health.

The SNP genotyping for the CROATIA-Vis cohort was performed in the core genotyping laboratory of the Wellcome Trust Clinical Research Facility at the Western General Hospital, Edinburgh, Scotland.

**WGHS:** The WGHS is supported by HL043851 and HL69757 from the National Heart, Lung, and Blood Institute and CA 047988 from the National Cancer Institute, with funding for genotyping provided by Amgen.

## REFERENCES

1. Mitchell BD, McArdle PF, Shen H, et al. The genetic response to short-term interventions affecting cardiovascular function: rationale and design of the Heredity and Phenotype Intervention (HAPI) Heart Study. *American heart journal* 2008;155(5):823-8.
2. Rampersaud E, Bielak LF, Parsa A, et al. The association of coronary artery calcification and carotid artery intima-media thickness with distinct, traditional coronary artery disease risk factors in asymptomatic adults. *Am J Epidemiol* 2008;168(9):1016-23.
3. Shuldiner AR, O'Connell JR, Bliden KP, et al. Association of cytochrome P450 2C19 genotype with the antiplatelet effect and clinical efficacy of clopidogrel therapy. *JAMA : the journal of the American Medical Association* 2009;302(8):849-57.
4. Sorkin J, Post W, Pollin TI, et al. Exploring the genetics of longevity in the Old Order Amish. *Mechanisms of ageing and development* 2005;126(2):347-50.
5. Streeten EA, McBride DJ, Lodge AL, et al. Reduced incidence of hip fracture in the Old Order Amish. *Journal of bone and mineral research : the official journal of the American Society for Bone and Mineral Research* 2004;19(2):308-13.
6. Stark O, Peckham CS, Moynihan C. Weight and age at menarche. *Archives of disease in childhood* 1989;64(3):383-7.
7. Genome-wide association study of 14,000 cases of seven common diseases and 3,000 shared controls. *Nature* 2007;447(7145):661-78.
8. Barrett JC, Clayton DG, Concannon P, et al. Genome-wide association study and meta-analysis find that over 40 loci affect risk of type 1 diabetes. *Nat Genet* 2009;41(6):703-7.
9. Power C, Elliott J. Cohort profile: 1958 British birth cohort (National Child Development Study). *International journal of epidemiology* 2006;35(1):34-41.

10. Firmann M, Mayor V, Vidal PM, et al. The CoLaus study: a population-based study to investigate the epidemiology and genetic determinants of cardiovascular risk factors and metabolic syndrome. *BMC cardiovascular disorders* 2008;8:6.
11. Olsen J, Melbye M, Olsen SF, et al. The Danish National Birth Cohort--its background, structure and aim. *Scandinavian journal of public health* 2001;29(4):300-7.
12. Metspalu A, Kohler F, Laschinski G, et al. [The Estonian Genome Project in the context of European genome research]. *Dtsch Med Wochenschr* 2004;129 Suppl 1:S25-8.
13. Day N, Oakes S, Luben R, et al. EPIC-Norfolk: study design and characteristics of the cohort. European Prospective Investigation of Cancer. *British journal of cancer* 1999;80 Suppl 1:95-103.
14. Aulchenko YS, Heutink P, Mackay I, et al. Linkage disequilibrium in young genetically isolated Dutch population. *Eur J Hum Genet* 2004;12(7):527-34.
15. Dawber TR, Meadors GF, Moore FE, Jr. Epidemiological approaches to heart disease: the Framingham Study. *Am J Public Health Nations Health* 1951;41(3):279-81.
16. Splansky GL, Corey D, Yang Q, et al. The Third Generation Cohort of the National Heart, Lung, and Blood Institute's Framingham Heart Study: design, recruitment, and initial examination. *Am J Epidemiol* 2007;165(11):1328-35.
17. Ferrucci L, Bandinelli S, Benvenuti E, et al. Subsystems contributing to the decline in ability to walk: bridging the gap between epidemiology and geriatric practice in the InCHIANTI study. *Journal of the American Geriatrics Society* 2000;48(12):1618-25.
18. Traglia M, Sala C, Masciullo C, et al. Heritability and demographic analyses in the large isolated population of Val Borbera suggest advantages in mapping complex traits genes. *PLoS One* 2009;4(10):e7554.

19. Wichmann HE, Gieger C, Illig T. KORA-gen--resource for population genetics, controls and a broad spectrum of disease phenotypes. *Gesundheitswesen* 2005;67 Suppl 1:S26-30.
20. Laitinen J, Power C, Jarvelin MR. Family social class, maternal body mass index, childhood body mass index, and age at menarche as predictors of adult obesity. *Am J Clin Nutr* 2001;74(3):287-94.
21. Sabatti C, Service SK, Hartikainen AL, et al. Genome-wide association analysis of metabolic traits in a birth cohort from a founder population. *Nat Genet* 2009;41(1):35-46.
22. Taponen S, Martikainen H, Jarvelin MR, et al. Metabolic cardiovascular disease risk factors in women with self-reported symptoms of oligomenorrhea and/or hirsutism: Northern Finland Birth Cohort 1966 Study. *J Clin Endocrinol Metab* 2004;89(5):2114-8.
23. Colditz GA, Hankinson SE. The Nurses' Health Study: lifestyle and health among women. *Nat Rev Cancer* 2005;5(5):388-96.
24. Hunter DJ, Kraft P, Jacobs KB, et al. A genome-wide association study identifies alleles in FGFR2 associated with risk of sporadic postmenopausal breast cancer. *Nat Genet* 2007;39(7):870-4.
25. Cornelis MC, Qi L, Zhang C, et al. Joint effects of common genetic variants on the risk for type 2 diabetes in U.S. men and women of European ancestry. *Annals of internal medicine* 2009;150(8):541-50.
26. Boomsma DI, de Geus EJ, Vink JM, et al. Netherlands Twin Register: from twins to twin families. *Twin research and human genetics : the official journal of the International Society for Twin Studies* 2006;9(6):849-57.
27. Boomsma DI, Willemsen G, Sullivan PF, et al. Genome-wide association of major depression: description of samples for the GAIN Major Depressive Disorder Study: NTR and NESDA biobank projects. *Eur J Hum Genet* 2008;16(3):335-42.

28. Anderson CA, Zhu G, Falchi M, et al. A genome-wide linkage scan for age at menarche in three populations of European descent. *J Clin Endocrinol Metab* 2008;93(10):3965-70.
29. Medland SE, Nyholt DR, Painter JN, et al. Common variants in the trichohyalin gene are associated with straight hair in Europeans. *American journal of human genetics* 2009;85(5):750-5.
30. Newnham JP, Evans SF, Michael CA, et al. Effects of frequent ultrasound during pregnancy: a randomised controlled trial. *Lancet* 1993;342(8876):887-91.
31. Hofman A, Breteler MM, van Duijn CM, et al. The Rotterdam Study: objectives and design update. *Eur J Epidemiol* 2007;22(11):819-29.
32. Hofman A, van Duijn CM, Franco OH, et al. The Rotterdam Study: 2012 objectives and design update. *Eur J Epidemiol* 2011;26(8):657-86.
33. Pilia G, Chen WM, Scuteri A, et al. Heritability of cardiovascular and personality traits in 6,148 Sardinians. *PLoS genetics* 2006;2(8):e132.
34. Willer CJ, Sanna S, Jackson AU, et al. Newly identified loci that influence lipid concentrations and risk of coronary artery disease. *Nat Genet* 2008;40(2):161-9.
35. Andrew T, Hart DJ, Snieder H, et al. Are twins and singletons comparable? A study of disease-related and lifestyle characteristics in adult women. *Twin research : the official journal of the International Society for Twin Studies* 2001;4(6):464-77.
36. Spector TD, Williams FM. The UK Adult Twin Registry (TwinsUK). *Twin research and human genetics : the official journal of the International Society for Twin Studies* 2006;9(6):899-906.
37. Spector TD, MacGregor AJ. The St. Thomas' UK Adult Twin Registry. *Twin research : the official journal of the International Society for Twin Studies* 2002;5(5):440-3.

38. Ridker PM, Chasman DI, Zee RY, et al. Rationale, design, and methodology of the Women's Genome Health Study: a genome-wide association study of more than 25,000 initially healthy american women. *Clin Chem* 2008;54(2):249-55.
39. Holm S. A Simple Sequentially Rejective Multiple Test Procedure. *Scand J Stat* 1979;6(2):65-70.
40. Benjamini Y, Hochberg Y. Controlling the False Discovery Rate - a Practical and Powerful Approach to Multiple Testing. *J Roy Stat Soc B Met* 1995;57(1):289-300.
41. Storey JD. A direct approach to false discovery rates. *J Roy Stat Soc B* 2002;64:479-98.
42. Dabney A, Storey J. Q-Value. 2008. (<http://genomics.princeton.edu/storeylab/qvalue/>). (Accessed June 1, 2012 2012).
43. Dastani Z, Hivert MF, Timpson N, et al. Novel loci for adiponectin levels and their influence on type 2 diabetes and metabolic traits: a multi-ethnic meta-analysis of 45,891 individuals. *PLoS genetics* 2012;8(3):e1002607.
44. Johnson T. Gtx: Genetics ToolboX. (<http://cran.r-project.org/web/packages/gtx/index.html>). (Accessed November 5, 2012).
45. Reimand J, Arak T, Vilo J. g:Profiler--a web server for functional interpretation of gene lists (2011 update). *Nucleic acids research* 2011;39(Web Server issue):W307-15.
46. Reimand J, Kull M, Peterson H, et al. g:Profiler--a web-based toolset for functional profiling of gene lists from large-scale experiments. *Nucleic acids research* 2007;35(Web Server issue):W193-200.
47. Rossin EJ, Lage K, Raychaudhuri S, et al. Proteins encoded in genomic regions associated with immune-mediated disease physically interact and suggest underlying biology. *PLoS genetics* 2011;7(1):e1001273.
48. Elks CE, Perry JR, Sulem P, et al. Thirty new loci for age at menarche identified by a meta-analysis of genome-wide association studies. *Nat Genet* 2010;42(12):1077-85.

49. Gauderman WJ, Morrison JM. QUANTO 1.1: A computer program for power and sample size calculations for genetic-epidemiology studies. 2006.
50. The ARIC Investigators. The Atherosclerosis Risk in Communities (ARIC) Study: design and objectives. *Am J Epidemiol.* 1989;129(4):687–702.



## WEB FIGURES

Web Figure 1A-D. Strategy for SNP Selection and Presentation

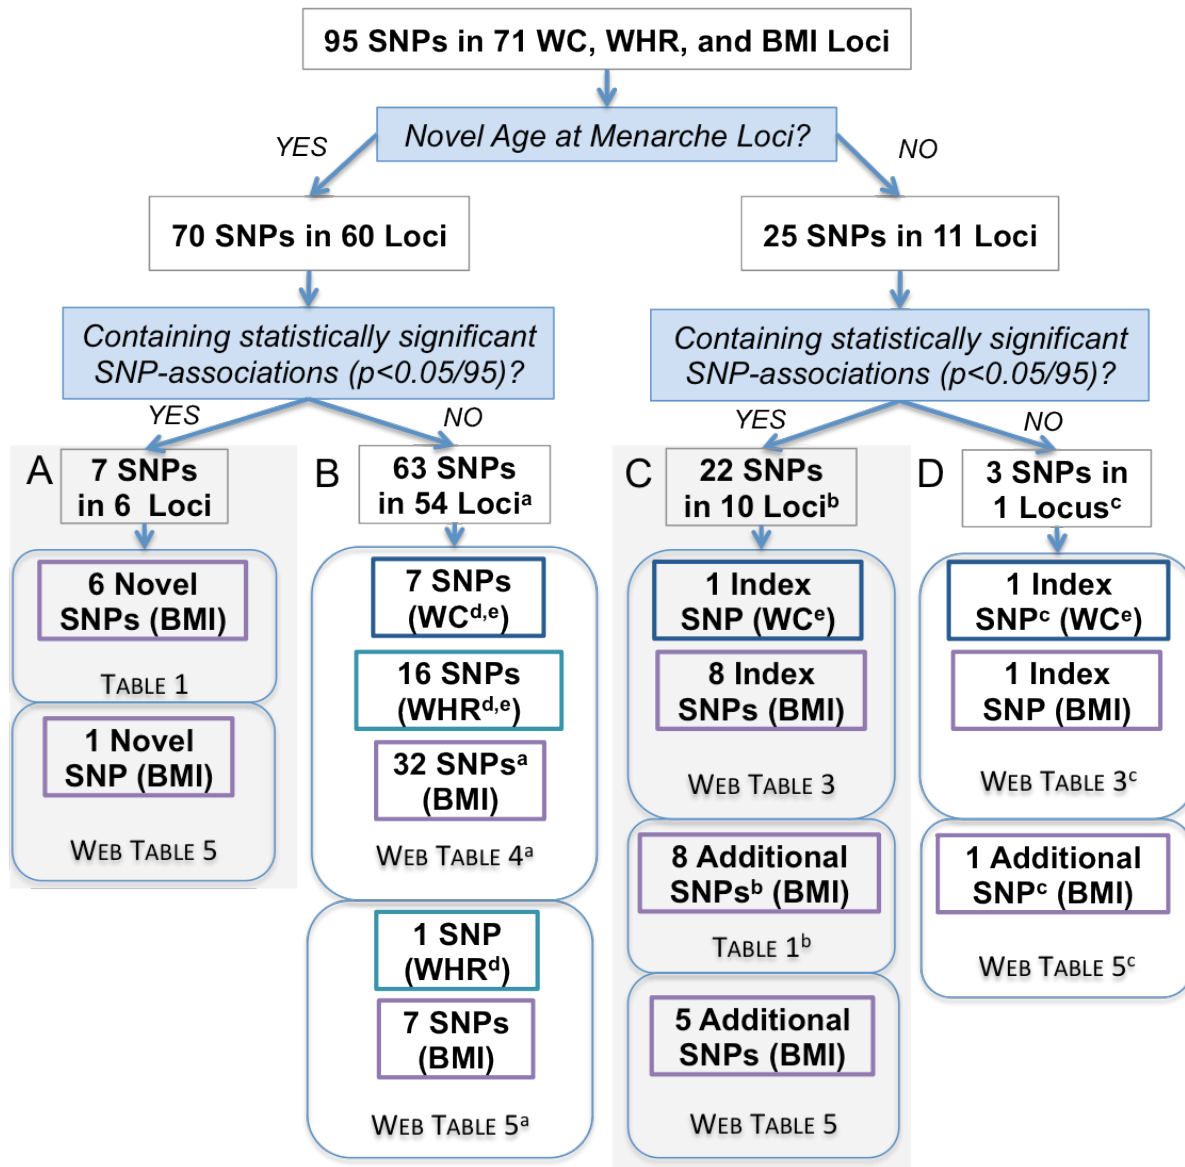

Abbreviations: AAM, Age at menarche; BMI, body mass index; SNP, single nucleotide polymorphism; WC, Waist circumference; WHR, Waist-hip-ratio

<sup>a</sup>Note that when the number loci is less than the number of SNPs as in Tables 1, and Web Table 4, some SNPs have been removed due to signal dependence and placed in Web Table 5. Two exceptions are detailed as follows. Loci redundancies are due, in part, to our methodologic approach to generating a list of candidate adiposity SNPs. In sum, 15 SNPs in linkage disequilibrium (LD;  $r^2 < 0.2$ ) with other SNPs in Table 1 (7 BMI SNPs) and Web Table 4 (1 WHR adjusted for BMI, and 7 BMI SNPs) are therefore presented in Web Table 3. In Web Table 4 the *MC4R* locus was considered to associate with two adiposity phenotypes: WC (rs489693) and BMI (rs12970134). Therefore, one additional BMI-SNP (rs12970134) at the *MC4R* locus is included in Web Table 4 (55 SNPs in 54 loci). In contrast, both the variants at *NRXN3* were considered to represent BMI (rs10150332 and rs10146997). Due to their tight LD ( $r^2 < 0.2$ ), the former is shown in Web Table 4 and the latter in Web Table 5. Phenotypic categorizations at these two loci were based on the reported change in WC effect after adjusting for BMI at these loci.

<sup>b</sup>Table 1 is shown here to contain eight additional SNPs, of which two are located at *BDNF* (rs7481311 and rs6265) and represent independent genetic signals based on our linkage disequilibrium criteria ( $r^2 < 0.2$ ). Therefore panel C is recorded to represent 10 loci in total.

<sup>c</sup>Each of the SNP-associations at previously reported age at menarche loci shown in panel D did not have evidence below a Bonferroni correction for multiple testing ( $P < 0.05/95$ ), but were nominally significant ( $P < 0.05$ ). Of these three SNPs, two SNPs (rs7647305 at *ETV5* in Web Table 4; rs6499640 at *FTO* in Web Table 5) were in linkage disequilibrium ( $r^2 < 0.2$ ) with at least one other SNP at the same locus with significant evidence of association ( $P < 0.05/95$ ). The lack of significance using these specific SNP markers may be an artifact of these SNPs being weaker markers of the underlying genetic effect at *ETV5* and *FTO*. For this reason panel D is only recorded to represent one locus (*MSRA*).

<sup>d</sup>Adjusted for BMI.

<sup>e</sup>Unadjusted for BMI.

**Web Figure 2A-B.** BMI-Age at Menarche-SNPs at Six Novel Loci by Decreasing Magnitude of Effect

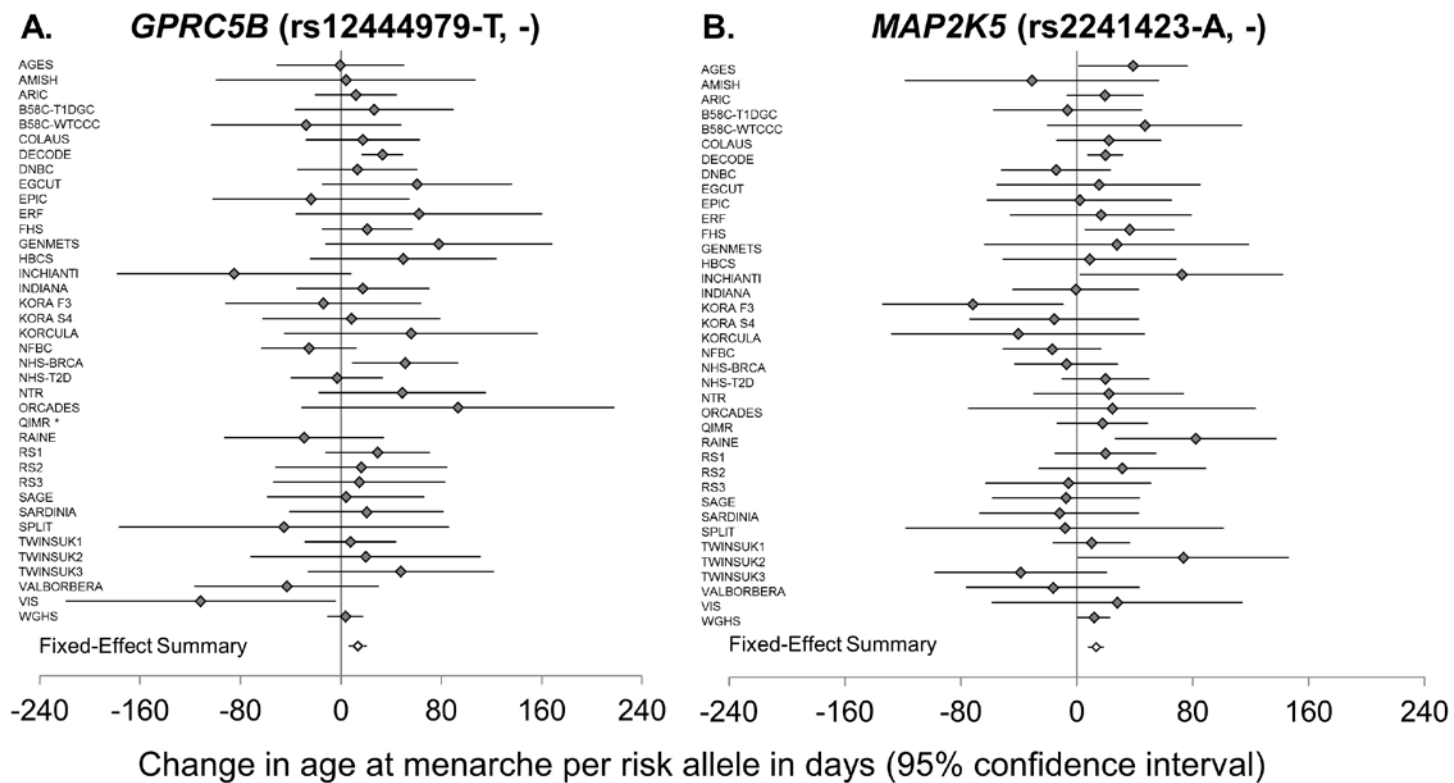

**Web Figure 2C-D. BMI-Age at Menarche-SNPs at Six Novel Loci by Decreasing Magnitude of Effect**

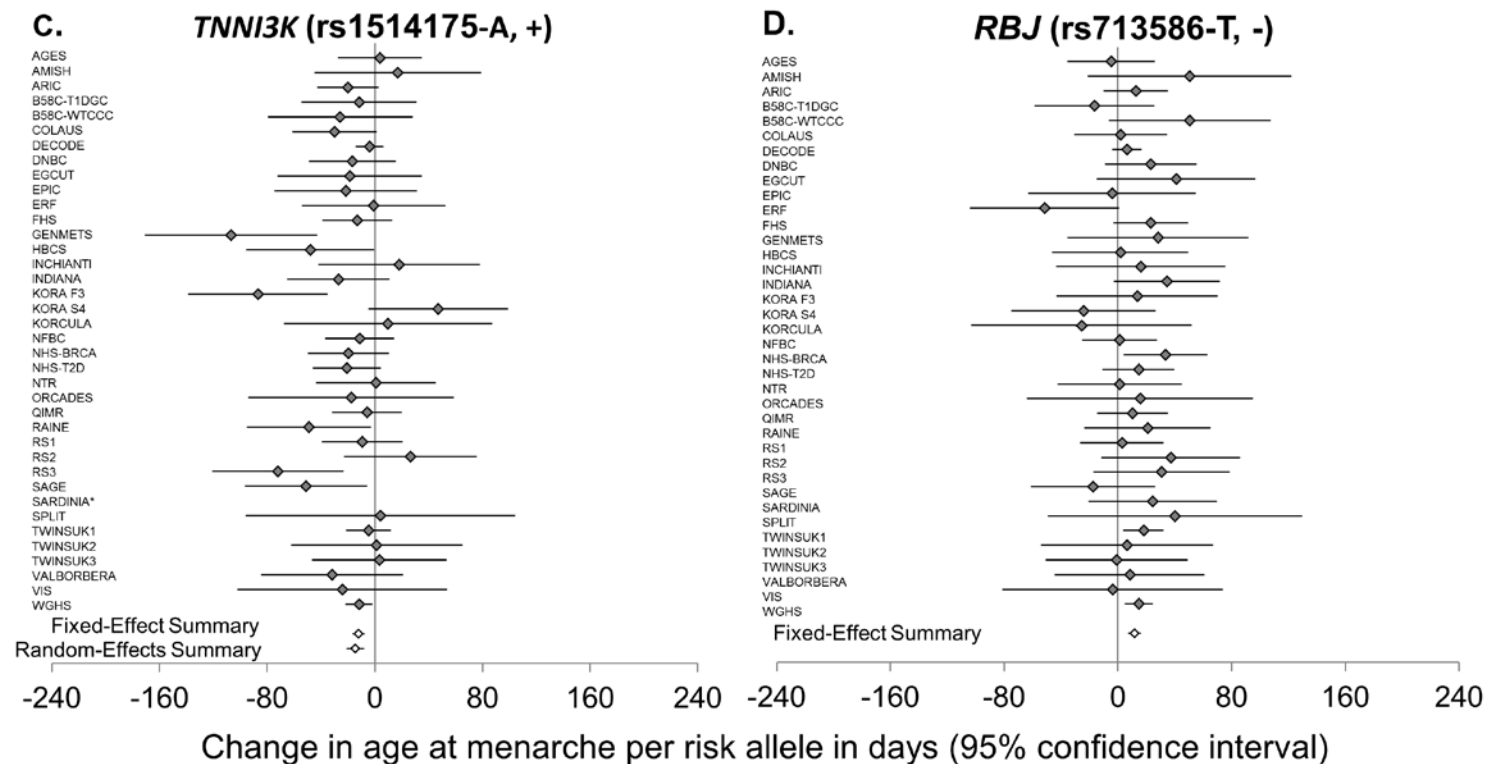

**Web Figure 2E-F. BMI-Age at Menarche-SNPs at Six Novel Loci by Decreasing Magnitude of Effect**

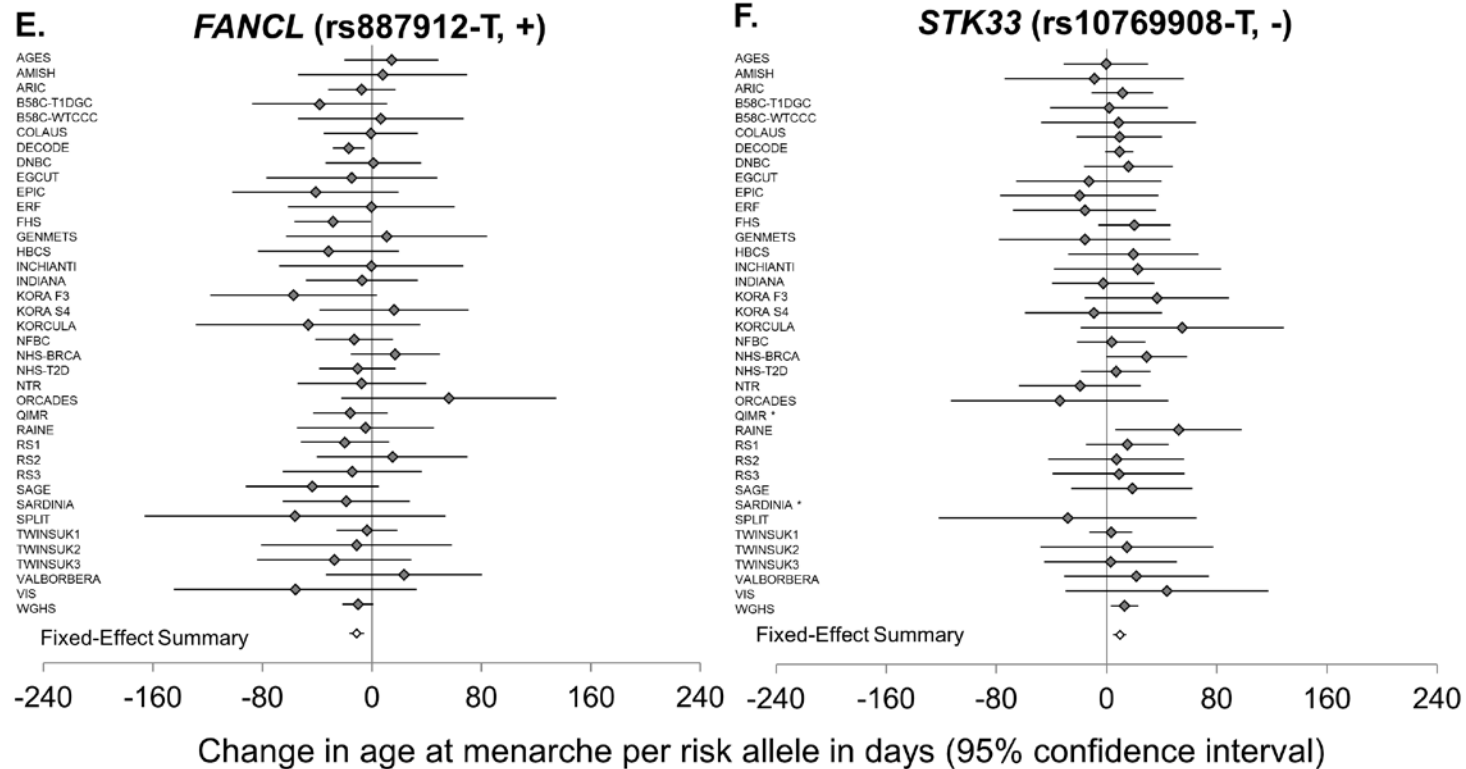

**Web Figure 3A-B.** Histogram (A) and Q-Q Plot (B) of the Distribution of  $P$  Values Among 95 Adiposity-SNPs

**(A) Histogram**

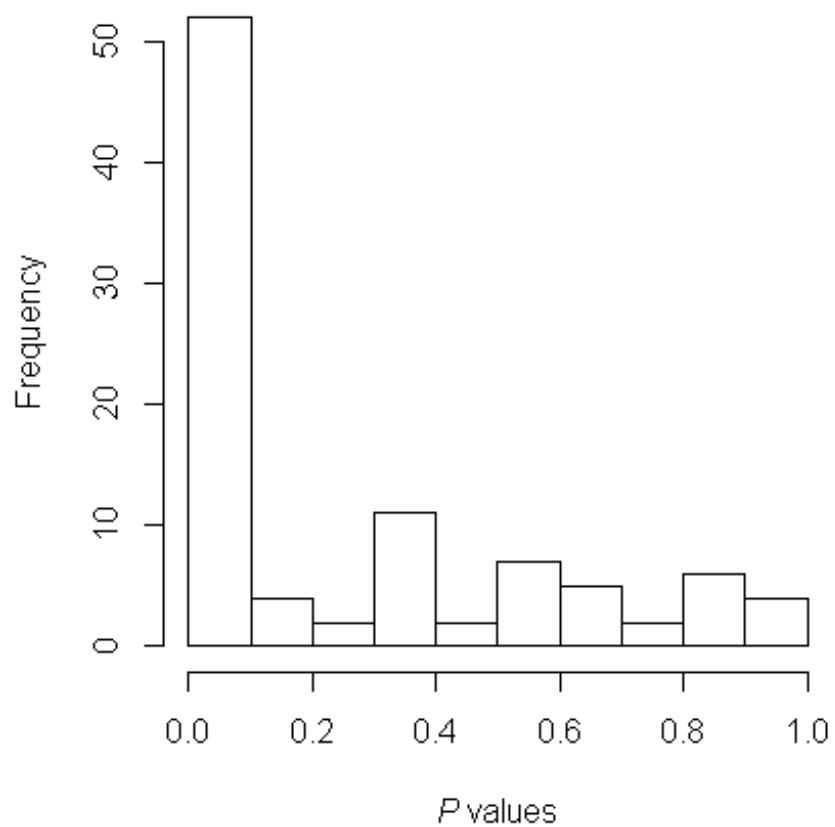

**(B) Q-Q plot**

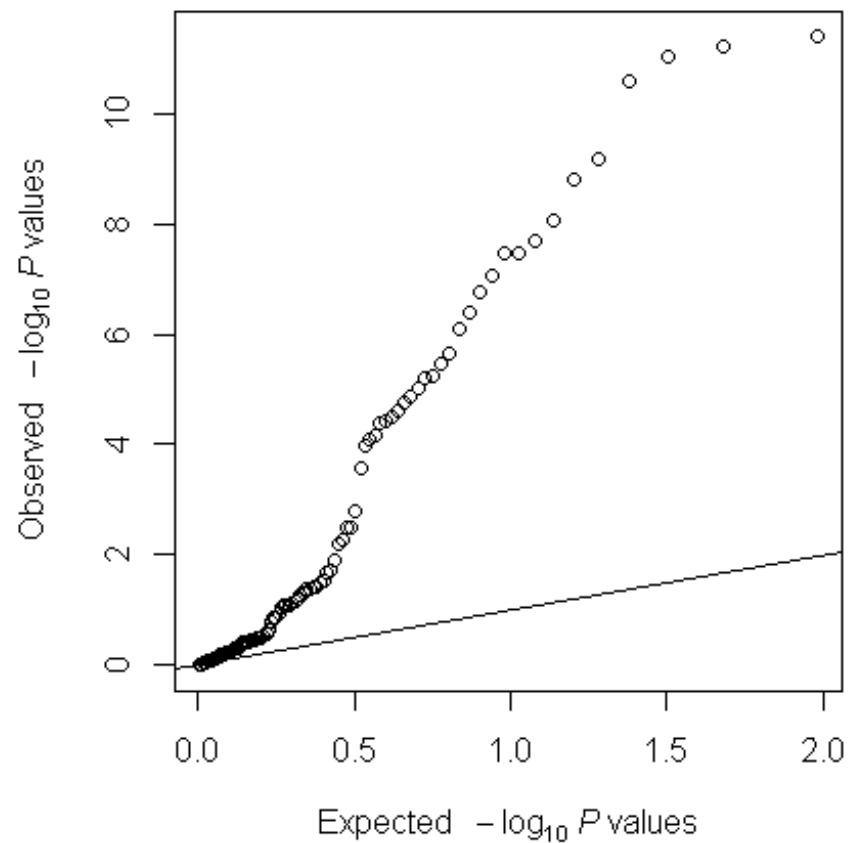

**Web Figure 4A-C.** Distribution and estimated decline in age at menarche in years per one risk allele increase in a genetic risk score (GRS) of BMI (A-C) and waist circumference/waist-hip-ratio genetic variants (D-F) in the Atherosclerosis Risk in Communities (ARIC) Study and the Women’s Genome Health Study (WGHS).

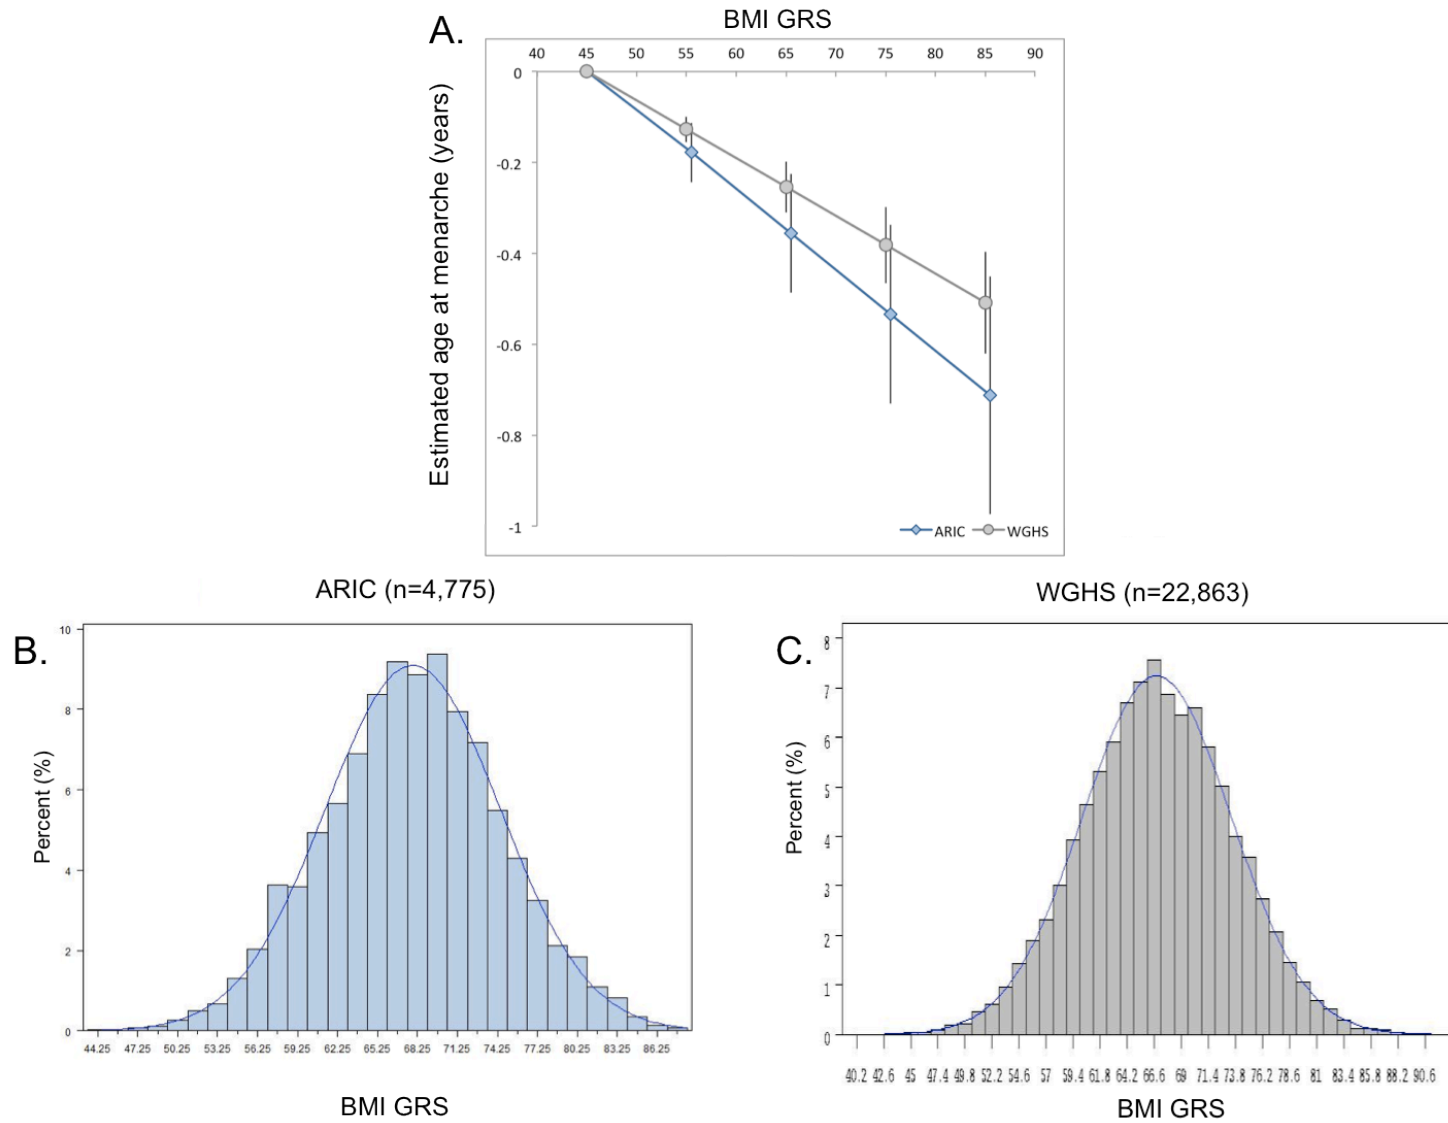

**Web Figure 4D-F.** Distribution and estimated decline in age at menarche in years per one risk allele increase in a genetic risk score (GRS) of BMI (A-C) and waist circumference/waist-hip-ratio genetic variants (D-F) in the Atherosclerosis Risk in Communities (ARIC) Study and the Women’s Genome Health Study (WGHS).

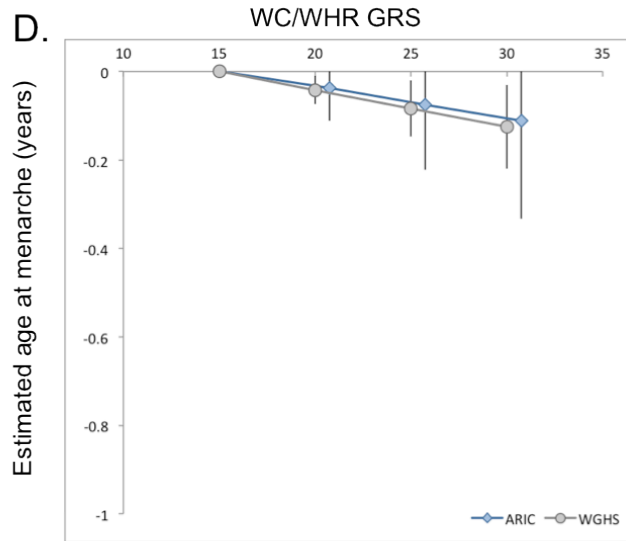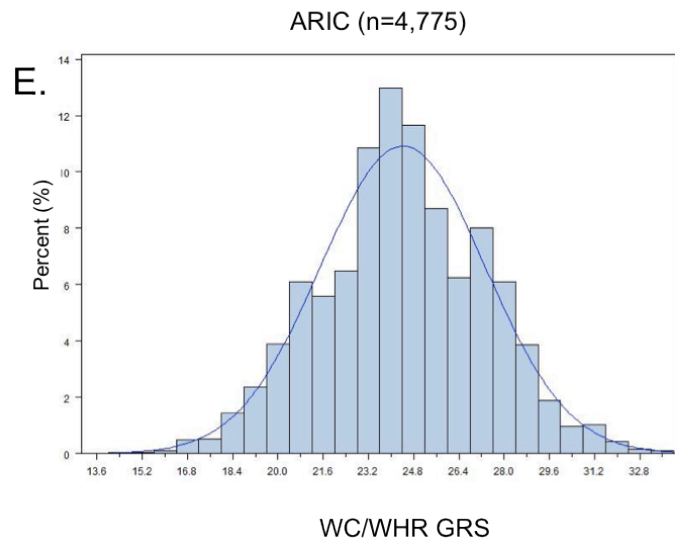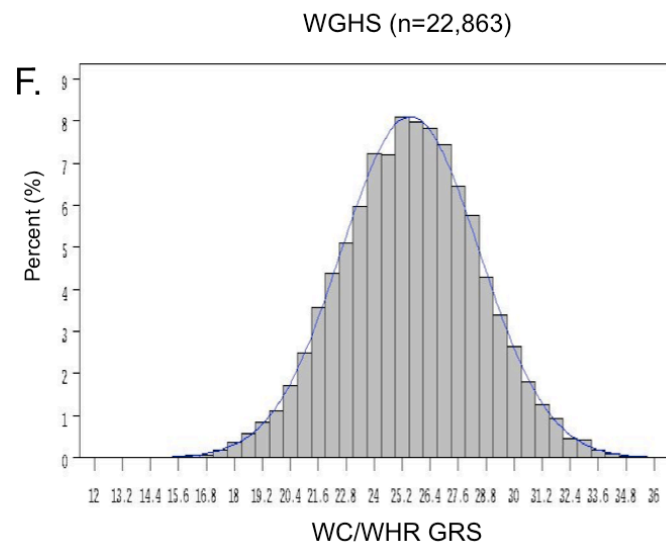

Abbreviations: ARIC, Atherosclerosis Risk in Communities Study; BMI, body mass index; GRS, genetic Risk Score; WC, waist circumference; WGHS, Women’s Genome Health Study; WHR, waist-hip-ratio.

Note: One BMI SNP was missing from both studies (rs545854) and therefore is not included in the BMI GRS.



**Web Figure 5.** DAPPLE Interaction Analysis of Waist Circumference and BMI SNPs Associated Significantly with Age at Menarche ( $\pm 300\text{kb}$  Window From Each Marker SNP)

Direct Interactions ( $P=0.034$ )

- *MCRS1* -- *LIN7C*
- *MCRS1* -- *RASAL2*
- *CENPO* -- *KIF18A*
- *SNTG2* -- *DTNB*
- *DNMT3A* -- *PIAS1*
- *RBL2* -- *TRA2B*

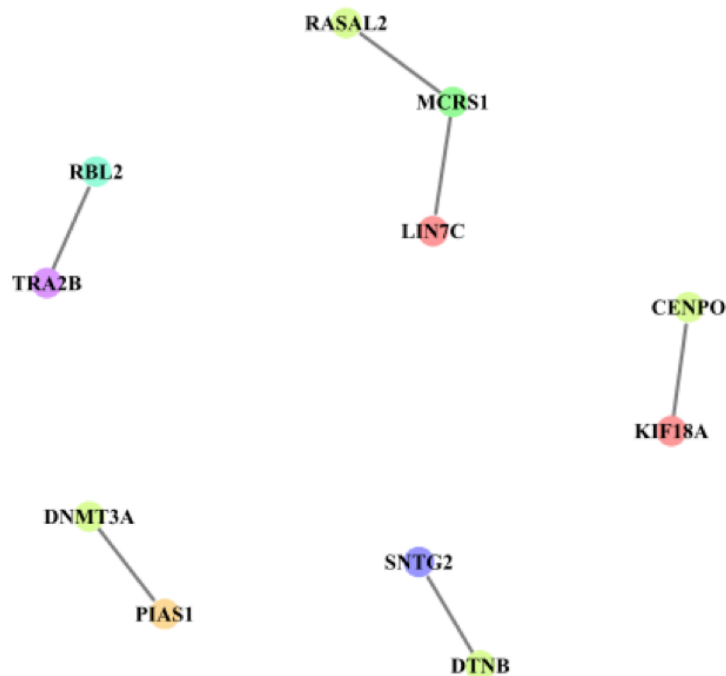

Indirect Interactions ( $P \geq 0.05$ )

| GENE         | REGION                          | $P_{\text{uncorrected}}$ | $P_{\text{corrected}}$ |
|--------------|---------------------------------|--------------------------|------------------------|
| <i>SNTG2</i> | rs2867125, rs6548238, rs7561317 | 0.032                    | 0.032                  |

<sup>a</sup>Neither rs545854 nor rs7826222 were recognized.

**Web Figure 6A-B.** Estimated Power to Detect Effects on Age at Menarche With a Set Sample of 86,000 Women at Nominal Significance (A;  $P < 0.05$ ) and After Bonferroni Adjustment for Multiple Tests (B;  $P < 0.05/95$ )<sup>a</sup>

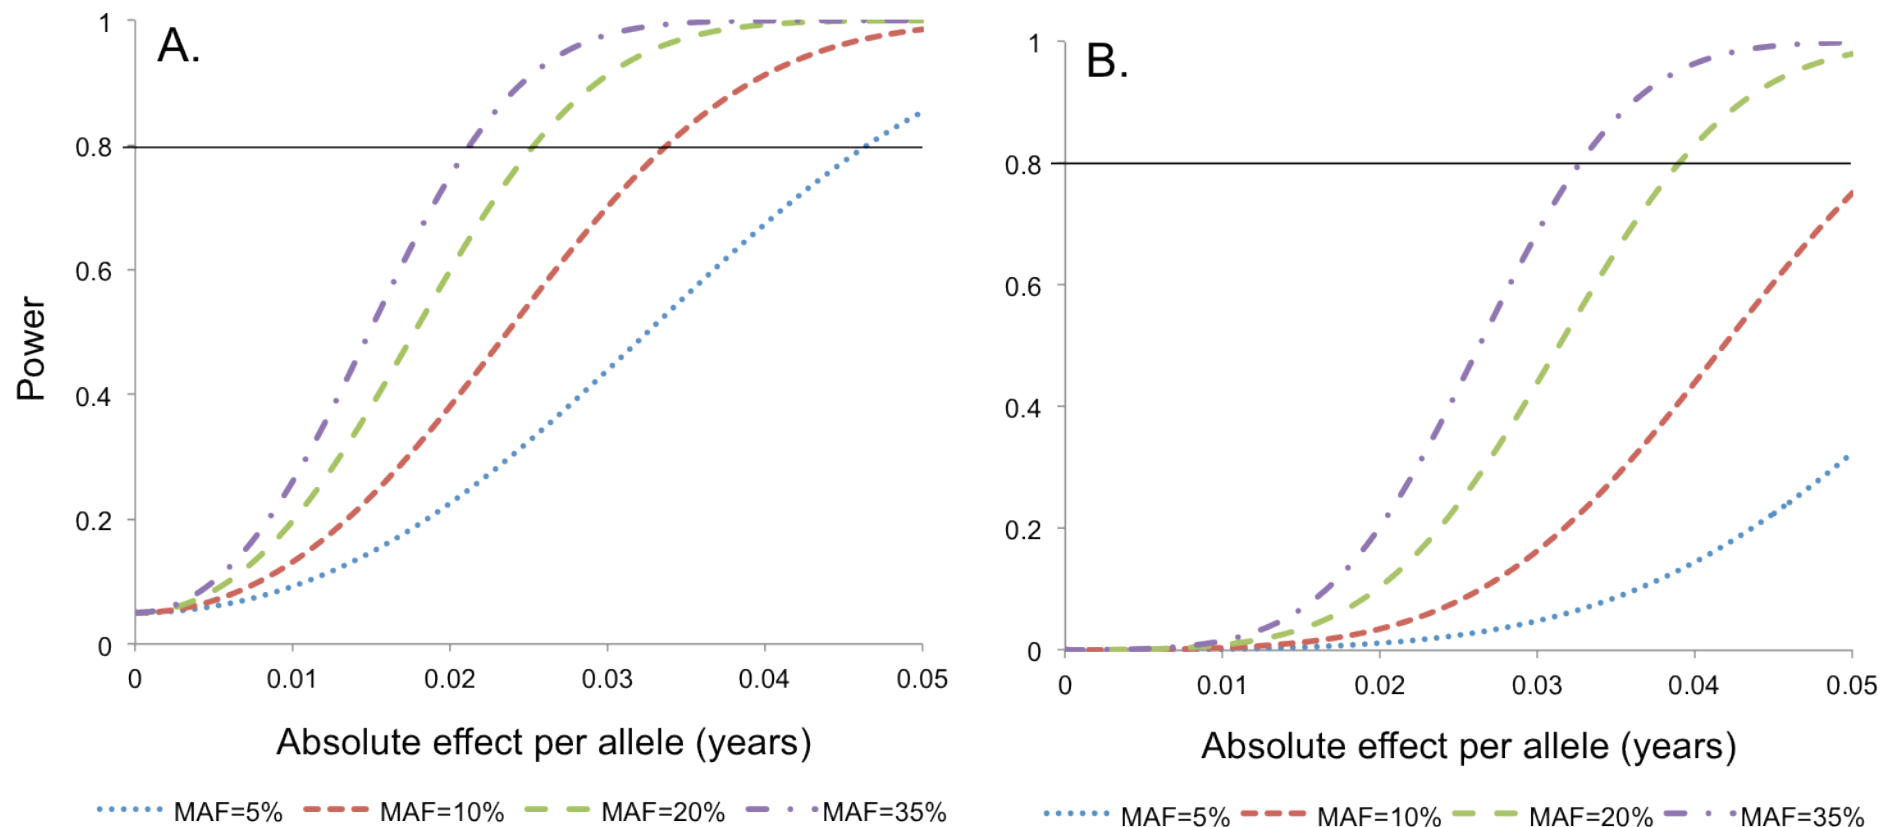

<sup>a</sup>Estimates of statistical power were based on a distribution of age at menarche of 12.9 years (standard deviation=1.5), additive gene effects, a sample of 86,000 unrelated individuals, and nominal significance ( $P < 0.05$ ). Because a range of effect sizes (8.4-18.2 day or 0.02-0.05 year-changes per allele) have been noted for age at menarche and only variants  $>1\%$  minor allele frequency were excluded, both parameters were allowed to vary.

## WEB TABLES

**Web Table 1.** Characteristics of Participating Studies of Women of European Descent in the ReproGen Consortium by Continent of Study Origin

| Full Study Name                                                   | Abbreviation | N     | Type                    | Isolate | Country of Origin        | Mean Birth Year (SD) | Data Collection Period | Mean Age (SD) | Mean AAM (SD) | Specific Menarche Questions                                                                                                                                                                                                                                                                                                    |
|-------------------------------------------------------------------|--------------|-------|-------------------------|---------|--------------------------|----------------------|------------------------|---------------|---------------|--------------------------------------------------------------------------------------------------------------------------------------------------------------------------------------------------------------------------------------------------------------------------------------------------------------------------------|
| <b>European Studies</b>                                           |              |       |                         |         |                          |                      |                        |               |               |                                                                                                                                                                                                                                                                                                                                |
| Age, Gene/Environment Susceptibility Study                        | AGES         | 1,849 | Population-based cohort | Yes     | Iceland                  | 1927 (5.6)           | 2002-2006              | 76.3 (5.5)    | 13.6 (1.3)    | "At what age did your menstrual periods begin?"                                                                                                                                                                                                                                                                                |
| 1958 British Birth Cohort- Type 1 Diabetes Genetics Consortium    | B58C-T1DGC   | 1,021 | Population-based cohort | No      | England, Wales, Scotland | 1958                 | 1974                   | 16.1 (0.2)    | 12.7 (1.4)    | "At what age did she [your daughter] have her first menstrual period?" with response categories "before 11th birthday" (coded as 10), "when aged 11", "aged 12", "aged 13", "aged 14", "aged 15 or more", "not yet commenced" (coded as 16), "commenced but don't know when" (excluded), "don't know if commenced" (excluded). |
| 1958 British Birth Cohort- Wellcome Trust Case Control Consortium | B58C-WTCCC   | 563   | Population-based cohort | No      | England, Wales, Scotland | 1958                 | 1974                   | 16.1 (0.2)    | 12.8 (1.3)    | "At what age did she [your daughter] have her first menstrual period?" with response categories "before 11th birthday"                                                                                                                                                                                                         |

|                                                                                                                      |                                      |        |                                |     |                                                        |                |           |                |               |                                                                                                                                                                                                                                                |
|----------------------------------------------------------------------------------------------------------------------|--------------------------------------|--------|--------------------------------|-----|--------------------------------------------------------|----------------|-----------|----------------|---------------|------------------------------------------------------------------------------------------------------------------------------------------------------------------------------------------------------------------------------------------------|
|                                                                                                                      |                                      |        |                                |     |                                                        |                |           |                |               | (coded as 10),<br>"when aged 11",<br>"aged 12", "aged<br>13", "aged 14",<br>"aged 15 or more",<br>"not yet<br>commenced"<br>(coded as 16),<br>"commenced but<br>don't know when"<br>(excluded), "don't<br>know if<br>commenced"<br>(excluded). |
| Cohorte<br>LAUSannoise                                                                                               | COLAUS                               | 2,797  | Population-<br>based<br>cohort | No  | Switzer-<br>land                                       | 1951<br>(10.8) | 2003-2006 | 53.4<br>(10.8) | 13.2<br>(1.6) | "At what age did<br>you have your first<br>period?"                                                                                                                                                                                            |
| deCODE Genetics<br>Study                                                                                             | DECODE                               | 15,864 | Population-<br>based<br>cohort | No  | Iceland                                                | 1948<br>(17.0) | 1970-2008 | 48.1<br>(7.1)  | 13.2<br>(1.3) | "How old were you<br>when your<br>menstruation<br>started?"                                                                                                                                                                                    |
| Danish National<br>Birth Cohort                                                                                      | DNBC                                 | 1,748  | Population-<br>based<br>cohort | No  | Denmark                                                | 1970<br>(4.4)  | 1996-2002 | 30.0<br>(4.3)  | 13.3<br>(1.3) | "How old were you<br>when you had<br>your first<br>menstrual period?"                                                                                                                                                                          |
| Estonian Genome<br>Center, University<br>of Tartu                                                                    | EGCUT                                | 983    | Population-<br>based<br>cohort | Yes | Estonia                                                | 1963<br>(16.0) | 2003-2010 | 41.2<br>(16.5) | 13.4<br>(1.5) | "How old you were<br>when you had<br>your first<br>menstruation?"                                                                                                                                                                              |
| European<br>Prospective<br>Investigation into<br>Cancer and<br>Nutrition- Obesity<br>case-cohort study<br>(Controls) | EPIC-COHORT                          | 1,215  | Nested<br>Case<br>Control      | No  | England,<br>Wales,<br>Scotland,<br>Northern<br>Ireland | 1936<br>(9.1)  | 1993-1997 | 58.7<br>(9.0)  | 12.9<br>(1.8) | "How old were you<br>when you had<br>your first<br>menstrual period?"                                                                                                                                                                          |
| Erasmus Rucphen<br>Family study                                                                                      | ERF                                  | 1,103  | Family-<br>based<br>cohort     | Yes | Nether-<br>lands                                       | 1957<br>(14.4) | 2002      | 47.5<br>(14.3) | 13.1<br>(1.7) | "At what age did<br>your menstrual<br>periods begin?"                                                                                                                                                                                          |
| Health2000 cohort-<br>control subsample                                                                              | Health 2000<br>(GENMETS)<br>controls | 465    | Controls                       | No  | Finland                                                | 1948<br>(11.6) | 2000-2001 | 51.9<br>(11.6) | 13.4<br>(1.6) | "How old were you<br>when your periods<br>started?"                                                                                                                                                                                            |

|                                                       |           |       |                         |     |             |                |           |                |               |                                                                       |
|-------------------------------------------------------|-----------|-------|-------------------------|-----|-------------|----------------|-----------|----------------|---------------|-----------------------------------------------------------------------|
| Helsinki Birth Cohort Study                           | HBCS      | 976   | Population-based cohort | Yes | Finland     | 1941<br>(2.9)  | 2000-2002 | 61.5<br>(3.0)  | 12.8<br>(1.5) | "At what age did your menstrual periods start?"                       |
| InCHIANTI Study                                       | INCHIANTI | 597   | Population-based cohort | No  | Italy       | 1930<br>(15.4) | 1998-2000 | 68.2<br>(15.5) | 13.3<br>(1.5) | "How old were you when you had your first menstrual period?"          |
| Italian Network of Isolated Populations-Val Borbera   | INGI-VB   | 910   | Population-based cohort | Yes | Italy       | 1951<br>(18.4) | 2005-2008 | 54.4<br>(18.3) | 12.9<br>(1.5) | "What was your age at menarche?"                                      |
| Cooperative Health Research in the Region of Augsburg | KORA F3   | 809   | Population-based cohort | No  | Germany     | 1942<br>(10.1) | 2004-2005 | 61.8<br>(10.1) | 13.7<br>(1.5) | "At what age did you have your first menstruation/period (menarche)?" |
| Cooperative Health Research in the Region of Augsburg | KORA S4   | 898   | Population-based cohort | No  | Germany     | 1946<br>(8.8)  | 1999-2001 | 53.5<br>(8.8)  | 13.5<br>(1.5) | "At what age did you have your first menstruation/period (menarche)?" |
| CROATIA-Korcula                                       | KORCULA   | 508   | Population-based cohort | Yes | Croatia     | 1952<br>(14.0) | 2007      | 54.9<br>(13.2) | 13.7<br>(1.6) | "Age at menarche?__"                                                  |
| Northern Finland Birth Cohort 1966                    | NFBC      | 2,648 | Population-based cohort | Yes | Finland     | 1966           | 1997-1998 | 31.2<br>(0.4)  | 12.9<br>(1.3) | "How old were you when you started menstruating?"                     |
| Netherlands Twin Register                             | NTR       | 1,051 | Family-based cohort     | No  | Netherlands | 1961<br>(13.7) | 1991-2008 | 44.6<br>(13.6) | 13.2<br>(1.4) | "How old were you when you had your first menstrual period?"          |
| Orkney Complex Disease Study                          | ORCADES   | 348   | Population-based cohort | Yes | Scotland    | 1955<br>(15.6) | 2005-2007 | 52.7<br>(15.3) | 12.8<br>(1.4) | "How old were you when you had your first menstrual period?"          |
| Rotterdam Study 1                                     | RS1       | 3,175 | Population-based cohort | No  | Netherlands | 1922<br>(9.4)  | 1989-1993 | 69.6<br>(9.3)  | 13.5<br>(1.6) | "How old were you when you had your first menstrual period?"          |
| Rotterdam Study 2                                     | RS2       | 1,119 | Population-based cohort | No  | Netherlands | 1935<br>(8.2)  | 2000-2001 | 65.1<br>(8.4)  | 13.3<br>(1.6) | "How old were you when you had your first menstrual period?"          |

|                                           |          |       |                         |     |                                            |                |           |                |               |                                                              |
|-------------------------------------------|----------|-------|-------------------------|-----|--------------------------------------------|----------------|-----------|----------------|---------------|--------------------------------------------------------------|
| Rotterdam Study 3                         | RS3      | 1,112 | Population-based cohort | No  | Netherlands                                | 1951<br>(6.1)  | 2006-2008 | 56.2<br>(6.1)  | 13.1<br>(1.6) | "How old were you when you had your first menstrual period?" |
| SardiNIA genome-wide association study    | SARDINIA | 2,158 | Family-based cohort     | Yes | Italy                                      | 1958<br>(17.4) | 2001-2008 | 43.9<br>(17.2) | 13.2<br>(1.6) | "At what age did your menstrual periods begin?"              |
| CROATIA-Split                             | SPLIT    | 283   | Population-based cohort | No  | Croatia                                    | 1960<br>(14.0) | 2009-2010 | 49.8<br>(13.9) | 13.5<br>(1.5) | "Age at menarche?__"                                         |
| Twins United Kingdom Cohort I             | TWINSUK1 | 2,276 | Family-based cohort     | No  | England, Wales, Scotland, Northern Ireland | 1951<br>(12.7) | 1992-2001 | 58.2<br>(12.7) | 13.0<br>(1.6) | "How old were you when you had your first menstrual period?" |
| Twins United Kingdom Cohort II            | TWINSUK2 | 671   | Family-based cohort     | No  | England, Wales, Scotland, Northern Ireland | 1954<br>(14.6) | 1992-2001 | 55.4<br>(14.6) | 13.1<br>(1.6) | "How old were you when you had your first menstrual period?" |
| Twins United Kingdom Cohort III           | TWINSUK3 | 1,016 | Family-based cohort     | No  | England, Wales, Scotland, Northern Ireland | 1947<br>(11.6) | 1992-2001 | 62.4<br>(11.6) | 12.9<br>(1.5) | "How old were you when you had your first menstrual period?" |
| CROATIA-Vis                               | VIS      | 502   | Population-based cohort | Yes | Croatia                                    | 1947<br>(15.8) | 2003-2004 | 56.6<br>(15.8) | 13.6<br>(1.6) | "Age at menarche?__"                                         |
| <b>Non-European Studies</b>               |          |       |                         |     |                                            |                |           |                |               |                                                              |
| Old Order Amish Cohort                    | AMISH    | 557   | Family-based cohort     | Yes | United States                              | 1953<br>(16.2) | 1997-2009 | 49.1<br>(3.7)  | 13.1<br>(1.3) | "How old were you when you had your first menstrual period?" |
| Atherosclerosis Risk in Communities Study | ARIC     | 4,775 | Population-based cohort | No  | United States                              | 1934<br>(5.8)  | 1987-1989 | 53.9<br>(5.7)  | 12.9<br>(1.5) | "How old were you when you had your first menstrual period?" |

|                                                                 |          |        |                         |    |               |                |                         |                |               |                                                                                                                                                                       |
|-----------------------------------------------------------------|----------|--------|-------------------------|----|---------------|----------------|-------------------------|----------------|---------------|-----------------------------------------------------------------------------------------------------------------------------------------------------------------------|
| Framingham Heart Study                                          | FHS      | 3,801  | Population-based cohort | No | United States | 1951<br>(15.8) | 1970-1983,<br>2002-2005 | 42.5<br>(10.1) | 12.8<br>(1.5) | "Age at start of menses? ____, How old were you when you had your first menstrual period (menses)?, About how old were you when you had your first menstrual period?" |
| Indiana University premenopausal Caucasian women peak BMD study | INDIANA  | 1,497  | Family-based cohort     | No | United States | 1965<br>(8.1)  | 1994-2004               | 33.3<br>(7.2)  | 12.6<br>(1.4) | "At what age did your periods begin? __ Years old."                                                                                                                   |
| Nurses' Health Study                                            | NHS-BRCA | 2,270  | Nested case control     | No | United States | 1931<br>(6.4)  | 1976                    | 56.8<br>(6.4)  | 12.5<br>(1.4) | "At what age did your menstrual periods begin?"                                                                                                                       |
| Nurses' Health Study                                            | NHS-T2D  | 3,090  | Nested case control     | No | United States | 1932<br>(6.9)  | 1976                    | 55.7<br>(6.7)  | 12.5<br>(1.4) | "At what age did your menstrual periods begin?"                                                                                                                       |
| Queensland Institute of Medical Research                        | QIMR     | 3528   | Family-based cohort     | No | Australia     | 1965<br>(19.0) | 1982-2010               | 32.1<br>(11.4) | 13.1<br>(1.3) | "How old were you when you had your first menstrual period?"                                                                                                          |
| Western Australian Pregnancy cohort                             | RAINE    | 614    | Population-based cohort | No | Australia     | 1990<br>(0.8)  | 2000-2006               | 12.7<br>(1.1)  | 12.7<br>(1.1) | "What date did your daughter have her first period? __/__/__"                                                                                                         |
| Study of Addiction: Genetics and Environment                    | SAGE     | 1,291  | Population-based cohort | No | United States | 1963<br>(55.6) | 1997-2006               | 38.4<br>(9.1)  | 12.8<br>(1.6) | "At what age did you have your first menstrual period?"                                                                                                               |
| Women's Genome Health Study                                     | WGHS     | 22,028 | Population-based cohort | No | United States | 1939<br>(7.2)  | 1992-1994               | 54.7<br>(7.1)  | 12.4<br>(1.4) | "At what age did your menstrual periods begin?" with response categories "9 or younger; 10; 11; 12; 13; 14; 15; 16; 17 or older."                                     |
| <i>Overall<sup>a</sup></i>                                      |          | 92,116 |                         |    |               |                |                         |                |               |                                                                                                                                                                       |

Abbreviations: CI, Confidence interval; SD, Standard deviation

<sup>a</sup>The overall total is an estimate of the maximum sample size available from each study. However, due to variable quality control measures at each SNP, this sum contains 11 more samples than the largest SNP meta-analysis in this study (n=92,105).



**Web Table 2. Summary of 95 Candidate Adiposity SNPs Available in the Literature as of August 11, 2011**

| SNP ID     | Chromosome:<br>Position <sup>a</sup> (bp) | Nearest Genes     | Reference                      | Coded Allele | Previous Effect Size <sup>b</sup> | Phenotype        | P-value             | Notes on Effect Shown     |
|------------|-------------------------------------------|-------------------|--------------------------------|--------------|-----------------------------------|------------------|---------------------|---------------------------|
| rs3934834  | 1 995,669                                 |                   | Johansson et al.               | G            | 0.11                              | BMI              | 6x10 <sup>-7</sup>  |                           |
| rs2568958  | 1 72,537,704                              | NEGR1             | Thorleifson et al.             | A            | 3.77 (% SD)                       | BMI, weight      | 1x10 <sup>-11</sup> | BMI                       |
| rs2815752  | 1 72,585,028                              | NEGR1             | Willer et al./Speliotes et al. | A            | 0.13                              | BMI              | 2x10 <sup>-22</sup> | BMI from Speliotes et al. |
| rs1514175  | 1 74,764,232                              | TNNI3K            | Speliotes et al.               | A            | 0.07                              | BMI              | 8x10 <sup>-14</sup> |                           |
| rs1555543  | 1 96,717,385                              | PTBP2             | Speliotes et al.               | C            | 0.06                              | BMI              | 4x10 <sup>-10</sup> |                           |
| rs10783050 | 1 96,809,671                              |                   | Thorleifson et al.             | C            | 2.6 (% SD)                        | BMI              | 4x10 <sup>-6</sup>  |                           |
| rs984222   | 1 119,305,366                             | TBX15-WARS2       | Heid et al.                    | G            | 0.034                             | WHR              | 9x10 <sup>-25</sup> |                           |
| rs1011731  | 1 170,613,171                             | DNM3-PIGC         | Heid et al.                    | G            | 0.028                             | WHR              | 1x10 <sup>-17</sup> |                           |
| rs543874   | 1 176,156,103                             | SEC16B            | Speliotes et al.               | G            | 0.22                              | BMI              | 4x10 <sup>-23</sup> |                           |
| rs10913469 | 1 176,180,142                             | SEC16B, RASAL2    | Thorleifson et al.             | C            | 3.36 (% SD)                       | BMI, weight      | 6x10 <sup>-8</sup>  | BMI                       |
| rs2605100  | 1 217,710,847                             | LYPLAL1           | Lindgren et al.                | G            | 0.040 (z-score)                   | WHR <sup>c</sup> | 3x10 <sup>-8</sup>  | Women                     |
| rs4846567  | 1 217,817,340                             | LYPLAL1           | Heid et al.                    | G            | 0.034                             | WHR              | 5x10 <sup>-33</sup> | Women                     |
| rs6429082  | 1 233,666,752                             | TBCE              | Lindgren et al.                | C            | NR                                | WC <sup>c</sup>  | 3x10 <sup>-7</sup>  |                           |
| rs2867125  | 2 612,827                                 | TMEM18            | Speliotes et al.               | C            | 0.31                              | BMI              | 3x10 <sup>-49</sup> |                           |
| rs6548238  | 2 624,905                                 | TMEM18            | Willer et al.                  | C            | 0.26                              | BMI              | 1x10 <sup>-18</sup> |                           |
| rs7561317  | 2 634,953                                 | TMEM18            | Thorleifson et al.             | G            | 6.12 (% SD)                       | BMI, weight      | 4x10 <sup>-12</sup> | BMI                       |
| rs713586   | 2 25,011,512                              | RBJ               | Speliotes et al.               | C            | 0.14                              | BMI              | 6x10 <sup>-22</sup> |                           |
| rs887912   | 2 59,156,381                              | FANCL             | Speliotes et al.               | T            | 0.10                              | BMI              | 2x10 <sup>-12</sup> |                           |
| rs2890652  | 2 142,676,401                             | LRP1B             | Speliotes et al.               | C            | 0.09                              | BMI              | 1x10 <sup>-10</sup> |                           |
| rs10195252 | 2 165,221,337                             | GRB14             | Heid et al.                    | T            | 0.033                             | WHR              | 4x10 <sup>-24</sup> |                           |
| rs824931   | 2 222,509,943                             |                   | Johansson et al.               | G            | 0.07 kg                           | BMI              | 3x10 <sup>-6</sup>  |                           |
| rs6784615  | 3 52,481,466                              | NISCH-STAB1       | Heid et al.                    | T            | 0.043                             | WHR              | 4x10 <sup>-10</sup> |                           |
| rs6795735  | 3 64,680,405                              | ADAMTS9           | Heid et al.                    | C            | 0.025                             | WHR              | 2x10 <sup>-16</sup> | Women                     |
| rs1024889  | 3 70,546,020                              |                   | Johansson et al.               | G            | 0.12 (kg)                         | BMI              | 6x10 <sup>-6</sup>  | Women                     |
| rs13078807 | 3 85,966,840                              | CADM2             | Speliotes et al.               | G            | 0.10                              | BMI              | 4x10 <sup>-11</sup> |                           |
| rs1875517  | 3 118,790,257                             |                   | Fox et al.                     | NR           | NR                                | WC               | 2x10 <sup>-6</sup>  |                           |
| rs7647305  | 3 187,316,984                             | SFS10, ETV5, DGKG | Thorleifson et al.             | C            | 4.42 (% SD)                       | BMI, weight      | 7x10 <sup>-11</sup> | BMI                       |
| rs9816226  | 3 187,317,193                             | ETV5              | Speliotes et al.               | T            | 0.14                              | BMI              | 2x10 <sup>-18</sup> |                           |
| rs1152846  | 3 189,903,591                             |                   | Johansson et al.               | G            | -0.09 (kg)                        | BMI, weight      | 3x10 <sup>-6</sup>  | BMI                       |
| rs10938397 | 4 44,877,284                              | GNPDA2            | Willer et al./Speliotes et al. | G            | 0.18                              | BMI              | 4x10 <sup>-31</sup> | BMI from Speliotes        |

|                       |    |             |                   |                                  |    |                |                      |                     |                                 |
|-----------------------|----|-------------|-------------------|----------------------------------|----|----------------|----------------------|---------------------|---------------------------------|
|                       |    |             |                   |                                  |    |                |                      |                     | et al.                          |
| rs13107325            | 4  | 103,407,732 | <i>SLC39A8</i>    | Speliotes et al.                 | T  | 0.19           | BMI                  | 2x10 <sup>-13</sup> |                                 |
| rs2383393             | 4  | 180,901,647 |                   | Johansson et al.                 | G  | 0.1 (kg)       | BMI                  | 2x10 <sup>-6</sup>  | Women                           |
| rs4701252             | 5  | 21,814,911  | <i>CDH12</i>      | Heard-Costa et al.               | NR | NR             | WC                   | 2x10 <sup>-6</sup>  |                                 |
| rs2112347             | 5  | 75,050,998  | <i>FLJ35779</i>   | Speliotes et al.                 | T  | 0.10           | BMI                  | 2x10 <sup>-13</sup> |                                 |
| rs4836133             | 5  | 124,360,002 | <i>ZNF608</i>     | Speliotes et al.                 | A  | 0.07           | BMI                  | 2x10 <sup>-9</sup>  |                                 |
| rs6861681             | 5  | 173,295,064 | <i>CPEB4</i>      | Heid et al.                      | A  | 0.022          | WHR                  | 2x10 <sup>-9</sup>  |                                 |
| rs12517906            | 5  | 180,103,425 | <i>MGAT1</i>      | Johansson et al.                 | G  | -0.16 (kg)     | BMI, weight          | 6x10 <sup>-6</sup>  | BMI;<br>Women                   |
| rs1294421             | 6  | 6,688,148   | <i>LY86</i>       | Heid et al.                      | G  | 0.028          | WHR                  | 2x10 <sup>-17</sup> |                                 |
| rs2076529             | 6  | 32,471,933  | <i>BTNL2</i>      | Heid et al.                      | C  | 0.020          | WHR                  | 4x10 <sup>-7</sup>  |                                 |
| rs206936              | 6  | 34,410,847  | <i>NUDT3</i>      | Speliotes et al.                 | G  | 0.06           | BMI                  | 3x10 <sup>-8</sup>  |                                 |
| rs6905288             | 6  | 43,866,851  | <i>VEGFA</i>      | Heid et al.                      | A  | 0.026          | WHR                  | 2x10 <sup>-26</sup> |                                 |
| rs987237              | 6  | 50,911,009  | <i>TFAP2B</i>     | Lindgren et al./Speliotes et al. | G  | 0.13           | WC <sup>c</sup> /BMI | 3x10 <sup>-20</sup> | BMI from<br>Speliotes<br>et al. |
| rs1555967             | 6  | 51,267,954  | <i>PKHD1</i>      | Heard-Costa et al.               | NR | NR             | WC                   | 3x10 <sup>-6</sup>  |                                 |
| rs9491696             | 6  | 127,494,332 | <i>RSPO3</i>      | Heid et al.                      | G  | 0.042          | WHR                  | 2x10 <sup>-32</sup> | Women                           |
| rs2275215             | 6  | 129,903,085 | <i>LAMA2</i>      | Liu et al.                       | T  | -0.09 (SD)     | BMI                  | 4x10 <sup>-7</sup>  |                                 |
| rs1055144             | 7  | 25,837,634  | <i>NFE2L3</i>     | Heid et al.                      | T  | 0.040          | WHR                  | 1x10 <sup>-24</sup> |                                 |
| rs1106683             | 7  | 131,104,065 |                   | Fox et al.                       | NR | NR             | BMI                  | 1x10 <sup>-7</sup>  |                                 |
| rs1106684             | 7  | 131,104,205 |                   | Fox et al.                       | ?  | NR             | BMI                  | 2x10 <sup>-6</sup>  |                                 |
| rs545854 <sup>d</sup> | 8  | 9,897,490   | <i>MSRA</i>       | Lindgren et al.                  | G  | 0.04 (z-score) | WC <sup>c</sup>      | 9x10 <sup>-9</sup>  |                                 |
| rs4471028             | 8  | 75,457,530  | <i>GDAP1</i>      | Fox et al.                       | NR | NR             | WC                   | 2x10 <sup>-7</sup>  |                                 |
| rs1927702             | 9  | 15,976,716  |                   | Johansson et al.                 | G  | 0.08 (kg)      | BMI                  | 6x10 <sup>-6</sup>  | Women                           |
| rs10968576            | 9  | 28,404,339  | <i>LRRN6C</i>     | Speliotes et al.                 | G  | 0.11           | BMI                  | 3x10 <sup>-13</sup> |                                 |
| rs10458787            | 10 | 4,645,565   |                   | Liu et al.                       | G  | 0.09 (% SD)    | BMI                  | 1x10 <sup>-6</sup>  |                                 |
| rs7081678             | 10 | 32,030,629  | <i>ZEB1</i>       | Heid et al.                      | A  | 0.027          | WHR                  | 6x10 <sup>-6</sup>  |                                 |
| rs7932813             | 11 | 7,664,857   | <i>OVCH2</i>      | Heard-Costa et al.               | NR | NR             | WC                   | 5x10 <sup>-6</sup>  |                                 |
| rs10769908            | 11 | 8,440,665   | <i>STK33</i>      | Willer et al.                    | C  | NR             | BMI                  | 1x10 <sup>-6</sup>  |                                 |
| rs4929949             | 11 | 8,561,169   | <i>RPL27A</i>     | Speliotes et al.                 | C  | 0.06           | BMI                  | 3x10 <sup>-9</sup>  |                                 |
| rs7481311             | 11 | 27,539,705  | <i>BDNF</i>       | Thorleifson et al.               | T  | 3.15 (% SD)    | BMI, weight          | 8x10 <sup>-6</sup>  | BMI                             |
| rs4923461             | 11 | 27,613,486  | <i>BDNF</i>       | NR                               | NR | NR             | BMI                  | NR                  |                                 |
| rs925946              | 11 | 27,623,778  | <i>BDNF</i>       | Thorleifson et al.               | T  | 3.85 (% SD)    | BMI, weight          | 9x10 <sup>-10</sup> |                                 |
| rs6265                | 11 | 27,636,492  | <i>BDNF</i>       | Thorleifson et al.               | G  | 4.58 (% SD)    | BMI, weight          | 5x10 <sup>-10</sup> | BMI                             |
| rs10767664            | 11 | 27,682,562  | <i>BDNF</i>       | Speliotes et al.                 | A  | 0.19           | BMI                  | 5x10 <sup>-26</sup> |                                 |
| rs3817334             | 11 | 47,607,569  | <i>MTCH2</i>      | Speliotes et al.                 | T  | 0.06           | BMI                  | 2x10 <sup>-12</sup> |                                 |
| rs10838738            | 11 | 47,619,625  | <i>MTCH2</i>      | Willer et al.                    | G  | 0.07           | BMI                  | 5x10 <sup>-9</sup>  |                                 |
| rs1458095             | 11 | 80,663,196  |                   | Johansson et al.                 | G  | 0.19 (kg)      | BMI                  | 7x10 <sup>-6</sup>  | Women                           |
| rs718314              | 12 | 26,344,550  | <i>ITPR2-SSPN</i> | Heid et al.                      | G  | 0.030          | WHR                  | 2x10 <sup>-17</sup> | Women                           |

|            |    |            |                      |                                     |    |               |                      |                      |                              |
|------------|----|------------|----------------------|-------------------------------------|----|---------------|----------------------|----------------------|------------------------------|
| rs7138803  | 12 | 48,533,735 | <i>FAIM2</i>         | Thorliefson et al./Speliotes et al. | A  | 0.12          | WC/BMI               | $2 \times 10^{-12}$  | BMI from Speliotes et al.    |
| rs1443512  | 12 | 52,628,951 | <i>HOXC13</i>        | Heid et al.                         | A  | 0.031         | WHR                  | $6 \times 10^{-16}$  | Women                        |
| rs4771122  | 13 | 26,918,180 | <i>MTIF3</i>         | Speliotes et al.                    | G  | 0.09          | BMI                  | $9 \times 10^{-10}$  |                              |
| rs1333026  | 13 | 65,018,785 |                      | Fox et al.                          | NR | NR            | BMI                  | $8 \times 10^{-6}$   |                              |
| rs11847697 | 14 | 29,584,863 | <i>PRKD1</i>         | Speliotes et al.                    | T  | 0.17          | BMI                  | $6 \times 10^{-11}$  |                              |
| rs10150332 | 14 | 79,006,717 | <i>NRXN3</i>         | Speliotes et al.                    | C  | 0.13          | BMI                  | $3 \times 10^{-11}$  |                              |
| rs10146997 | 14 | 79,014,915 | <i>NRXN3</i>         | Heard-Costa et al.                  | G  | 0.65          | WC <sup>c</sup>      | $5 \times 10^{-8}$   |                              |
| rs2241423  | 15 | 65,873,892 | <i>MAP2K5</i>        | Speliotes et al.                    | G  | 0.13          | BMI                  | $1 \times 10^{-18}$  |                              |
| rs12324805 | 15 | 80,139,255 | <i>RKHD3</i>         | Willer et al.                       | C  | NR            | BMI                  | $7 \times 10^{-6}$   |                              |
| rs12444979 | 16 | 19,841,101 | <i>GPRC5B</i>        | Speliotes et al.                    | C  | 0.17          | BMI                  | $3 \times 10^{-21}$  |                              |
| rs7498665  | 16 | 28,790,742 | <i>SH2B1, ATP2A1</i> | Willer et al./Thorliefson et al.    | G  | 3.63 (% SD)   | BMI/BMI, weight      | $3 \times 10^{-10}$  | BMI from Thorliefs on et al. |
| rs7359397  | 16 | 28,793,160 | <i>SH2B1</i>         | Speliotes et al.                    | T  | 0.15          | BMI                  | $2 \times 10^{-20}$  |                              |
| rs6499640  | 16 | 52,327,178 | <i>FTO</i>           | Thorleifson et al.                  | A  | 5.25 (% SD)   | BMI, weight          | $4 \times 10^{-13}$  | BMI                          |
| rs1558902  | 16 | 52,361,075 | <i>FTO</i>           | Heard-Costa et al./Speliotes et al. | A  | 0.39          | WC <sup>c</sup> /BMI | $5 \times 10^{-120}$ | BMI from Speliotes et al.    |
| rs1121980  | 16 | 52,366,748 | <i>FTO</i>           | Loos et al.                         | ?  | 0.06 (ln BMI) | BMI                  | $4 \times 10^{-8}$   |                              |
| rs8050136  | 16 | 52,373,776 | <i>FTO</i>           | Thorleifson et al.                  | A  | 8.04 (% SD)   | BMI, weight          | $1 \times 10^{-47}$  | BMI                          |
| rs9939609  | 16 | 52,378,028 | <i>FTO</i>           | Frayling et al./Willer et al.       | A  | 0.33          | BMI                  | $4 \times 10^{-51}$  | BMI from Willer et al.       |
| rs571312   | 18 | 55,990,749 | <i>MC4R</i>          | Speliotes et al.                    | A  | 0.23          | BMI                  | $6 \times 10^{-42}$  |                              |
| rs17782313 | 18 | 56,002,077 | <i>MC4R</i>          | Loos et al./Willer et al.           | C  | 0.2           | BMI                  | $5 \times 10^{-18}$  |                              |
| rs489693   | 18 | 56,033,767 | <i>MC4R</i>          | Heard-Costa et al.                  | NR | NR            | WC                   | $4 \times 10^{-7}$   |                              |
| rs12970134 | 18 | 56,035,730 | <i>MC4R</i>          | Chambers et al./Thorliefson et al.  | A  | 4.38 (% SD)   | WC/BMI, weight       | $1 \times 10^{-12}$  | BMI from Thorliefs on et al. |
| rs3803915  | 19 | 2,111,529  |                      | Johansson et al.                    | C  | 0.13 (kg)     | BMI                  | $5 \times 10^{-6}$   |                              |
| rs29941    | 19 | 39,001,372 | <i>KCTD15</i>        | Thorleifson et al./Speliotes et al. | G  | 0.06          | BMI/BMI, weight      | $3 \times 10^{-9}$   | BMI from Speliotes et al.    |
| rs11084753 | 19 | 39,013,977 | <i>KCTD15</i>        | Willer et al.                       | G  | NR            | BMI                  | $2 \times 10^{-8}$   |                              |
| rs2287019  | 19 | 50,894,012 | <i>QPCTL</i>         | Speliotes et al.                    | C  | 0.15          | BMI                  | $2 \times 10^{-16}$  |                              |
| rs3810291  | 19 | 52,260,843 | <i>TMEM160</i>       | Speliotes et al.                    | A  | 0.09          | BMI                  | $2 \times 10^{-12}$  |                              |
| rs1878047  | 19 | 56,465,614 |                      | Johansson et al.                    | G  | -0.06 (kg)    | BMI                  | $5 \times 10^{-6}$   |                              |
| rs2145270  | 20 | 6,569,685  | <i>BMP2</i>          | Willer et al.                       | T  | NR            | BMI                  | $6 \times 10^{-6}$   |                              |
| rs4823006  | 22 | 27,781,671 | <i>ZNRF3-KREMEN1</i> | Heid et al.                         | A  | 0.023         | WHR                  | $3 \times 10^{-11}$  | Women                        |

Abbreviations: BMI, body mass index; kg, kilograms; ln, Natural Logarithm, NR, None reported; SD, Standard deviation; WC, waist circumference; WHR, waist-hip ratio

<sup>a</sup>Positions from Build 36.

<sup>b</sup>Unless otherwise noted effect sizes are in unitless changes in WHR, cm changes in WC, and kg/m<sup>2</sup> changes in BMI.

<sup>c</sup>Central adiposity measures (WC or WHR) were unadjusted for BMI and/or not found to be independent of BMI in secondary analyses.

<sup>d</sup>Previously reported SNP, rs7826222, has merged into rs545854.

**Web Table 3.** SNPs Previously Reported to Associate With Waist Circumference or BMI and Age at Menarche from Elks *et al.*, 2010

| SNP ID                                      | Chromosome: | Position <sup>a</sup> (bp) | Nearest Genes                                            | Studies | N      | Alleles |       | Coded Frequency | Fixed Effects   |           |        |         | Heterogeneity P value       |      |
|---------------------------------------------|-------------|----------------------------|----------------------------------------------------------|---------|--------|---------|-------|-----------------|-----------------|-----------|--------|---------|-----------------------------|------|
|                                             |             |                            |                                                          |         |        | Coded   | Other |                 | Estimate (days) | SE (days) | 95% CI | P value |                             |      |
| <b>Waist Circumference (WC)<sup>b</sup></b> |             |                            |                                                          |         |        |         |       |                 |                 |           |        |         |                             |      |
| rs987237                                    | 6           | 50,911,009                 | <i>TFAP2B</i>                                            | 38      | 92,104 | A       | G     | 0.82            | 13.2            | 3.2       | 7.0    | 19.4    | <b>3.3x10<sup>-5</sup></b>  | 0.95 |
| rs545854 <sup>c</sup>                       | 8           | 9,897,490                  | <i>MSRA</i>                                              | 9       | 32,335 | C       | G     | 0.81            | 16.2            | 5.8       | 4.8    | 27.6    | 5.2x10 <sup>-3</sup>        | 0.23 |
| <b>Body Mass Index (BMI)<sup>d</sup></b>    |             |                            |                                                          |         |        |         |       |                 |                 |           |        |         |                             |      |
| rs2815752                                   | 1           | 72,585,028                 | <i>NEGR1</i>                                             | 38      | 92,081 | A       | G     | 0.61            | -13.4           | 2.4       | -18.2  | -8.6    | <b>3.5x10<sup>-8</sup></b>  | 0.41 |
| rs10913469                                  | 1           | 176,180,142                | <i>SEC16B,</i><br><i>RASAL2<sup>e</sup></i>              | 37      | 88,557 | T       | C     | 0.81            | 16.7            | 3.1       | 10.6   | 22.8    | <b>8.5x10<sup>-8</sup></b>  | 0.81 |
| rs6548238                                   | 2           | 624,905                    | <i>TMEM18<sup>e</sup></i>                                | 37      | 89,688 | T       | C     | 0.16            | 19.1            | 3.4       | 12.4   | 25.7    | <b>2.1x10<sup>-8</sup></b>  | 0.40 |
| rs7647305                                   | 3           | 187,316,984                | <i>SFS10,</i><br><i>ETV5,</i><br><i>DGKG<sup>e</sup></i> | 38      | 92,064 | T       | C     | 0.21            | 8.7             | 3.0       | 2.9    | 14.5    | 3.3x10 <sup>-3</sup>        | 0.62 |
| rs10938397                                  | 4           | 44,877,284                 | <i>GNPDA2</i>                                            | 37      | 88,074 | A       | G     | 0.57            | 13.5            | 2.6       | 8.4    | 18.6    | <b>1.7x10<sup>-7</sup></b>  | 0.93 |
| rs4923461                                   | 11          | 27,613,486                 | <i>BDNF</i>                                              | 33      | 89,535 | A       | G     | 0.80            | -13.0           | 3.1       | -19.0  | -7.0    | <b>2.3x10<sup>-5</sup></b>  | 0.44 |
| rs7138803                                   | 12          | 48,533,735                 | <i>FAIM2</i>                                             | 37      | 89,837 | A       | G     | 0.38            | -11.7           | 2.5       | -16.6  | -6.9    | <b>2.2x10<sup>-6</sup></b>  | 0.29 |
| rs9939609                                   | 16          | 52,378,028                 | <i>FTO<sup>e</sup></i>                                   | 37      | 89,904 | A       | T     | 0.40            | -16.9           | 2.4       | -21.7  | -12.2   | <b>4.2x10<sup>-12</sup></b> | 0.22 |
| rs11084753                                  | 19          | 39,013,977                 | <i>KCTD15</i>                                            | 36      | 86,300 | A       | G     | 0.34            | 10.8            | 2.8       | 5.4    | 16.3    | <b>1.0x10<sup>-4</sup></b>  | 0.60 |

Abbreviations: CI, Confidence interval; SE, Standard error; SNP ID, Reference Single Nucleotide Polymorphism Identification Number

P values in bold represent SNP-associations below the Bonferroni threshold of  $P < 0.05/95$ .

<sup>a</sup>Positions from Build 36.

<sup>b</sup>Unadjusted for BMI.

<sup>c</sup>Previously SNP ID, rs7826222, has changed into rs545854.

<sup>d</sup>This table is an updated version of Supplemental Table 13 from Elks *et al.*, 2010. Therefore the SNPs in this table represent loci (*NEGR1*, *SEC16B*, *TMEM18*, *ETV5*, *BDNF*, *FTO*, and *KCTD15*) that are also described in Table 1 (i.e. represented by SNPs that were not previously been associated with both adiposity and menarche). Additional SNP-associations at three of these loci (*TMEM18*, *BDNF*, and *FTO*) are reported in Web Table 5, because they were in linkage disequilibrium with four SNPs in Table 1 ( $r^2 \geq 0.2$ ) and had not been described previously.

<sup>e</sup>SNPs at *SEC16B*, *TMEM18*, *ETV5*, and *FTO* are also previously reported to genome-wide significantly associate with age at menarche ( $P < 5 \times 10^{-8}$ ): rs633715, rs2947411, rs2002675, and rs9939609 (presented above), respectively.

**Web Table 4.** SNPs Previously Reported to Associate With Waist Circumference, Waist-Hip Ratio, or BMI but not With Age at Menarche That Did Not Reach Statistical Significance ( $P \geq 0.05/95$ )

| SNP ID                                      | Chromosome:<br>Position <sup>a</sup> (bp) | Nearest Genes | Studies                    | N  | Alleles |       |                 | Fixed Effects   |           |        |         | Heterogeneity<br>P value |        |       |
|---------------------------------------------|-------------------------------------------|---------------|----------------------------|----|---------|-------|-----------------|-----------------|-----------|--------|---------|--------------------------|--------|-------|
|                                             |                                           |               |                            |    | Coded   | Other | Coded Frequency | Estimate (days) | SE (days) | 95% CI | P value |                          |        |       |
| <b>Waist Circumference (WC)<sup>b</sup></b> |                                           |               |                            |    |         |       |                 |                 |           |        |         |                          |        |       |
| rs6429082 <sup>c</sup>                      | 1                                         | 233,666,752   | <i>TBCE</i>                | 33 | 89,452  | T     | C               | 0.46            | 7.2       | 2.4    | 2.4     | 11.9                     | 0.0031 | 0.59  |
| rs1875517                                   | 3                                         | 118,790,257   |                            | 38 | 92,080  | A     | G               | 0.43            | -2.1      | 2.4    | -6.8    | 2.6                      | 0.38   | 0.86  |
| rs4701252                                   | 5                                         | 21,814,911    | <i>CDH12</i>               | 31 | 57,845  | T     | C               | 0.83            | 9.1       | 5.0    | -0.6    | 18.8                     | 0.068  | 0.69  |
| rs1555967                                   | 6                                         | 51,267,954    | <i>PKHD1</i>               | 37 | 89,957  | A     | G               | 0.24            | 1.9       | 3.1    | -4.2    | 8.1                      | 0.53   | 0.04  |
| rs4471028                                   | 8                                         | 75,457,530    | <i>GDAP1</i>               | 38 | 92,091  | T     | G               | 0.57            | 0.0       | 2.4    | -4.7    | 4.7                      | 0.99   | 0.43  |
| rs7932813                                   | 11                                        | 7,664,857     | <i>OVCH2</i>               | 38 | 91,927  | A     | G               | 0.83            | -3.3      | 3.4    | -10.0   | 3.5                      | 0.34   | 0.11  |
| rs489693                                    | 18                                        | 56,033,767    | <i>MC4R</i>                | 38 | 92,092  | A     | C               | 0.32            | 1.2       | 2.6    | -3.8    | 6.3                      | 0.63   | 0.70  |
| <b>Waist-Hip Ratio (WHR)<sup>b</sup></b>    |                                           |               |                            |    |         |       |                 |                 |           |        |         |                          |        |       |
| rs984222                                    | 1                                         | 119,305,366   | <i>TBX15-WARS2</i>         | 33 | 89,547  | C     | G               | 0.38            | -0.1      | 2.5    | 0.0     | 0.0                      | 0.97   | 0.50  |
| rs1011731                                   | 1                                         | 170,613,171   | <i>DNM3-PIGC</i>           | 32 | 87,317  | A     | G               | 0.57            | -0.5      | 2.4    | -5.3    | 4.3                      | 0.85   | 0.51  |
| rs2605100 <sup>c</sup>                      | 1                                         | 217,710,847   | <i>LYPLAL1<sup>d</sup></i> | 32 | 87,350  | A     | G               | 0.31            | 1.4       | 2.6    | -3.7    | 6.6                      | 0.59   | 0.78  |
| rs10195252                                  | 2                                         | 165,221,337   | <i>GRB14</i>               | 32 | 85,913  | T     | C               | 0.57            | -0.3      | 2.5    | -5.1    | 4.6                      | 0.92   | 0.30  |
| rs6784615                                   | 3                                         | 52,481,466    | <i>NISCH-STAB1</i>         | 32 | 87,341  | T     | C               | 0.95            | 1.1       | 5.9    | -10.5   | 12.7                     | 0.86   | 0.07  |
| rs6795735                                   | 3                                         | 64,680,405    | <i>ADAMTS9</i>             | 32 | 87,365  | T     | C               | 0.41            | 2.3       | 2.4    | -2.5    | 7.1                      | 0.36   | 0.24  |
| rs6861681                                   | 5                                         | 173,295,064   | <i>CPEB4</i>               | 32 | 87,311  | A     | G               | 0.32            | 4.4       | 2.8    | -1.1    | 9.9                      | 0.12   | 0.79  |
| rs1294421                                   | 6                                         | 6,688,148     | <i>LY86</i>                | 32 | 87,100  | T     | G               | 0.38            | 1.4       | 2.5    | -3.6    | 6.3                      | 0.58   | 0.64  |
| rs2076529                                   | 6                                         | 32,471,933    | <i>BTNL2</i>               | 23 | 55,048  | T     | C               | 0.58            | -0.4      | 3.0    | -6.2    | 5.4                      | 0.88   | <0.01 |
| rs6905288                                   | 6                                         | 43,866,851    | <i>VEGFA</i>               | 30 | 79,680  | A     | G               | 0.56            | -2.2      | 3.1    | -8.3    | 4.0                      | 0.48   | 0.52  |
| rs9491696                                   | 6                                         | 127,494,332   | <i>RSPO3</i>               | 33 | 89,202  | C     | G               | 0.50            | 1.2       | 2.4    | -3.6    | 6.0                      | 0.63   | 0.54  |
| rs1055144                                   | 7                                         | 25,837,634    | <i>NFE2L3</i>              | 32 | 87,391  | T     | C               | 0.19            | -1.1      | 3.2    | -7.4    | 5.1                      | 0.72   | <0.01 |
| rs7081678                                   | 10                                        | 32,030,629    | <i>ZEB1</i>                | 32 | 88,994  | A     | G               | 0.08            | 7.2       | 4.8    | -2.3    | 16.6                     | 0.14   | 0.20  |
| rs718314                                    | 12                                        | 26,344,550    | <i>ITPR2-SSPN</i>          | 33 | 89,460  | A     | G               | 0.75            | -4.3      | 2.9    | -10.1   | 1.4                      | 0.14   | 0.52  |
| rs1443512                                   | 12                                        | 52,628,951    | <i>HOXC13</i>              | 33 | 89,530  | A     | C               | 0.22            | -2.0      | 2.9    | -7.7    | 3.8                      | 0.50   | 0.07  |
| rs4823006                                   | 22                                        | 27,781,671    | <i>ZNRF3-KREMEN1</i>       | 32 | 86,963  | A     | G               | 0.57            | -0.7      | 2.5    | -5.6    | 4.2                      | 0.78   | 0.47  |
| <b>Body Mass Index (BMI)</b>                |                                           |               |                            |    |         |       |                 |                 |           |        |         |                          |        |       |
| rs3934834                                   | 1                                         | 995,669       |                            | 32 | 81,506  | T     | C               | 0.16            | -0.9      | 3.8    | -8.4    | 6.5                      | 0.81   | 0.77  |
| rs10783050                                  | 1                                         | 96,809,671    | <sup>d</sup>               | 37 | 88,558  | T     | C               | 0.64            | 2.3       | 2.5    | -2.6    | 7.2                      | 0.36   | 0.99  |
| rs2890652                                   | 2                                         | 142,676,401   | <i>LRP1B</i>               | 38 | 91,847  | T     | C               | 0.82            | 2.9       | 3.3    | -3.6    | 9.3                      | 0.38   | 0.20  |
| rs824931                                    | 2                                         | 222,509,943   |                            | 38 | 92,048  | T     | C               | 0.65            | 5.9       | 2.5    | 0.9     | 10.8                     | 0.020  | 0.03  |
| rs1024889                                   | 3                                         | 70,546,020    |                            | 37 | 89,908  | A     | G               | 0.68            | -6.0      | 2.6    | -11.1   | -0.9                     | 0.020  | 0.04  |

|            |    |             |                                  |    |        |   |   |      |       |     |       |      |        |      |
|------------|----|-------------|----------------------------------|----|--------|---|---|------|-------|-----|-------|------|--------|------|
| rs13078807 | 3  | 85,966,840  | <i>CADM2</i>                     | 37 | 88,567 | A | G | 0.79 | 1.8   | 3.1 | -4.2  | 7.8  | 0.56   | 0.76 |
| rs1152846  | 3  | 189,903,591 |                                  | 38 | 92,091 | T | C | 0.24 | -0.1  | 2.8 | 0.0   | 0.0  | 0.96   | 0.88 |
| rs13107325 | 4  | 103,407,732 | <i>SLC39A8</i>                   | 37 | 88,562 | T | C | 0.07 | -11.7 | 5.7 | -22.9 | -0.6 | 0.04   | 0.19 |
| rs2383393  | 4  | 180,901,647 |                                  | 38 | 91,997 | A | G | 0.40 | -1.1  | 2.5 | -6.0  | 3.9  | 0.67   | 0.87 |
| rs2112347  | 5  | 75,050,998  | <i>FLJ35779</i>                  | 38 | 92,039 | T | G | 0.64 | -2.2  | 2.5 | -7.1  | 2.7  | 0.39   | 0.90 |
| rs4836133  | 5  | 124,360,002 | <i>ZNF608</i>                    | 37 | 90,040 | A | C | 0.48 | 2.2   | 2.6 | -2.9  | 7.2  | 0.40   | 0.22 |
| rs12517906 | 5  | 180,103,425 | <i>MGAT1</i>                     | 36 | 86,375 | T | C | 0.15 | -0.7  | 3.5 | -7.5  | 6.1  | 0.84   | 0.91 |
| rs206936   | 6  | 34,410,847  | <i>NUDT3</i>                     | 38 | 92,037 | A | G | 0.80 | -6.1  | 3.0 | -12.0 | -0.2 | 0.043  | 0.88 |
| rs2275215  | 6  | 129,903,085 | <i>LAMA2</i>                     | 37 | 89,922 | T | C | 0.73 | -2.7  | 2.7 | -8.1  | 2.7  | 0.32   | 0.27 |
| rs1106683  | 7  | 131,104,065 | <sup>d</sup>                     | 37 | 89,904 | A | G | 0.15 | -6.2  | 3.5 | -13.0 | 0.7  | 0.077  | 0.56 |
| rs1927702  | 9  | 15,976,716  |                                  | 38 | 91,935 | T | C | 0.57 | 2.5   | 2.4 | -2.2  | 7.2  | 0.30   | 0.55 |
| rs10968576 | 9  | 28,404,339  | <i>LRRN6C</i>                    | 37 | 88,578 | A | G | 0.68 | 0.7   | 2.7 | -4.6  | 5.9  | 0.81   | 0.98 |
| rs10458787 | 10 | 4,645,565   |                                  | 37 | 87,781 | A | G | 0.23 | -1.7  | 3.1 | -7.8  | 4.5  | 0.59   | 0.25 |
| rs10838738 | 11 | 47,619,625  | <i>MTCH2<sup>d</sup></i>         | 37 | 88,560 | A | G | 0.65 | 4.5   | 2.5 | -0.5  | 9.4  | 0.079  | 0.25 |
| rs1458095  | 11 | 80,663,196  |                                  | 38 | 92,072 | T | C | 0.09 | -9.0  | 4.3 | -17.5 | -0.5 | 0.038  | 0.74 |
| rs4771122  | 13 | 26,918,180  | <i>MTIF3</i>                     | 38 | 91,603 | A | G | 0.77 | 7.5   | 3.0 | 1.6   | 13.4 | 0.012  | 0.05 |
| rs1333026  | 13 | 65,018,785  |                                  | 38 | 92,085 | A | G | 0.16 | 3.4   | 3.4 | -3.3  | 10.1 | 0.32   | 0.34 |
| rs11847697 | 14 | 29,584,863  | <i>PRKD1</i>                     | 37 | 88,518 | T | C | 0.04 | -17.9 | 6.6 | -30.8 | -5.0 | 0.0063 | 0.69 |
| rs10150332 | 14 | 79,006,717  | <i>NRXN3<sup>d</sup></i>         | 37 | 88,565 | T | C | 0.78 | 6.0   | 3.0 | 0.0   | 11.9 | 0.047  | 0.01 |
| rs12324805 | 15 | 80,139,255  | <i>RKHD3</i>                     | 36 | 86,322 | A | C | 0.67 | -5.1  | 2.6 | -10.2 | 0.1  | 0.053  | 0.02 |
| rs7498665  | 16 | 28,790,742  | <i>SH2B1, ATP2A1<sup>d</sup></i> | 38 | 91,853 | A | G | 0.60 | 2.1   | 2.4 | -2.7  | 6.9  | 0.39   | 0.88 |
| rs12970134 | 18 | 56,035,730  | <i>MC4R<sup>d</sup></i>          | 37 | 88,573 | A | G | 0.27 | 1.1   | 2.8 | -4.3  | 6.6  | 0.69   | 0.70 |
| rs3803915  | 19 | 2,111,529   |                                  | 36 | 90,328 | A | C | 0.11 | 8.7   | 4.1 | 0.7   | 16.7 | 0.033  | 0.65 |
| rs2287019  | 19 | 50,894,012  | <i>QPCTL</i>                     | 36 | 89,334 | T | C | 0.20 | 4.0   | 3.3 | -2.4  | 10.4 | 0.22   | 0.36 |
| rs3810291  | 19 | 52,260,843  | <i>TMEM160</i>                   | 36 | 86,923 | A | G | 0.66 | -8.9  | 2.8 | -14.5 | -3.4 | 0.0016 | 0.42 |
| rs1878047  | 19 | 56,465,614  |                                  | 38 | 92,085 | A | G | 0.63 | -1.6  | 2.5 | -6.5  | 3.2  | 0.51   | 0.22 |
| rs2145270  | 20 | 6,569,685   | <i>BMP2</i>                      | 38 | 91,838 | T | C | 0.63 | 2.8   | 2.6 | -2.2  | 7.9  | 0.27   | 0.29 |

Abbreviations: CI, Confidence interval; SE, Standard error; SNP ID, Reference Single Nucleotide Polymorphism Identification Number

<sup>a</sup>Positions from Build 36.

<sup>b</sup>Adjusted for BMI, unless otherwise noted.

<sup>c</sup>Unadjusted for BMI.

<sup>d</sup>Additional SNP-associations at *LYPLAL1*, *PTBP2*, intergenic region on chromosome 7, *MTCH2*, *NRXN3*, *SH2B1*, and *MC4R* are reported in Web Table 5, because they were in linkage disequilibrium with the noted SNPs ( $r^2 \geq 0.2$ ).

**Web Table 5.** SNPs Previously Reported to Associate With Waist-Hip Ratio or BMI but not With Age at Menarche that are Within 500kb and in Linkage Disequilibrium<sup>a</sup> ( $r^2 \geq 0.2$ ) With Other Candidate SNPs

| SNP ID                                   | Chromosome:<br>Position <sup>b</sup> (bp) | Nearest<br>Genes | LD <sup>a</sup> |            | Studies | N  | Alleles    |            |                         | Fixed Effects           |              |        |         | Hetero-<br>geneity<br>P value |                                         |      |
|------------------------------------------|-------------------------------------------|------------------|-----------------|------------|---------|----|------------|------------|-------------------------|-------------------------|--------------|--------|---------|-------------------------------|-----------------------------------------|------|
|                                          |                                           |                  | SNP ID          | $r^2$      |         |    | Cod-<br>ed | Oth-<br>er | Coded<br>Freq-<br>uency | Esti-<br>mate<br>(days) | SE<br>(days) | 95% CI | P value |                               |                                         |      |
| <b>Waist-Hip Ratio (WHR)<sup>c</sup></b> |                                           |                  |                 |            |         |    |            |            |                         |                         |              |        |         |                               |                                         |      |
| rs4846567                                | 1                                         | 217,817,340      | <i>LYPLAL1</i>  | rs2605100  | 0.64    | 33 | 89,518     | T          | G                       | 0.30                    | -1.3         | 2.7    | -6.5    | 3.9                           | $6.3 \times 10^{-1}$                    | 0.56 |
| <b>Body Mass Index (BMI)</b>             |                                           |                  |                 |            |         |    |            |            |                         |                         |              |        |         |                               |                                         |      |
| rs1555543                                | 1                                         | 96,717,385       | <i>PTBP2</i>    | rs10783050 | 0.37    | 37 | 89,908     | A          | C                       | 0.41                    | -3.4         | 2.4    | -8.2    | 1.4                           | $1.6 \times 10^{-1}$                    | 0.52 |
| rs2867125                                | 2                                         | 612,827          | <i>TMEM18</i>   | rs7561317  | 1.00    | 38 | 92,075     | T          | C                       | 0.17                    | 19.3         | 3.2    | 13.0    | 25.6                          | <b><math>1.6 \times 10^{-9}</math></b>  | 0.56 |
| rs1106684                                | 7                                         | 131,104,205      |                 | rs1106683  | 0.88    | 37 | 89,625     | C          | G                       | 0.85                    | 6.1          | 3.6    | -1.0    | 13.2                          | $9.0 \times 10^{-2}$                    | 0.54 |
| rs4929949                                | 11                                        | 8,561,169        | <i>RPL27A</i>   | rs10769908 | 0.97    | 38 | 91,649     | T          | C                       | 0.47                    | 10.1         | 2.4    | 5.3     | 14.9                          | <b><math>4.1 \times 10^{-5}</math></b>  | 0.98 |
| rs925946                                 | 11                                        | 27,623,778       | <i>BDNF</i>     | rs7481311  | 0.57    | 38 | 92,073     | T          | G                       | 0.31                    | -11.8        | 2.6    | -16.8   | -6.7                          | <b><math>5.9 \times 10^{-6}</math></b>  | 0.92 |
| rs10767664                               | 11                                        | 27,682,562       | <i>BDNF</i>     | rs6265     | 0.77    | 37 | 88,544     | A          | T                       | 0.79                    | -14.2        | 3.1    | -20.2   | -8.2                          | <b><math>3.6 \times 10^{-6}</math></b>  | 0.30 |
| rs3817334                                | 11                                        | 47,607,569       | <i>MTCH2</i>    | rs10838738 | 0.84    | 37 | 89,931     | T          | C                       | 0.41                    | -4.2         | 2.4    | -9.0    | 0.6                           | $8.4 \times 10^{-2}$                    | 0.33 |
| rs10146997 <sup>d</sup>                  | 14                                        | 79,014,915       | <i>NRXN3</i>    | rs10150332 | 1.00    | 37 | 88,573     | A          | G                       | 0.79                    | 6.2          | 3.0    | 0.2     | 12.1                          | $4.2 \times 10^{-2}$                    | 0.01 |
| rs7359397                                | 16                                        | 28,793,160       | <i>SH2B1</i>    | rs7498665  | 1.00    | 38 | 92,105     | T          | C                       | 0.40                    | -2.4         | 2.4    | -7.2    | 2.3                           | $3.2 \times 10^{-2}$                    | 0.87 |
| rs6499640 <sup>e</sup>                   | 16                                        | 52,327,178       | <i>FTO</i>      | rs8050136  | 0.21    | 37 | 89,848     | A          | G                       | 0.62                    | -5.5         | 2.5    | -10.4   | -0.5                          | $2.9 \times 10^{-2}$                    | 0.44 |
| rs1558902 <sup>e</sup>                   | 16                                        | 52,361,075       | <i>FTO</i>      | rs8050136  | 0.93    | 38 | 92,014     | A          | T                       | 0.41                    | -17.5        | 2.6    | -22.5   | -12.5                         | <b><math>6.2 \times 10^{-12}</math></b> | 0.42 |
| rs1121980 <sup>e</sup>                   | 16                                        | 52,366,748       | <i>FTO</i>      | rs8050136  | 0.84    | 37 | 89,612     | A          | G                       | 0.43                    | -17.2        | 2.6    | -22.2   | -12.2                         | <b><math>2.6 \times 10^{-11}</math></b> | 0.22 |
| rs571312 <sup>e</sup>                    | 18                                        | 55,990,749       | <i>MC4R</i>     | rs12970134 | 0.81    | 38 | 92,026     | A          | C                       | 0.24                    | 5.4          | 2.9    | -0.3    | 11.0                          | $6.4 \times 10^{-2}$                    | 0.94 |
| rs17782313 <sup>e</sup>                  | 18                                        | 56,002,077       | <i>MC4R</i>     | rs12970134 | 0.81    | 36 | 86,337     | T          | C                       | 0.76                    | -5.1         | 3.0    | -10.9   | 0.7                           | $8.3 \times 10^{-2}$                    | 0.90 |

Abbreviations: CI, Confidence interval; LD, Linkage disequilibrium; SE, Standard error; SNP ID, Reference Single Nucleotide Polymorphism Identification Number

P values in bold represent SNP-associations below the Bonferroni threshold of  $P < 0.05/95$ .

<sup>a</sup>LD data from HapMap Build 22 data.

<sup>c</sup>Adjusted for BMI.

<sup>d</sup>Previously associated with waist circumference, but the signal went away after adjustment for BMI.

<sup>e</sup>In LD with each other: *FTO* ( $r^2 > 0.21$ ) and *MC4R* ( $r^2 = 1.00$ ).



**Web Table 6. Study-Specific Estimates for BMI-Age at Menarche-SNPs at Six Novel Loci by Decreasing Magnitude of Effect**

| Study <sup>a</sup> by locus  | Effect per    |           |              |              |
|------------------------------|---------------|-----------|--------------|--------------|
|                              | allele (days) | SE (days) | Lower 95% CI | Upper 95% CI |
| <b>GPRC5B (rs12444979-T)</b> |               |           |              |              |
| AGES                         | -0.5          | 25.9      | -51.3        | 50.3         |
| AMISH                        | 3.9           | 52.9      | -99.8        | 107.6        |
| ARIC                         | 12.0          | 16.6      | -20.5        | 44.6         |
| B58C-T1DGC                   | 26.5          | 32.2      | -36.7        | 89.7         |
| B58C-WTCCC                   | -27.6         | 38.7      | -103.4       | 48.2         |
| COLAUS                       | 17.5          | 23.2      | -28.1        | 63.1         |
| DECODE                       | 33.1          | 8.5       | 16.4         | 49.8         |
| DNBC                         | 13.1          | 24.5      | -34.8        | 61.1         |
| EGCUT                        | 60.7          | 38.7      | -15.2        | 136.6        |
| EPIC                         | -23.7         | 40.1      | -102.2       | 54.8         |
| ERF                          | 62.3          | 50.2      | -36.0        | 160.6        |
| FHS                          | 20.9          | 18.4      | -15.2        | 57.0         |
| GENMETS                      | 78.0          | 46.2      | -12.5        | 168.5        |
| HBCS                         | 49.7          | 37.9      | -24.7        | 124.0        |
| INCHIANTI                    | -85.2         | 47.7      | -178.7       | 8.2          |
| INDIANA                      | 17.5          | 27.0      | -35.4        | 70.5         |
| INGI-VB                      | -43.3         | 37.6      | -116.9       | 30.4         |
| KORA F3                      | -14.1         | 39.9      | -92.2        | 64.1         |
| KORA S4                      | 8.2           | 36.1      | -62.6        | 79.1         |
| KORCULA                      | 55.8          | 51.7      | -45.4        | 157.1        |
| NFBC                         | -25.5         | 19.3      | -63.3        | 12.3         |
| NHS-BRCA                     | 51.3          | 21.6      | 9.0          | 93.6         |
| NHS-T2D                      | -3.0          | 18.7      | -39.8        | 33.7         |
| NTR                          | 49.0          | 34.0      | -17.7        | 115.7        |
| ORCADES                      | 93.1          | 63.7      | -31.7        | 217.9        |
| QIMR                         | -             | -         | -            | -            |
| RAINE                        | -29.3         | 32.5      | -93.0        | 34.4         |
| RS1                          | 29.2          | 21.2      | -12.3        | 70.7         |
| RS2                          | 16.1          | 35.1      | -52.7        | 84.8         |
| RS3                          | 14.6          | 35.1      | -54.1        | 83.3         |
| SAGE                         | 3.9           | 32.0      | -58.7        | 66.6         |
| SARDINIA                     | 20.5          | 31.4      | -41.1        | 82.0         |
| SPLIT                        | -45.4         | 67.1      | -176.9       | 86.1         |
| TWINSUK1                     | 7.7           | 18.6      | -28.7        | 44.1         |
| TWINSUK2                     | 19.6          | 46.8      | -72.2        | 111.4        |

|                             |        |      |        |       |
|-----------------------------|--------|------|--------|-------|
| TWINSUK3                    | 47.7   | 37.9 | -26.7  | 122.1 |
| VIS                         | -111.7 | 54.9 | -219.4 | -4.0  |
| WGHS                        | 3.7    | 7.3  | -10.7  | 18.0  |
| <b>MAP2K5 (rs2241423-A)</b> |        |      |        |       |
| AGES                        | 38.9   | 19.3 | 1.1    | 76.7  |
| AMISH                       | -31.0  | 44.8 | -118.8 | 56.8  |
| ARIC                        | 19.5   | 13.6 | -7.2   | 46.1  |
| B58C-T1DGC                  | -6.4   | 26.2 | -57.7  | 45.0  |
| B58C-WTCCC                  | 46.8   | 34.4 | -20.6  | 114.2 |
| COLAUS                      | 22.0   | 18.5 | -14.3  | 58.4  |
| DECODE                      | 19.7   | 6.4  | 7.1    | 32.2  |
| DNBC                        | -14.2  | 19.4 | -52.2  | 23.7  |
| EGCUT                       | 15.1   | 35.9 | -55.3  | 85.5  |
| EPIC                        | 1.9    | 32.6 | -62.1  | 65.8  |
| ERF                         | 16.6   | 32.0 | -46.2  | 79.4  |
| FHS                         | 36.4   | 15.8 | 5.5    | 67.3  |
| GENMETS                     | 27.4   | 46.6 | -64.0  | 118.7 |
| HBCS                        | 8.6    | 30.6 | -51.4  | 68.7  |
| INCHIANTI                   | 72.3   | 35.7 | 2.2    | 142.3 |
| INDIANA                     | -0.7   | 22.3 | -44.4  | 42.9  |
| INGI-VB                     | -16.5  | 30.6 | -76.4  | 43.4  |
| KORA F3                     | -71.7  | 31.9 | -134.3 | -9.2  |
| KORA S4                     | -15.7  | 29.9 | -74.3  | 42.9  |
| KORCULA                     | -40.6  | 44.8 | -128.3 | 47.2  |
| NFBC                        | -17.1  | 17.4 | -51.2  | 17.1  |
| NHS-BRCA                    | -7.3   | 18.2 | -43.0  | 28.4  |
| NHS-T2D                     | 19.7   | 15.5 | -10.6  | 50.0  |
| NTR                         | 22.0   | 26.4 | -29.7  | 73.8  |
| ORCADES                     | 24.3   | 50.7 | -75.1  | 123.8 |
| QIMR                        | 17.5   | 16.1 | -14.0  | 49.0  |
| RAINE                       | 82.0   | 28.5 | 26.1   | 137.9 |
| RS1                         | 19.7   | 17.9 | -15.4  | 54.8  |
| RS2                         | 31.4   | 29.6 | -26.6  | 89.4  |
| RS3                         | -5.8   | 29.2 | -63.1  | 51.4  |
| SAGE                        | -7.4   | 26.0 | -58.4  | 43.6  |
| SARDINIA                    | -12.1  | 28.1 | -67.2  | 43.1  |
| SPLIT                       | -8.3   | 56.1 | -118.2 | 101.6 |
| TWINSUK1                    | 10.2   | 13.6 | -16.5  | 37.0  |
| TWINSUK2                    | 73.4   | 37.2 | 0.5    | 146.3 |

|                             |        |      |        |       |
|-----------------------------|--------|------|--------|-------|
| TWINSUK3                    | -38.7  | 30.5 | -98.4  | 21.0  |
| VIS                         | 27.9   | 44.2 | -58.8  | 114.6 |
| WGHS                        | 11.7   | 5.8  | 0.2    | 23.1  |
| <b>TNNI3K (rs1514175-A)</b> |        |      |        |       |
| AGES                        | 3.9    | 15.8 | -27.2  | 34.9  |
| AMISH                       | 16.9   | 31.6 | -45.1  | 78.8  |
| ARIC                        | -20.1  | 11.6 | -42.8  | 2.5   |
| B58C-T1DGC                  | -11.8  | 21.8 | -54.5  | 30.9  |
| B58C-WTCCC                  | -25.8  | 27.4 | -79.5  | 28.0  |
| COLAUS                      | -30.1  | 15.9 | -61.3  | 1.2   |
| DECODE                      | -4.0   | 5.2  | -14.3  | 6.2   |
| DNBC                        | -16.8  | 16.4 | -49.0  | 15.4  |
| EGCUT                       | -18.8  | 27.4 | -72.5  | 35.0  |
| EPIC                        | -21.7  | 27.0 | -74.6  | 31.3  |
| ERF                         | -0.9   | 27.2 | -54.2  | 52.5  |
| FHS                         | -13.1  | 13.2 | -39.1  | 12.8  |
| GENMETS                     | -107.1 | 32.7 | -171.2 | -42.9 |
| HBCS                        | -48.1  | 24.1 | -95.4  | -0.8  |
| INCHIANTI                   | 18.1   | 30.6 | -41.9  | 78.1  |
| INDIANA                     | -27.0  | 19.4 | -65.0  | 10.9  |
| INGI-VB                     | -31.8  | 27.0 | -84.7  | 21.0  |
| KORA F3                     | -86.9  | 26.4 | -138.7 | -35.2 |
| KORA S4                     | 47.1   | 26.4 | -4.7   | 98.9  |
| KORCULA                     | 9.8    | 39.6 | -67.8  | 87.4  |
| NFBC                        | -11.3  | 13.1 | -36.9  | 14.4  |
| NHS-BRCA                    | -19.7  | 15.3 | -49.8  | 10.3  |
| NHS-T2D                     | -20.7  | 12.9 | -46.1  | 4.6   |
| NTR                         | 0.7    | 22.7 | -43.8  | 45.1  |
| ORCADES                     | -17.6  | 39.0 | -94.0  | 58.8  |
| QIMR                        | -5.8   | 13.1 | -31.6  | 19.9  |
| RAINE                       | -49.1  | 23.6 | -95.3  | -2.8  |
| RS1                         | -9.5   | 15.3 | -39.6  | 20.6  |
| RS2                         | 26.3   | 25.2 | -23.1  | 75.7  |
| RS3                         | -72.0  | 24.8 | -120.6 | -23.3 |
| SAGE                        | -51.2  | 23.2 | -96.7  | -5.8  |
| SARDINIA                    | -      | -    | -      | -     |
| SPLIT                       | 4.2    | 51.0 | -95.8  | 104.2 |
| TWINSUK1                    | -4.8   | 8.5  | -21.4  | 11.7  |
| TWINSUK2                    | 1.3    | 32.4 | -62.3  | 64.8  |

|                         |       |      |        |       |
|-------------------------|-------|------|--------|-------|
| TWINSUK3                | 3.4   | 25.5 | -46.6  | 53.4  |
| VIS                     | -24.1 | 39.7 | -102.0 | 53.8  |
| WGHS                    | -11.7 | 5.1  | -21.7  | -1.7  |
| <b>RBJ (rs713586-T)</b> |       |      |        |       |
| AGES                    | -4.8  | 15.7 | -35.5  | 25.9  |
| AMISH                   | 50.3  | 36.5 | -21.3  | 121.8 |
| ARIC                    | 12.5  | 11.7 | -10.3  | 35.4  |
| B58C-T1DGC              | -16.6 | 21.5 | -58.7  | 25.5  |
| B58C-WTCCC              | 50.5  | 29.0 | -6.4   | 107.3 |
| COLAUS                  | 1.9   | 16.6 | -30.7  | 34.5  |
| DECODE                  | 6.2   | 5.3  | -4.1   | 16.6  |
| DNBC                    | 23.0  | 16.4 | -9.2   | 55.2  |
| EGCUT                   | 40.9  | 28.5 | -15.0  | 96.8  |
| EPIC                    | -4.2  | 30.1 | -63.2  | 54.8  |
| ERF                     | -51.5 | 26.8 | -104.1 | 1.0   |
| FHS                     | 23.0  | 13.5 | -3.3   | 49.4  |
| GENMETS                 | 28.0  | 32.5 | -35.6  | 91.7  |
| HBCS                    | 1.7   | 24.4 | -46.1  | 49.5  |
| INCHIANTI               | 16.1  | 30.4 | -43.4  | 75.6  |
| INDIANA                 | 34.3  | 19.0 | -2.9   | 71.6  |
| INGI-VB                 | 8.2   | 26.9 | -44.5  | 61.0  |
| KORA F3                 | 13.5  | 28.9 | -43.1  | 70.1  |
| KORA S4                 | -24.2 | 25.9 | -74.9  | 26.5  |
| KORCULA                 | -25.6 | 39.5 | -103.1 | 51.9  |
| NFBC                    | 1.3   | 13.4 | -25.1  | 27.6  |
| NHS-BRCA                | 33.4  | 15.0 | 3.9    | 62.9  |
| NHS-T2D                 | 14.5  | 12.9 | -10.9  | 39.9  |
| NTR                     | 1.3   | 22.2 | -42.3  | 44.9  |
| ORCADES                 | 15.6  | 40.5 | -63.8  | 95.0  |
| QIMR                    | 10.2  | 12.8 | -14.8  | 35.3  |
| RAINE                   | 20.7  | 22.7 | -23.7  | 65.2  |
| RS1                     | 2.9   | 15.0 | -26.4  | 32.3  |
| RS2                     | 37.3  | 24.8 | -11.4  | 85.9  |
| RS3                     | 30.7  | 24.5 | -17.3  | 78.6  |
| SAGE                    | -17.5 | 22.2 | -61.1  | 26.1  |
| SARDINIA                | 24.5  | 23.0 | -20.6  | 69.6  |
| SPLIT                   | 40.1  | 45.7 | -49.5  | 129.6 |
| TWINSUK1                | 17.9  | 7.3  | 3.7    | 32.2  |
| TWINSUK2                | 6.3   | 30.9 | -54.3  | 66.9  |

|                           |       |      |        |       |
|---------------------------|-------|------|--------|-------|
| TWINSUK3                  | -0.9  | 25.5 | -50.9  | 49.1  |
| VIS                       | -3.8  | 39.6 | -81.4  | 73.7  |
| WGHS                      | 14.6  | 5.1  | 4.6    | 24.6  |
| <b>FANCL (rs887912-T)</b> |       |      |        |       |
| AGES                      | 14.3  | 17.6 | -20.2  | 48.8  |
| AMISH                     | 7.8   | 31.6 | -54.1  | 69.8  |
| ARIC                      | -7.4  | 12.6 | -32.1  | 17.3  |
| B58C-T1DGC                | -38.1 | 25.1 | -87.4  | 11.1  |
| B58C-WTCCC                | 6.6   | 30.9 | -53.9  | 67.2  |
| COLAUS                    | -0.8  | 17.5 | -35.1  | 33.5  |
| DECODE                    | -16.9 | 5.9  | -28.5  | -5.3  |
| DNBC                      | 1.1   | 17.9 | -34.0  | 36.2  |
| EGCUT                     | -14.6 | 31.8 | -77.0  | 47.8  |
| EPIC                      | -41.2 | 30.9 | -101.7 | 19.4  |
| ERF                       | -0.4  | 31.0 | -61.2  | 60.4  |
| FHS                       | -28.5 | 14.2 | -56.4  | -0.7  |
| GENMETS                   | 10.8  | 37.5 | -62.8  | 84.3  |
| HBCS                      | -31.8 | 26.3 | -83.4  | 19.8  |
| INCHIANTI                 | -0.5  | 34.4 | -67.8  | 66.9  |
| INDIANA                   | -7.3  | 20.8 | -48.1  | 33.5  |
| INGI-VB                   | 23.4  | 29.0 | -33.5  | 80.3  |
| KORA F3                   | -57.2 | 31.1 | -118.2 | 3.7   |
| KORA S4                   | 16.2  | 27.7 | -38.1  | 70.5  |
| KORCULA                   | -46.6 | 41.8 | -128.5 | 35.4  |
| NFBC                      | -12.9 | 14.5 | -41.4  | 15.6  |
| NHS-BRCA                  | 17.1  | 16.6 | -15.6  | 49.7  |
| NHS-T2D                   | -10.5 | 14.3 | -38.5  | 17.4  |
| NTR                       | -7.4  | 24.0 | -54.5  | 39.6  |
| ORCADES                   | 56.2  | 40.1 | -22.4  | 134.9 |
| QIMR                      | -15.7 | 13.9 | -42.9  | 11.5  |
| RAINE                     | -4.7  | 25.5 | -54.6  | 45.3  |
| RS1                       | -19.7 | 16.4 | -51.9  | 12.5  |
| RS2                       | 15.0  | 28.1 | -40.1  | 70.1  |
| RS3                       | -14.2 | 25.9 | -65.1  | 36.6  |
| SAGE                      | -43.5 | 24.9 | -92.3  | 5.3   |
| SARDINIA                  | -18.6 | 23.7 | -65.2  | 27.9  |
| SPLIT                     | -56.1 | 56.1 | -166.1 | 53.8  |
| TWINSUK1                  | -3.5  | 11.5 | -25.9  | 19.0  |
| TWINSUK2                  | -11.3 | 35.5 | -81.0  | 58.3  |

|                             |       |      |        |       |
|-----------------------------|-------|------|--------|-------|
| TWINSUK3                    | -27.5 | 28.8 | -83.9  | 28.9  |
| VIS                         | -56.0 | 45.3 | -144.8 | 32.8  |
| WGHS                        | -10.2 | 5.8  | -21.7  | 1.2   |
| <b>STK33 (rs10769908-T)</b> |       |      |        |       |
| AGES                        | -0.4  | 15.6 | -31.0  | 30.2  |
| AMISH                       | -9.1  | 33.1 | -74.1  | 55.8  |
| ARIC                        | 11.5  | 11.4 | -11.0  | 33.9  |
| B58C-T1DGC                  | 1.6   | 21.8 | -41.2  | 44.4  |
| B58C-WTCCC                  | 8.6   | 28.7 | -47.7  | 64.8  |
| COLAUS                      | 9.1   | 15.8 | -21.9  | 40.0  |
| DECODE                      | 9.2   | 5.3  | -1.1   | 19.5  |
| DNBC                        | 15.7  | 16.4 | -16.5  | 47.9  |
| EGCUT                       | -13.0 | 26.9 | -65.7  | 39.8  |
| EPIC                        | -19.7 | 29.3 | -77.2  | 37.8  |
| ERF                         | -15.9 | 26.5 | -67.9  | 36.0  |
| FHS                         | 20.1  | 13.3 | -6.0   | 46.3  |
| GENMETS                     | -15.9 | 31.8 | -78.2  | 46.3  |
| HBCS                        | 19.3  | 24.1 | -28.0  | 66.6  |
| INCHIANTI                   | 22.4  | 31.0 | -38.3  | 83.0  |
| INDIANA                     | -2.6  | 19.0 | -39.8  | 34.7  |
| INGI-VB                     | 21.6  | 26.8 | -30.9  | 74.1  |
| KORA F3                     | 36.4  | 26.8 | -16.0  | 88.9  |
| KORA S4                     | -9.5  | 25.4 | -59.3  | 40.2  |
| KORCULA                     | 54.8  | 37.6 | -19.0  | 128.6 |
| NFBC                        | 3.6   | 12.7 | -21.4  | 28.5  |
| NHS-BRCA                    | 28.9  | 15.0 | -0.5   | 58.3  |
| NHS-T2D                     | 6.7   | 12.9 | -18.5  | 32.0  |
| NTR                         | -19.5 | 22.6 | -63.8  | 24.9  |
| ORCADES                     | -34.1 | 40.3 | -113.1 | 44.9  |
| QIMR                        | -     | -    | -      | -     |
| RAINE                       | 52.2  | 23.6 | 6.0    | 98.3  |
| RS1                         | 15.0  | 15.3 | -15.1  | 45.0  |
| RS2                         | 6.9   | 25.2 | -42.5  | 56.3  |
| RS3                         | 8.8   | 24.5 | -39.2  | 56.7  |
| SAGE                        | 18.4  | 22.5 | -25.6  | 62.5  |
| SARDINIA                    | -     | -    | -      | -     |
| SPLIT                       | -28.4 | 47.8 | -122.0 | 65.3  |
| TWINSUK1                    | 3.1   | 7.9  | -12.4  | 18.6  |
| TWINSUK2                    | 14.7  | 32.0 | -48.1  | 77.5  |

|          |      |      |       |       |
|----------|------|------|-------|-------|
| TWINSUK3 | 2.6  | 24.6 | -45.6 | 50.8  |
| VIS      | 43.6 | 37.7 | -30.2 | 117.5 |
| WGHS     | 12.8 | 5.1  | 2.8   | 22.8  |

---

<sup>a</sup>For study abbreviations see Web Table 1.

**Web Table 7.** SNP-Associations with Age at Menarche Using Family Wise Error Rate or False Discovery Rate to Adjust for Multiple Testing, Ranked From Lowest to Highest Nominal *P* Values<sup>a</sup>

| SNP ID     | Nominal<br><i>P</i> value | Bonferroni<br><i>P</i> value | Holm<br><i>P</i> value | FDR                   | pFDR                  |
|------------|---------------------------|------------------------------|------------------------|-----------------------|-----------------------|
| rs9939609  | 4.2X10 <sup>-12</sup>     | 3.9X10 <sup>-10</sup>        | 3.9X10 <sup>-10</sup>  | 2.9X10 <sup>-10</sup> | 1.3X10 <sup>-10</sup> |
| rs1558902  | 6.2X10 <sup>-12</sup>     | 5.8X10 <sup>-10</sup>        | 5.8X10 <sup>-10</sup>  | 2.9X10 <sup>-10</sup> | 1.3X10 <sup>-10</sup> |
| rs8050136  | 9.5X10 <sup>-12</sup>     | 9.1X10 <sup>-10</sup>        | 8.9X10 <sup>-10</sup>  | 3.0X10 <sup>-10</sup> | 1.3X10 <sup>-10</sup> |
| rs1121980  | 2.6X10 <sup>-11</sup>     | 2.5X10 <sup>-9</sup>         | 2.4X10 <sup>-9</sup>   | 6.1X10 <sup>-10</sup> | 2.7X10 <sup>-10</sup> |
| rs543874   | 6.7X10 <sup>-10</sup>     | 6.4x10 <sup>-8</sup>         | 6.1x10 <sup>-8</sup>   | 1.3x10 <sup>-8</sup>  | 5.6X10 <sup>-9</sup>  |
| rs2867125  | 1.6X10 <sup>-9</sup>      | 1.5X10 <sup>-7</sup>         | 1.5X10 <sup>-7</sup>   | 2.6x10 <sup>-8</sup>  | 1.1x10 <sup>-8</sup>  |
| rs7561317  | 8.5X10 <sup>-9</sup>      | 8.1X10 <sup>-7</sup>         | 7.6X10 <sup>-7</sup>   | 1.2X10 <sup>-7</sup>  | 5.0x10 <sup>-8</sup>  |
| rs6548238  | 2.1X10 <sup>-8</sup>      | 2.0X10 <sup>-6</sup>         | 1.8X10 <sup>-6</sup>   | 2.4X10 <sup>-7</sup>  | 1.1X10 <sup>-7</sup>  |
| rs2568958  | 3.3X10 <sup>-8</sup>      | 3.2X10 <sup>-6</sup>         | 2.9X10 <sup>-6</sup>   | 3.3X10 <sup>-7</sup>  | 1.4X10 <sup>-7</sup>  |
| rs2815752  | 3.5X10 <sup>-8</sup>      | 3.3X10 <sup>-6</sup>         | 3.0X10 <sup>-6</sup>   | 3.3X10 <sup>-7</sup>  | 1.4X10 <sup>-7</sup>  |
| rs10913469 | 8.5x10 <sup>-8</sup>      | 8.0X10 <sup>-6</sup>         | 7.2X10 <sup>-6</sup>   | 7.3X10 <sup>-7</sup>  | 3.2X10 <sup>-7</sup>  |
| rs10938397 | 1.7X10 <sup>-7</sup>      | 1.6X10 <sup>-5</sup>         | 1.4X10 <sup>-5</sup>   | 1.3X10 <sup>-6</sup>  | 5.8X10 <sup>-7</sup>  |
| rs1514175  | 4.0X10 <sup>-7</sup>      | 3.8X10 <sup>-5</sup>         | 3.3X10 <sup>-5</sup>   | 2.9X10 <sup>-6</sup>  | 1.3X10 <sup>-6</sup>  |
| rs713586   | 8.4X10 <sup>-7</sup>      | 7.9X10 <sup>-5</sup>         | 6.9X10 <sup>-5</sup>   | 5.7X10 <sup>-6</sup>  | 2.5X10 <sup>-6</sup>  |
| rs7138803  | 2.2X10 <sup>-6</sup>      | 2.1X10 <sup>-4</sup>         | 1.8X10 <sup>-4</sup>   | 1.4X10 <sup>-5</sup>  | 6.1X10 <sup>-6</sup>  |
| rs10767664 | 3.6X10 <sup>-6</sup>      | 3.4X10 <sup>-4</sup>         | 2.9X10 <sup>-4</sup>   | 2.1X10 <sup>-5</sup>  | 9.2X10 <sup>-6</sup>  |
| rs925946   | 5.9X10 <sup>-6</sup>      | 5.6X10 <sup>-4</sup>         | 4.6X10 <sup>-4</sup>   | 3.2X10 <sup>-5</sup>  | 1.4X10 <sup>-5</sup>  |
| rs2241423  | 6.1X10 <sup>-6</sup>      | 5.8X10 <sup>-4</sup>         | 4.8X10 <sup>-4</sup>   | 3.2X10 <sup>-5</sup>  | 1.4X10 <sup>-5</sup>  |
| rs29941    | 9.3X10 <sup>-6</sup>      | 8.8X10 <sup>-4</sup>         | 7.1X10 <sup>-4</sup>   | 4.6X10 <sup>-5</sup>  | 2.0X10 <sup>-5</sup>  |
| rs7481311  | 1.3X10 <sup>-5</sup>      | 1.2X10 <sup>-3</sup>         | 9.8X10 <sup>-4</sup>   | 6.1X10 <sup>-5</sup>  | 2.7X10 <sup>-5</sup>  |
| rs6265     | 1.7X10 <sup>-5</sup>      | 1.6X10 <sup>-3</sup>         | 1.3X10 <sup>-3</sup>   | 7.6X10 <sup>-5</sup>  | 3.3X10 <sup>-5</sup>  |
| rs4923461  | 2.4X10 <sup>-5</sup>      | 2.2X10 <sup>-3</sup>         | 1.7X10 <sup>-3</sup>   | 1.0X10 <sup>-4</sup>  | 4.4X10 <sup>-5</sup>  |
| rs987237   | 3.3X10 <sup>-5</sup>      | 3.1X10 <sup>-3</sup>         | 2.4X10 <sup>-3</sup>   | 1.3X10 <sup>-4</sup>  | 5.8X10 <sup>-5</sup>  |
| rs887912   | 3.8X10 <sup>-5</sup>      | 3.6X10 <sup>-3</sup>         | 2.7X10 <sup>-3</sup>   | 1.5X10 <sup>-4</sup>  | 6.5X10 <sup>-5</sup>  |
| rs4929949  | 4.1X10 <sup>-5</sup>      | 3.9X10 <sup>-3</sup>         | 2.9X10 <sup>-3</sup>   | 1.6X10 <sup>-4</sup>  | 6.8X10 <sup>-5</sup>  |
| rs9816226  | 7.0X10 <sup>-5</sup>      | 6.6X10 <sup>-3</sup>         | 4.9X10 <sup>-3</sup>   | 2.5X10 <sup>-4</sup>  | 1.1X10 <sup>-4</sup>  |



|            |                            |                            |                            |                            |                            |
|------------|----------------------------|----------------------------|----------------------------|----------------------------|----------------------------|
| rs10769908 | <b>7.8X10<sup>-5</sup></b> | <b>7.4X10<sup>-3</sup></b> | <b>5.4X10<sup>-3</sup></b> | <b>2.8X10<sup>-4</sup></b> | <b>1.2X10<sup>-4</sup></b> |
| rs11084753 | <b>1.0X10<sup>-4</sup></b> | <b>9.6X10<sup>-3</sup></b> | <b>6.8X10<sup>-3</sup></b> | <b>3.4X10<sup>-4</sup></b> | <b>1.5X10<sup>-4</sup></b> |
| rs12444979 | <b>2.6X10<sup>-4</sup></b> | <b>2.5X10<sup>-2</sup></b> | <b>1.7X10<sup>-2</sup></b> | <b>8.5X10<sup>-4</sup></b> | <b>3.7X10<sup>-4</sup></b> |
| rs3810291  | <b>1.6X10<sup>-3</sup></b> | 0.16                       | 0.11                       | <b>5.2X10<sup>-3</sup></b> | <b>2.3X10<sup>-3</sup></b> |
| rs6429082  | <b>3.1X10<sup>-3</sup></b> | 0.30                       | 0.20                       | <b>9.6X10<sup>-3</sup></b> | <b>4.2X10<sup>-3</sup></b> |
| rs7647305  | <b>3.3X10<sup>-3</sup></b> | 0.31                       | 0.21                       | <b>9.7X10<sup>-3</sup></b> | <b>4.2X10<sup>-3</sup></b> |
| rs7826222  | <b>5.2X10<sup>-3</sup></b> | 0.50                       | 0.33                       | <b>1.5X10<sup>-2</sup></b> | <b>6.5X10<sup>-3</sup></b> |
| rs11847697 | <b>6.3X10<sup>-3</sup></b> | 0.60                       | 0.39                       | <b>1.8X10<sup>-2</sup></b> | <b>7.7X10<sup>-3</sup></b> |
| rs4771122  | <b>1.2X10<sup>-2</sup></b> | 1.0                        | 0.75                       | <b>3.4X10<sup>-2</sup></b> | <b>1.5X10<sup>-2</sup></b> |
| rs824931   | <b>2.0X10<sup>-2</sup></b> | 1.0                        | 1.0                        | 5.2X10 <sup>-2</sup>       | <b>2.3X10<sup>-2</sup></b> |
| rs1024889  | <b>2.0X10<sup>-2</sup></b> | 1.0                        | 1.0                        | 5.2X10 <sup>-2</sup>       | <b>2.3X10<sup>-2</sup></b> |
| rs6499640  | <b>2.9X10<sup>-2</sup></b> | 1.0                        | 1.0                        | 7.2X10 <sup>-2</sup>       | <b>3.1X10<sup>-2</sup></b> |
| rs3803915  | <b>3.3X10<sup>-2</sup></b> | 1.0                        | 1.0                        | 8.0X10 <sup>-2</sup>       | <b>3.5X10<sup>-2</sup></b> |
| rs1458095  | <b>3.8X10<sup>-2</sup></b> | 1.0                        | 1.0                        | 9.0X10 <sup>-2</sup>       | <b>3.9X10<sup>-2</sup></b> |
| rs13107325 | <b>4.0X10<sup>-2</sup></b> | 1.0                        | 1.0                        | 9.2X10 <sup>-2</sup>       | <b>4.0X10<sup>-2</sup></b> |
| rs10146997 | <b>4.2X10<sup>-2</sup></b> | 1.0                        | 1.0                        | 9.4X10 <sup>-2</sup>       | <b>4.1X10<sup>-2</sup></b> |
| rs206936   | <b>4.3X10<sup>-2</sup></b> | 1.0                        | 1.0                        | 9.5X10 <sup>-2</sup>       | <b>4.1X10<sup>-2</sup></b> |
| rs10150332 | <b>4.7X10<sup>-2</sup></b> | 1.0                        | 1.0                        | 0.10                       | <b>4.5X10<sup>-2</sup></b> |
| rs12324805 | 5.3X10 <sup>-2</sup>       | 1.0                        | 1.0                        | 0.11                       | <b>4.9X10<sup>-2</sup></b> |
| rs571312   | 6.4X10 <sup>-2</sup>       | 1.0                        | 1.0                        | 0.13                       | 5.7X10 <sup>-2</sup>       |
| rs4701252  | 6.8X10 <sup>-2</sup>       | 1.0                        | 1.0                        | 0.14                       | 6.0X10 <sup>-2</sup>       |
| rs1106683  | 7.7X10 <sup>-2</sup>       | 1.0                        | 1.0                        | 0.15                       | 6.7X10 <sup>-2</sup>       |
| rs10838738 | 7.9X10 <sup>-2</sup>       | 1.0                        | 1.0                        | 0.15                       | 6.7X10 <sup>-2</sup>       |
| rs17782313 | 8.3X10 <sup>-2</sup>       | 1.0                        | 1.0                        | 0.16                       | 6.8X10 <sup>-2</sup>       |
| rs3817334  | 8.4X10 <sup>-2</sup>       | 1.0                        | 1.0                        | 0.16                       | 6.8X10 <sup>-2</sup>       |
| rs1106684  | 9.0X10 <sup>-2</sup>       | 1.0                        | 1.0                        | 0.16                       | 7.2X10 <sup>-2</sup>       |
| rs6861681  | 0.12                       | 1.0                        | 1.0                        | 0.21                       | 9.1X10 <sup>-2</sup>       |
| rs718314   | 0.14                       | 1.0                        | 1.0                        | 0.24                       | 0.10                       |
| rs7081678  | 0.14                       | 1.0                        | 1.0                        | 0.24                       | 0.10                       |
| rs1555543  | 0.16                       | 1.0                        | 1.0                        | 0.27                       | 0.12                       |

|            |      |     |     |      |      |
|------------|------|-----|-----|------|------|
| rs2287019  | 0.22 | 1.0 | 1.0 | 0.37 | 0.16 |
| rs2145270  | 0.27 | 1.0 | 1.0 | 0.44 | 0.19 |
| rs1927702  | 0.30 | 1.0 | 1.0 | 0.49 | 0.21 |
| rs1333026  | 0.32 | 1.0 | 1.0 | 0.49 | 0.21 |
| rs7359397  | 0.32 | 1.0 | 1.0 | 0.49 | 0.21 |
| rs2275215  | 0.32 | 1.0 | 1.0 | 0.49 | 0.21 |
| rs7932813  | 0.34 | 1.0 | 1.0 | 0.52 | 0.22 |
| rs6795735  | 0.36 | 1.0 | 1.0 | 0.53 | 0.23 |
| rs10783050 | 0.36 | 1.0 | 1.0 | 0.53 | 0.23 |
| rs2890652  | 0.38 | 1.0 | 1.0 | 0.53 | 0.23 |
| rs1875517  | 0.38 | 1.0 | 1.0 | 0.53 | 0.23 |
| rs2112347  | 0.39 | 1.0 | 1.0 | 0.53 | 0.23 |
| rs7498665  | 0.39 | 1.0 | 1.0 | 0.53 | 0.23 |
| rs4836133  | 0.40 | 1.0 | 1.0 | 0.54 | 0.24 |
| rs6905288  | 0.48 | 1.0 | 1.0 | 0.64 | 0.28 |
| rs1443512  | 0.50 | 1.0 | 1.0 | 0.66 | 0.29 |
| rs1878047  | 0.51 | 1.0 | 1.0 | 0.66 | 0.29 |
| rs1555967  | 0.53 | 1.0 | 1.0 | 0.69 | 0.30 |
| rs13078807 | 0.56 | 1.0 | 1.0 | 0.70 | 0.31 |
| rs1294421  | 0.58 | 1.0 | 1.0 | 0.72 | 0.31 |
| rs2605100  | 0.59 | 1.0 | 1.0 | 0.72 | 0.31 |
| rs10458787 | 0.59 | 1.0 | 1.0 | 0.72 | 0.31 |
| rs4846567  | 0.63 | 1.0 | 1.0 | 0.74 | 0.32 |
| rs9491696  | 0.63 | 1.0 | 1.0 | 0.74 | 0.32 |
| rs489693   | 0.63 | 1.0 | 1.0 | 0.74 | 0.32 |
| rs2383393  | 0.67 | 1.0 | 1.0 | 0.77 | 0.34 |
| rs12970134 | 0.69 | 1.0 | 1.0 | 0.79 | 0.34 |
| rs1055144  | 0.72 | 1.0 | 1.0 | 0.82 | 0.36 |
| rs4823006  | 0.78 | 1.0 | 1.0 | 0.87 | 0.38 |
| rs10968576 | 0.81 | 1.0 | 1.0 | 0.89 | 0.38 |

|            |      |     |     |      |      |
|------------|------|-----|-----|------|------|
| rs3934834  | 0.81 | 1.0 | 1.0 | 0.89 | 0.38 |
| rs12517906 | 0.84 | 1.0 | 1.0 | 0.90 | 0.39 |
| rs1011731  | 0.85 | 1.0 | 1.0 | 0.90 | 0.39 |
| rs6784615  | 0.86 | 1.0 | 1.0 | 0.91 | 0.39 |
| rs2076529  | 0.88 | 1.0 | 1.0 | 0.92 | 0.40 |
| rs10195252 | 0.92 | 1.0 | 1.0 | 0.95 | 0.41 |
| rs1152846  | 0.96 | 1.0 | 1.0 | 0.98 | 0.42 |
| rs984222   | 0.97 | 1.0 | 1.0 | 0.98 | 0.43 |
| rs4471028  | 1.0  | 1.0 | 1.0 | 1.0  | 0.43 |

Abbreviations: FDR, False discovery rate; pFDR, Positive false discovery rate

<sup>a</sup>P values are shown to two significant digits and those in bold represent SNP-associations below the 5% threshold for either (family wise) type 1 error rate or false discovery rate.

**Web Table 8.** Number of SNPs Associated with Age at Menarche at Various Thresholds Using Either Family Wise Error Rate or False Discovery Rate Methodologies

| <b>Threshold</b> | <b>Bonferroni</b> | <b>Holm</b> | <b>FDR</b> | <b>pFDR</b> |
|------------------|-------------------|-------------|------------|-------------|
| 0.01             | 28                | 28          | 32         | 34          |
| 0.05             | 29                | 29          | 35         | 45          |
| 0.10             | 29                | 29          | 43         | 53          |
| 0.15             | 29                | 30          | 47         | 56          |
| 0.20             | 30                | 30          | 52         | 58          |
| 0.25             | 30                | 32          | 55         | 70          |

Abbreviations: FDR, False discovery rate; pFDR, Positive false discovery rate

**Web Table 9.** Genes Within 300kb From the 32 Confirmed BMI SNPs that are Associated Suggestively (in Bold), and Significantly (in Red) With Age at Menarche Loci

| Term type   | Term name                                | Genes in significantly enriched pathways nearby loci implicated in BMI                     |
|-------------|------------------------------------------|--------------------------------------------------------------------------------------------|
| Panther, BP | Protein phosphorylation                  | <i>COL4A3BP, DMPK, FLJ40125, <b>MAP2K5</b>, PACSIN1, PRKD1, <b>STK33, TNNI3K</b></i>       |
| Panther     | PDGF signalling                          | <i>SPDEF</i>                                                                               |
| Panther, MF | Homeobox TF                              | <i><b>IRX3</b>, MEIS3, SIX5</i>                                                            |
| Panther, MF | Translation Elongation Factor            | <i>TUFM</i>                                                                                |
| GO, BP      | Neurogenesis                             | <i><b>NRXN3, RACGAP1</b></i>                                                               |
| GO, BP      | Neuron differentiation                   | <i><b>NRXN3</b></i>                                                                        |
| GO, BP      | Generation of neurons                    | <i><b>NRXN3, RACGAP1</b></i>                                                               |
| GO, BP      | Regulation of cellular metabolic process | <i><b>AKTIP, ERCC1, FOSB, GRLF1, HMGA1, IGF2BP2, MTIF3, SMARCD1, SPI1, SPN, TFAP2B</b></i> |
| GO, MF      | Hormone receptor binding                 | <i>HMGA1</i>                                                                               |
| GO, MF      | Nuclear hormone receptor binding         | <i>HMGA1</i>                                                                               |

**Web Table 10.** gProfiler Results for Enrichment in Biologic Pathways of the Gene Nearest (n=16) to Waist Circumference and BMI SNPs Implicated<sup>a</sup> in Age at Menarche, Using a *P* value Cutoff of 0.01<sup>b</sup>

| Term type         | Term name                                    | # Genes under this term | <i>P</i> value <sup>c</sup> | Genes implicated                                                            |
|-------------------|----------------------------------------------|-------------------------|-----------------------------|-----------------------------------------------------------------------------|
| Gene Ontology, BP | tube development                             | 401                     | 2.98X10 <sup>-3</sup>       | <i>BDNF, ETV5, TFAP2B</i>                                                   |
| Gene Ontology, BP | eye morphogenesis                            | 115                     | 3.22X10 <sup>-3</sup>       | <i>BDNF, TFAP2B</i>                                                         |
| Gene Ontology, BP | regulation of organ morphogenesis            | 123                     | 3.67X10 <sup>-3</sup>       | <i>BDNF, ETV5</i>                                                           |
| Gene Ontology, BP | regulation of neuron apoptosis               | 148                     | 5.27X10 <sup>-3</sup>       | <i>BDNF, TFAP2B</i>                                                         |
| Gene Ontology, BP | macromolecule modification                   | 2386                    | 5.46X10 <sup>-3</sup>       | <i>FANCL, FTO, MAP2K5, MSRA, ADCY3, STK33</i>                               |
| Gene Ontology, BP | neuron apoptosis                             | 162                     | 6.28X10 <sup>-3</sup>       | <i>BDNF, TFAP2B</i>                                                         |
| Gene Ontology, BP | neuron death                                 | 166                     | 6.58X10 <sup>-3</sup>       | <i>BDNF, TFAP2B</i>                                                         |
| Gene Ontology, BP | regulation of cell proliferation             | 1099                    | 7.46X10 <sup>-3</sup>       | <i>BDNF, FTO, MAP2K5, TFAP2B</i>                                            |
| Gene Ontology, BP | negative regulation of apoptosis             | 580                     | 8.34X10 <sup>-3</sup>       | <i>BDNF, FAIM2, TFAP2B</i>                                                  |
| Gene Ontology, BP | negative regulation of programmed cell death | 586                     | 8.58X10 <sup>-3</sup>       | <i>BDNF, FAIM2, TFAP2B</i>                                                  |
| Gene Ontology, BP | negative regulation of cell death            | 604                     | 9.32X10 <sup>-3</sup>       | <i>BDNF, FAIM2, TFAP2B</i>                                                  |
| Gene Ontology, CC | nucleus                                      | 5916                    | 3.49X10 <sup>-3</sup>       | <i>ETV5, FANCL, FTO, GPRC5B, MAP2K5, MSRA, ADCY3, STK33, TFAP2B, TMEM18</i> |
| Gene Ontology, CC | postsynaptic membrane                        | 174                     | 7.21X10 <sup>-3</sup>       | <i>FAIM2, LIN7C</i>                                                         |
| Gene Ontology, CC | synaptic membrane                            | 199                     | 9.33X10 <sup>-3</sup>       | <i>FAIM2, LIN7C</i>                                                         |
| KEGG              | Gap junction                                 | 97                      | 2.31X10 <sup>-3</sup>       | <i>MAP2K5, ADCY3</i>                                                        |
| KEGG              | Neurotrophin signaling pathway               | 126                     | 3.85X10 <sup>-3</sup>       | <i>BDNF, MAP2K5</i>                                                         |
| REACTOME          | TRKA signalling from the plasma membrane     | 99                      | 2.40X10 <sup>-3</sup>       | <i>MAP2K5, ADCY3</i>                                                        |
| REACTOME          | Signalling by NGF                            | 167                     | 6.66X10 <sup>-3</sup>       | <i>MAP2K5, ADCY3</i>                                                        |

<sup>a</sup>Below a Bonferroni correction for 95 tests (*P*<0.0005).

<sup>b</sup>Using the following input parameters: *P* value cutoff=0.01, significance threshold=Bonferroni, statistical domain size=all annotated genes.

<sup>c</sup>No results were considered to be significant after Bonferonni correction, as gProfiler did not out put any in bold.

**Web Table 11.** gProfiler Results for Enrichment in Biologic Pathways of the Gene Nearest (n=23) to Waist Circumference and BMI SNPs Implicated<sup>a</sup> and Suggestively<sup>b</sup> Associated with Age at Menarche, Using a *P* value Cutoff of 0.001<sup>c</sup>

| Term type         | Term name                         | # Genes under this term | <i>P</i> value <sup>d</sup> | Genes implicated                                                                                      |
|-------------------|-----------------------------------|-------------------------|-----------------------------|-------------------------------------------------------------------------------------------------------|
| Gene Ontology, BP | circulatory system development    | 686                     | 6.70X10 <sup>-4</sup>       | <i>MAP2K5, TFAP2B, NRXN3, PRKD1, PAX3</i>                                                             |
| Gene Ontology, BP | cardiovascular system development | 686                     | 6.70X10 <sup>-4</sup>       | <i>MAP2K5, TFAP2B, NRXN3, PRKD1, PAX3</i>                                                             |
| Gene Ontology, BP | tube development                  | 401                     | 7.87X10 <sup>-4</sup>       | <i>BDNF, ETV5, TFAP2B, PAX3</i>                                                                       |
| Gene Ontology, BP | regulation of cell proliferation  | 1099                    | 8.24X10 <sup>-4</sup>       | <i>BDNF, FTO, MAP2K5, TFAP2B, PRKD1, PAX3</i>                                                         |
| Gene Ontology, CC | nucleus                           | 5916                    | 7.89X10 <sup>-4</sup>       | <i>ETV5, FANCL, FTO, GPRC5B, MAP2K5, MSRA, ADCY3, STK33, TFAP2B, TMEM18, PRKD1, DOT1L, PAX3, TBCE</i> |

<sup>a</sup>Below a Bonferroni correction for 95 tests ( $P < 0.0005$ ).

<sup>b</sup>Suggestive associations were defined as  $P < 0.05$  with inverse effects on BMI and age at menarche.

<sup>c</sup>Using the following input parameters: *P* value cutoff=0.001, significance threshold=Bonferroni, statistical domain size=all annotated genes.

<sup>d</sup>No results were considered to be significant after Bonferroni correction, as gProfiler did not output any in bold.



**Web Table 12.** gProfiler Results for Enrichment in Biologic Pathways of the Gene Nearest (n=18) to BMI SNPs Not Suggestively<sup>a</sup> Associated with Age at Menarche, Using a *P* value Cutoff of 0.01<sup>b</sup>

| Term type         | Term name                                               | # Genes under this term | <i>P</i> value <sup>c</sup> | Genes implicated                |
|-------------------|---------------------------------------------------------|-------------------------|-----------------------------|---------------------------------|
| Gene Ontology, BP | regulation of cell migration                            | 325                     | 2.34X10-3                   | <i>BMP2, LAMA2, PODXL</i>       |
| Gene Ontology, BP | regulation of cell motility                             | 340                     | 2.66X10-3                   | <i>BMP2, LAMA2, PODXL</i>       |
| Gene Ontology, BP | regulation of cellular component movement               | 364                     | 3.22X10-3                   | <i>BMP2, LAMA2, PODXL</i>       |
| Gene Ontology, BP | regulation of locomotion                                | 369                     | 3.35X10-3                   | <i>BMP2, LAMA2, PODXL</i>       |
| Gene Ontology, BP | positive regulation of multicellular organismal process | 442                     | 5.55X10-3                   | <i>BMP2, MC4R, PROK2</i>        |
| Gene Ontology, BP | biological adhesion                                     | 923                     | 6.30X10-3                   | <i>LAMA2, LPP, PCDH9, PODXL</i> |
| Gene Ontology, BP | cell adhesion                                           | 923                     | 6.30X10-3                   | <i>LAMA2, LPP, PCDH9, PODXL</i> |
| Gene Ontology, BP | rhythmic process                                        | 191                     | 1.09X10-2                   | <i>BMP2, PROK2</i>              |

<sup>a</sup>Suggestive associations were defined as  $P < 0.05$  with inverse effects on BMI and age at menarche.

<sup>b</sup>Using the following input parameters: *P* value cutoff=0.01, significance threshold=Bonferroni, statistical domain size=all annotated genes.

<sup>c</sup>No results were considered to be significant after Bonferroni correction, as gProfiler did not output any in bold.

**Web Table 13.** gProfiler Results for Enrichment in Biologic Pathways of the Gene Nearest (n=20) to Waist Circumference and Waist-Hip Ratio SNPs Not Suggestively<sup>a</sup> Associated with Age at Menarche, Using a *P* value Cutoff of 0.01<sup>b</sup>

| Term type         | Term name                                          | # Genes under this term | <i>P</i> value <sup>c</sup> | Genes implicated                 |
|-------------------|----------------------------------------------------|-------------------------|-----------------------------|----------------------------------|
| Gene Ontology, BP | regulation of bone resorption                      | 24                      | 2.23X10 <sup>-4</sup>       | <i>MC4R, VEGFA</i>               |
| Gene Ontology, BP | regulation of bone remodeling                      | 25                      | 2.42X10 <sup>-4</sup>       | <i>MC4R, VEGFA</i>               |
| Gene Ontology, BP | regulation of tissue remodeling                    | 37                      | 5.33X10 <sup>-4</sup>       | <i>MC4R, VEGFA</i>               |
| Gene Ontology, BP | bone resorption                                    | 39                      | 5.93X10 <sup>-4</sup>       | <i>MC4R, VEGFA</i>               |
| Gene Ontology, BP | bone remodeling                                    | 50                      | 9.74X10 <sup>-4</sup>       | <i>MC4R, VEGFA</i>               |
| Gene Ontology, BP | embryonic organ development                        | 287                     | 2.25X10 <sup>-3</sup>       | <i>RSPO3, TBX15, VEGFA</i>       |
| Gene Ontology, BP | secretion by cell                                  | 648                     | 2.66X10 <sup>-3</sup>       | <i>ITPR2, MC4R, NISCH, VEGFA</i> |
| Gene Ontology, BP | tissue homeostasis                                 | 96                      | 3.53X10 <sup>-3</sup>       | <i>MC4R, VEGFA</i>               |
| Gene Ontology, BP | negative regulation of cellular component movement | 97                      | 3.61X10 <sup>-3</sup>       | <i>NISCH, PKHD1</i>              |
| Gene Ontology, BP | tissue remodeling                                  | 102                     | 3.98X10 <sup>-3</sup>       | <i>MC4R, VEGFA</i>               |
| Gene Ontology, BP | secretion                                          | 735                     | 4.19X10 <sup>-3</sup>       | <i>ITPR2, MC4R, NISCH, VEGFA</i> |
| Gene Ontology, BP | regulation of cellular component movement          | 364                     | 4.39X10 <sup>-3</sup>       | <i>NISCH, PKHD1, VEGFA</i>       |
| Gene Ontology, BP | multicellular organismal homeostasis               | 140                     | 7.36X10 <sup>-3</sup>       | <i>DNM3, PKHD1</i>               |
| Gene Ontology, BP | chordate embryonic development                     | 450                     | 7.90X10 <sup>-3</sup>       | <i>RSPO3, TBX15, VEGFA</i>       |
| Gene Ontology, BP | embryo development ending in birth or egg hatching | 457                     | 8.24X10 <sup>-3</sup>       | <i>RSPO3, TBX15, VEGFA</i>       |
| Gene Ontology, BP | cell projection assembly                           | 156                     | 9.07X10 <sup>-3</sup>       | <i>DNM3, PKHD1</i>               |
| Gene Ontology, BP | insulin secretion                                  | 158                     | 9.29X10 <sup>-3</sup>       | <i>ITPR2, MC4R</i>               |
| Gene Ontology, BP | canonical Wnt receptor signaling pathway           | 159                     | 9.40X10 <sup>-3</sup>       | <i>KREMEN1, RSPO3</i>            |
| Gene Ontology, BP | kidney development                                 | 164                     | 9.98X10 <sup>-3</sup>       | <i>PKHD1, VEGFA</i>              |
| Gene Ontology, BP | renal system development                           | 170                     | 1.07X10 <sup>-2</sup>       | <i>PKHD1, VEGFA</i>              |

|                   |                                         |     |           |                     |
|-------------------|-----------------------------------------|-----|-----------|---------------------|
| Gene Ontology, BP | morphogenesis of a branching epithelium | 171 | 1.08X10-2 | <i>RSPO3, VEGFA</i> |
| Gene Ontology, MF | phosphatidylinositol binding            | 138 | 7.16X10-3 | <i>ITPR2, NISCH</i> |
| Gene Ontology, MF | heparin binding                         | 144 | 7.77X10-3 | <i>RSPO3, VEGFA</i> |

---

<sup>a</sup>Suggestive associations were defined as  $P < 0.05$  with inverse effects on BMI and age at menarche.

<sup>b</sup>Using the following input parameters:  $P$  value cutoff=0.01, significance threshold=Bonferroni, statistical domain size=all annotated genes.

<sup>c</sup>No results were considered to be significant after Bonferonni correction, as gProfiler did not out put any in bold.
